# Supplementary material for: Genome Refinement in Pacific Bluefin Tuna (Thunnus orientalis): Chromosome-level Assembly Using Hybrid Linkage Data
Source: Research Square preprint supplement (doi:10.21203/rs.3.rs-7883235/v1), 2025-11-04
Supplement: Supplementary file 1 [file 3791ad403deb3b2e482f0d6b.docx]

**Genome Refinement in Pacific Bluefin Tuna *Thunnus orientalis*: Chromosome-Level Assembly Using Hybrid Linkage Data**

Xi Fu1, Daiki Saka1, Kazutoshi Yoshitake2, Taiju Saito3, Milos Havelka3, Osamu Nishimiya3, Takahiro Matsubara3, Rie Goto3, Toshinao Ineno4, Shuichi Asakawa1,*

1 Graduate School of Agricultural and Life Sciences, The University of Tokyo, Tokyo, 113-8657, Japan

2 School of Marine Biosciences, Kitasato University, Kanagawa, 252-0373, Japan

3 South Ehime Fisheries Research Center, Ehime University, Ainan, 798-4205, Japan

4Aquaculture Research Institute, Shingu Station, Kindai University, Wakayama, 647-1101, Japan

*To whom correspondence should be addressed.

**Table S1. Paired-end RNA-seq read information.** Forty-six previously released, paired-end RNA-seq data were used as RNA-seq sources for the *T. orientalis* genome annotation. Mapping was performed by STAR v.2.7.11b (STAR, RRID: SCR_004463).

| **Experiment Run ID** | **Experiment ID** | **Sequence Read Archive ID** | **Tissue** | **Uniquely mapped reads (%)** |
| --- | --- | --- | --- | --- |
| **DRR458350** | DRX442617 | DRP009968 | ovary | 88.95 |
| **DRR458351** | DRX442618 | DRP009968 | ovary | 88.93 |
| **DRR458352** | DRX442619 | DRP009968 | ovary | 89.31 |
| **DRR458353** | DRX442620 | DRP009968 | tastis | 88.40 |
| **DRR458354** | DRX442621 | DRP009968 | tastis | 89.58 |
| **DRR458355** | DRX442622 | DRP009968 | tastis | 89.09 |
| **SRR8756174** | SRX5546927 | SRP188943 | White muscle | 95.99 |
| **SRR8756175** | SRX5546926 | SRP188943 | Superficial white muscle | 93.86 |
| **SRR8756176** | SRX5546925 | SRP188943 | Superficial red muscle | 87.00 |
| **SRR8756177** | SRX5546924 | SRP188943 | Deep red muscle | 82.78 |
| **SRR8756178** | SRX5546923 | SRP188943 | Superficial white muscle | 93.07 |
| **SRR8756179** | SRX5546922 | SRP188943 | Deep white muscle | 92.79 |
| **SRR8756180** | SRX5546921 | SRP188943 | Compact Ventricle | 85.57 |
| **SRR8756181** | SRX5546920 | SRP188943 | Atrium | 83.99 |
| **SRR8756182** | SRX5546919 | SRP188943 | Deep white muscle | 92.65 |
| **SRR8756183** | SRX5546918 | SRP188943 | Spongy Ventricle | 86.21 |
| **SRR8756184** | SRX5546917 | SRP188943 | White muscle | 94.35 |
| **SRR8756185** | SRX5546916 | SRP188943 | White muscle | 93.39 |
| **SRR8756186** | SRX5546915 | SRP188943 | White muscle | 84.35 |
| **SRR8756187** | SRX5546914 | SRP188943 | White muscle | 83.40 |
| **SRR8756188** | SRX5546913 | SRP188943 | White muscle | 79.06 |
| **SRR8756189** | SRX5546912 | SRP188943 | White muscle | 74.35 |
| **SRR8756190** | SRX5546911 | SRP188943 | White muscle | 85.37 |
| **SRR8756191** | SRX5546910 | SRP188943 | White muscle | 93.65 |
| **SRR8756192** | SRX5546909 | SRP188943 | White muscle | 30.85 |
| **SRR8756193** | SRX5546908 | SRP188943 | White muscle | 41.72 |
| **SRR8756194** | SRX5546907 | SRP188943 | Compact Ventricle | 84.32 |
| **SRR8756195** | SRX5546906 | SRP188943 | Spongy Ventricle | 83.73 |
| **SRR8756196** | SRX5546905 | SRP188943 | Spongy Ventricle | 84.58 |
| **SRR8756197** | SRX5546904 | SRP188943 | Deep red muscle | 86.27 |
| **SRR8756198** | SRX5546903 | SRP188943 | Atrium | 83.78 |
| **SRR8756199** | SRX5546902 | SRP188943 | Compact Ventricle | 87.91 |
| **SRR8756200** | SRX5546901 | SRP188943 | Superficial white muscle | 93.05 |
| **SRR8756201** | SRX5546900 | SRP188943 | Atrium | 81.27 |
| **SRR8756202** | SRX5546899 | SRP188943 | Superficial red muscle | 91.99 |
| **SRR8756203** | SRX5546898 | SRP188943 | Deep white muscle | 92.62 |
| **SRR8756204** | SRX5546897 | SRP188943 | White muscle | 87.47 |
| **SRR8756205** | SRX5546896 | SRP188943 | White muscle | 73.51 |
| **SRR8756206** | SRX5546895 | SRP188943 | White muscle | 87.88 |
| **SRR8756207** | SRX5546894 | SRP188943 | White muscle | 85.59 |
| **SRR8756208** | SRX5546893 | SRP188943 | Red muscle | 74.01 |
| **SRR8756209** | SRX5546892 | SRP188943 | White muscle | 86.42 |
| **SRR8756210** | SRX5546891 | SRP188943 | Red muscle | 72.04 |
| **SRR8756211** | SRX5546890 | SRP188943 | Red muscle | 76.56 |
| **SRR8756212** | SRX5546889 | SRP188943 | White muscle | 71.20 |
| **SRR8756213** | SRX5546888 | SRP188943 | White muscle | 86.22 |

**﻿**

**Table S2.** Full-genome protein sequence information of twelve representative fish species.

| **Information on full-genome protein sequences of four tuna species (Upper part)** | | | | | |
| --- | --- | --- | --- | --- | --- |
| **Species** | **Common name** | **Scaffold N50 (Mb)** | **Genome size (Mb)** | **protein-coding genes** | **Reference or Accession** |
| *Thunnus albacares* | Yellowfin tuna | 34.6 | 792.1 | 24,623 | GCF_914725855.1 |
| *Thunnus maccoyii* | Southern bluefin tuna | 33.8 | 782.4 | 24,659 | GCF_910596095.1 |
| *Euthynnus affinis* | Eastern little tuna | 29.1 | 758.24 | 23,059 | GCA_019973915.1  [[1]](https://paperpile.com/c/BD5lzJ/KqSR) |
| *Katsuwonus pelamis* | skipjack tuna | 32.7 | 827.9 | 32,001 | GCA_041053085.1  [[2]](https://paperpile.com/c/BD5lzJ/PeKg) |
| **Information on full-genome protein sequences of representative fish species (Lower part)** | | | | | |
| **Species** | **Common name** | **Scaffold N50 (Mb)** | **Genome size (Mb)** | **protein-coding genes** | **Reference or Accession** |
| *Seriola lalandi dorsalis* | Yellowtail amberjack | 1.3 | 732 | 25,573 | GCF_002814215.1 |
| *Oryzias latipes* | Japanese medaka | 31.2 | 734 | 22,070 | GCF_002234675.1 |
| *Anabas testudineus* | climbing perch | 25.1 | 555.6 | 23,846 | GCF_900324465.2 |
| *Danio rerio* | zebrafish | 59.3 | 1400 | 27,039 | GCF_049306965.1 |
| *Gasterosteus aculeatus* | three-spined stickleback | 20.4 | 471.9 | 22,598 | GCF_016920845.1 |
| *Hippocampus comes* | tiger tail seahorse | 2 | 492.1 | 21,184 | GCF_001891065.2 |

**Table S3. Statistical results of the 24 pseudochromosomes of the improved *T. orientalis* genome.**

| **Chromosome in the present assembly** | **Size (bp)** | **GC content (%)** | **Percentage of the genome** |
| --- | --- | --- | --- |
| 1 | 39,217,975 | 39.41 | 4.93 |
| 2 | 21,523,452 | 39.38 | 2.71 |
| 3 | 42,023,264 | 39.25 | 5.28 |
| 4 | 36,104,902 | 39.45 | 4.54 |
| 5 | 38,264,006 | 39.42 | 4.81 |
| 6 | 36,199,720 | 39.65 | 4.55 |
| 7 | 36,250,107 | 39.6 | 4.56 |
| 8 | 30,911,443 | 39.82 | 3.89 |
| 9 | 37,149,219 | 39.45 | 4.67 |
| 10 | 35,532,070 | 39.46 | 4.47 |
| 11 | 30,792,284 | 39.56 | 3.87 |
| 12 | 31,066,550 | 39.12 | 3.9 |
| 13 | 36,486,977 | 39.61 | 4.59 |
| 14 | 32,769,959 | 39.2 | 4.12 |
| 15 | 31,795,176 | 39.67 | 4 |
| 16 | 34,973,738 | 39.49 | 4.4 |
| 17 | 34,195,991 | 39.23 | 4.3 |
| 18 | 27,360,815 | 39.98 | 3.44 |
| 19 | 28,941,527 | 39.57 | 3.64 |
| 20 | 28,328,389 | 39.61 | 3.56 |
| 21 | 34,078,809 | 39.44 | 4.28 |
| 22 | 30,535,465 | 39.92 | 3.84 |
| 23 | 26,838,675 | 39.53 | 3.37 |
| 24 | 30,504,448 | 39.4 | 3.83 |
| Total | 791,844,961 |  | 99.55 |

**Table S4. Major categories and quantities of repeat elements in the *T. orientalis* genome assembly.** Elements with apercentage of 0 were deleted from this table.

==================================================

number of length percentage

elements* occupied of sequence

--------------------------------------------------

Retroelements 108280 30580663 bp 3.84 %

SINEs: 9912 1533091 bp 0.19 %

LINEs: 91987 25797628 bp 3.24 %

L2/CR1/Rex 56328 17107701 bp 2.15 %

R1/LOA/Jockey 6807 977754 bp 0.12 %

R2/R4/NeSL 1368 758371 bp 0.10 %

RTE/Bov-B 9783 2327692 bp 0.29 %

L1/CIN4 4204 1868838 bp 0.23 %

LTR elements: 6381 3249944 bp 0.41 %

BEL/Pao 298 428049 bp 0.05 %

Gypsy/DIRS1 2727 1236894 bp 0.16 %

Retroviral 2832 1209248 bp 0.15 %

DNA transposons 79928 17004590 bp 2.14 %

hobo-Activator 31517 6888111 bp 0.87 %

Tc1-IS630-Pogo 39150 7630273 bp 0.96 %

Tourist/Harbinger 2114 531597 bp 0.07 %

Rolling-circles 184 142448 bp 0.02 %

Unclassified: 1088539 174264846 bp 21.90 %

Total interspersed repeats: 221873174 bp 27.89 %

Small RNA: 7542 1411561 bp 0.18 %

Satellites: 719 85310 bp 0.01 %

Simple repeats: 384820 17103504 bp 2.15 %

Low complexity: 46814 2638066 bp 0.33 %

==================================================

* most repeats are fragmented by insertions or deletions

have been counted as one element

**Table S5. Summary of functional annotation of predicted proteins.**

|  | **Database** | **Count** | **Percentage (%)** |
| --- | --- | --- | --- |
| **Total genes** |  | 22,640 |  |
| **InterProScan** | PANTHER | 20,235 | 89.38 |
| **InterProScan** | Pfam | 17,403 | 76.86 |
| **InterProScan** | Gene3D | 16,399 | 72.43 |
| **InterProScan** | SUPERFAMILY | 15,242 | 67.32 |
| **InterProScan** | FunFam | 11,994 | 52.97 |
| **InterProScan** | SMART | 8,562 | 37.81 |
| **InterProScan** | CDD | 8,932 | 39.45 |
| **InterProScan** | PRINTS | 5,068 | 22.38 |
| **InterProScan** | PIRSF | 1,568 | 6.92 |
| **InterProScan** | NCBIfam | 1,231 | 5.43 |
| **InterProScan** | SFLD | 101 | 0.45 |


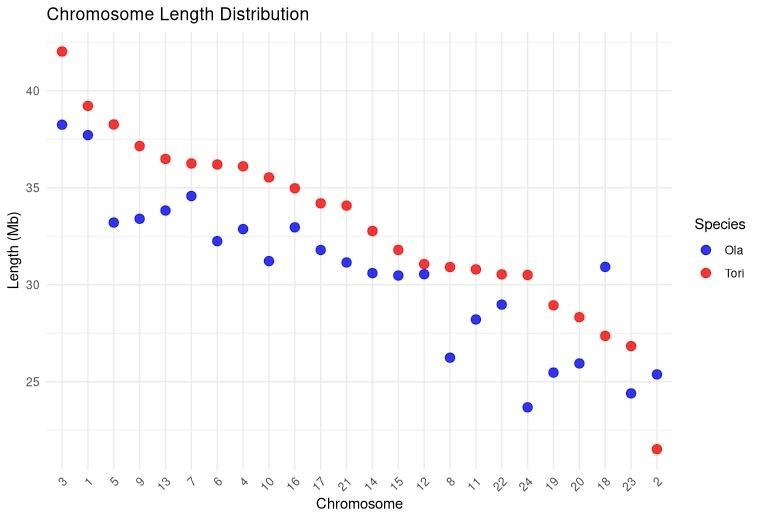

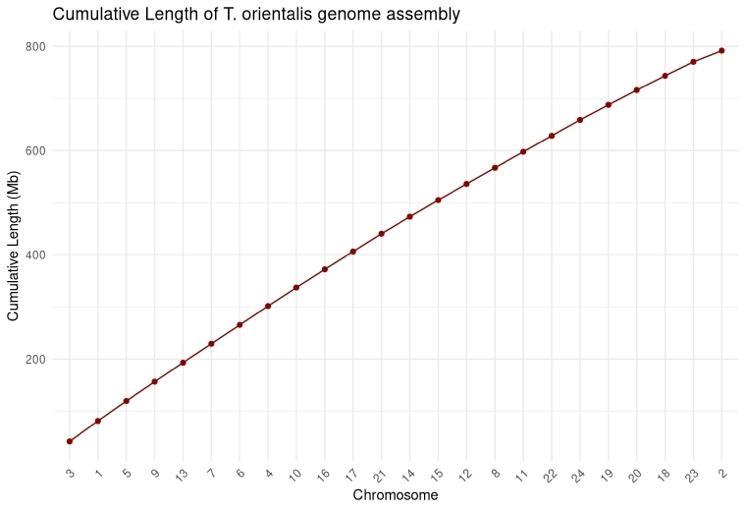


**Figure S1**. **Length distribution of the *Thunnus orientalis* genome assembly.** (Upper) The length of the 24 longest scaffolds in the assembly. Red points represent pseudochromosomes ordered according to gene-level synteny with the Japanese medaka, *Oryzias latipes* (blue points). (Bottom) Cumulative length of the *T. orientalis* genome assembly.

**References**

[1. Havelka M, Sawayama E, Saito T, Yoshitake K, Saka D, Ineno T, et al. Chromosome-scale genome assembly and transcriptome assembly of kawakawa Euthynnus affinis; A tuna-like species. Front Genet. 2021;12:739781.](http://paperpile.com/b/BD5lzJ/KqSR)

[2. Liang X, Huang J, Liu B, Wu F, Liu J, Lu J. A chromosome-level genome assembly of skipjack tuna, Katsuwonus pelamis (Perciformes: Scombridae). Sci Data. 2024;11:1405.](http://paperpile.com/b/BD5lzJ/PeKg)
