# Supplementary material for: Genome Refinement in Pacific Bluefin Tuna (Thunnus orientalis): Chromosome-level Assembly Using Hybrid Linkage Data
Source: Research Square preprint supplement (doi:10.21203/rs.3.rs-7883235/v1), 2025-11-04
Supplement: Supplementary file 2 [file 70a6a4e337928a11b6245142.xlsx]

## Sheet: Sheet1
KO	gene_count	KO_definition
K09228	55	KRAB domain-containing zinc finger protein
K06087	50	claudin
K09191	44	general transcription factor IIIA
K06553	39	pre-B lymphocyte gene
K12006	37	tripartite motif-containing protein 16
K23284	33	C1q-related factor
K23483	30	gamma-crystallin
K11253	27	histone H3
K11251	27	histone H2A
K12012	26	tripartite motif-containing protein 35
K11252	23	histone H2B
K04257	23	olfactory receptor
K22614	23	NLR family CARD domain-containing protein 3
K14480	22	apolipoprotein L
K11275	20	histone H1/5
K00699	18	glucuronosyltransferase [EC:2.4.1.17]
K16449	17	regulator of G-protein signaling
K00710	17	polypeptide N-acetylgalactosaminyltransferase [EC:2.4.1.41]
K04613	16	vomeronasal 2 receptor
K08402	15	hydroxycarboxylic acid receptor 2/3
K06055	15	hairy and enhancer of split 5
K04234	15	coagulation factor II (thrombin) receptor-like 1
K07374	14	tubulin alpha
K15049	14	endonuclease domain-containing 1 protein
K04299	14	P2Y purinoceptor 14
K07604	13	type I keratin, acidic
K04358	13	fibroblast growth factor
K14165	12	atypical dual specificity phosphatase [EC:3.1.3.16 3.1.3.48]
K06752	12	MHC class II antigen
K13822	11	hemoglobin subunit alpha
K16817	10	HRAS-like suppressor 3 [EC:3.1.1.32 3.1.1.4]
K04245	10	chemokine-like receptor 1
K14387	10	solute carrier family 5 (high affinity choline transporter), member 7
K07189	10	protein phosphatase 1 regulatory subunit 3A/B/C/D/E
K23482	9	beta-crystallin
K06058	9	deltex [EC:2.3.2.27]
K06521	9	semaphorin 4
K00799	9	glutathione S-transferase [EC:2.5.1.18]
K23222	9	nuclease HARBI1 [EC:3.1.-.-]
K27569	9	protein eva-1
K06712	9	butyrophilin
K06751	9	MHC class I antigen
K18080	9	tensin
K03260	9	translation initiation factor 4G
K19928	9	zona pellucida sperm-binding protein 3
K07818	9	perforin 1
K23893	9	LHFPL tetraspan subfamily member protein
K14360	8	organic solute transporter subunit alpha
K01197	8	hyaluronoglucosaminidase [EC:3.2.1.35]
K01080	8	phosphatidate phosphatase [EC:3.1.3.4]
K22038	8	volume-regulated anion channel
K07375	8	tubulin beta
K24205	8	protein lifeguard
K24889	8	iroquois-class homeodomain protein IRX
K13823	8	hemoglobin subunit beta
K05462	8	ephrin-A
K01025	7	sulfotransferase [EC:2.8.2.-]
K16499	7	protocadherin delta 2
K08328	7	guanylate cyclase activator 1
K04429	7	thousand and one amino acid protein kinase [EC:2.7.11.1]
K16495	7	protocadherin gamma subfamily A
K01312	7	trypsin [EC:3.4.21.4]
K09349	7	homeobox protein Nkx-5
K01530	7	phospholipid-translocating ATPase [EC:7.6.2.1]
K18441	7	cytohesin
K19894	7	sperm acrosome membrane-associated protein 4
K01672	7	carbonic anhydrase [EC:4.2.1.1]
K19871	7	sal-like protein
K17270	7	myelin-oligodendrocyte glycoprotein
K17308	7	alpha-1-acid glycoprotein
K19995	7	secretory carrier-associated membrane protein
K06840	7	semaphorin 3
K23533	7	leucine-rich repeat and immunoglobulin-like domain-containing nogo receptor-interacting protein
K17594	7	phosphatase and actin regulator
K04153	7	5-hydroxytryptamine receptor 1
K10356	7	myosin I
K20123	7	protein kinase C and casein kinase substrate in neurons protein
K05849	7	solute carrier family 8 (sodium/calcium exchanger)
K14443	7	protein Tob/BTG
K23855	6	Kv channel-interacting protein
K09267	6	transcription factor SOX1/3/14/21 (SOX group B)
K23930	6	protein FAM83
K14684	6	solute carrier family 25 (mitochondrial phosphate transporter), member 23/24/25/41
K00876	6	uridine kinase [EC:2.7.1.48]
K01183	6	chitinase [EC:3.2.1.14]
K04265	6	adenosine receptor A1
K06258	6	MFS transporter, VNT family, synaptic vesicle glycoprotein 2
K23949	6	sterile alpha motif domain-contaning protein 9
K08385	6	G0-opsin
K19363	6	lipopolysaccharide-induced tumor necrosis factor-alpha factor
K08858	6	serine/threonine-protein kinase SBK [EC:2.7.11.1]
K01158	6	deoxyribonuclease II [EC:3.1.22.1]
K06867	6	uncharacterized protein
K05190	6	gamma-aminobutyric acid receptor subunit rho
K06856	6	immunoglobulin heavy chain
K06580	6	ammonium transporter Rh
K24190	6	lens fiber membrane intrinsic protein
K04402	6	growth arrest and DNA-damage-inducible protein
K24990	6	RNA-binding motif, single-stranded-interacting protein
K00657	6	diamine N-acetyltransferase [EC:2.3.1.57]
K11593	6	eukaryotic translation initiation factor 2C
K06771	6	myelin associated glycoprotein
K00901	6	diacylglycerol kinase (ATP) [EC:2.7.1.107]
K13907	6	cystatin-A/B
K26229	6	arrestin domain-containing protein 2/3
K01081	6	5'-nucleotidase [EC:3.1.3.5]
K01047	6	secretory phospholipase A2 [EC:3.1.1.4]
K17349	6	tetraspanin-8
K03283	6	heat shock 70kDa protein 1/6/8
K03327	6	MATE family, multidrug and toxin extrusion protein
K04739	6	cAMP-dependent protein kinase regulator
K03259	6	translation initiation factor 4E
K18668	6	ribonuclease ZC3H12 [EC:3.1.-.-]
K09114	6	MAX dimerization protein
K09869	6	aquaporin-8
K24491	6	leucine-rich repeat, immunoglobulin-like domain and transmembrane domain-containing protein
K01771	6	1-phosphatidylinositol phosphodiesterase [EC:4.6.1.13]
K07945	6	ADP-ribosylation factor-like protein 4
K18543	6	choriolysin H [EC:3.4.24.67]
K23740	6	SH3 domain-binding glutamic acid-rich protein
K16143	5	C-reactive protein
K24510	5	von Willebrand factor A domain-containing protein 5
K21846	5	transmembrane protein 150
K20029	5	palmitoyltransferase ZDHHC3/7/25 [EC:2.3.1.225]
K20526	5	transgelin
K25447	5	olfactomedin-4
K18625	5	protein Shroom
K09365	5	POU domain transcription factor, class 3
K24511	5	von Willebrand factor A domain-containing protein 7
K00940	5	nucleoside-diphosphate kinase [EC:2.7.4.6]
K03916	5	bradykinin receptor B2
K21918	5	BTB/POZ domain-containing protein KCTD8/12/16
K07192	5	flotillin
K23697	5	SH2 domain-containing adapter protein B/D/E/F
K15259	5	poly [ADP-ribose] polymerase 7/11/12/13 [EC:2.4.2.30]
K06829	5	insulin-like growth factor-binding protein 10
K24943	5	tetratricopeptide repeat protein 39
K21988	5	transmembrane channel-like protein
K24495	5	myomesin
K14946	5	RNA binding protein fox-1
K00889	5	1-phosphatidylinositol-4-phosphate 5-kinase [EC:2.7.1.68]
K10223	5	cholesterol 25-hydroxylase [EC:1.14.99.38]
K16519	5	A-kinase anchor protein 2
K07200	5	5'-AMP-activated protein kinase, regulatory gamma subunit
K23781	5	Arf-GAP with dual PH domain-containing protein
K23797	5	pleckstrin homology domain-containing family A member 4/5/6/7
K14943	5	muscleblind
K18808	5	toll-like receptor 13
K08397	5	relaxin family peptide receptor 3
K11247	5	endophilin-A
K07605	5	type II keratin, basic
K00844	5	hexokinase [EC:2.7.1.1]
K11584	5	serine/threonine-protein phosphatase 2A regulatory subunit B'
K08486	5	syntaxin 1B/2/3
K01251	5	adenosylhomocysteinase [EC:3.13.2.1]
K08487	5	syntaxin 11
K12495	5	IQ motif and SEC7 domain-containing protein
K04513	5	Ras homolog gene family, member A
K07820	5	beta-1,3-galactosyltransferase 2 [EC:2.4.1.86]
K02270	5	cytochrome c oxidase subunit 7a
K05071	5	interleukin 4 receptor
K00789	5	S-adenosylmethionine synthetase [EC:2.5.1.6]
K10352	5	myosin heavy chain 9/10/11/14
K17271	5	myelin proteolipid protein
K07378	5	neuroligin
K04630	5	guanine nucleotide-binding protein G(i) subunit alpha
K09397	5	forkhead box protein D
K07373	5	gap junction delta-2 protein
K23531	5	calcium-binding protein 1/2/4/5
K04459	5	dual specificity MAP kinase phosphatase [EC:3.1.3.16 3.1.3.48]
K13293	5	cAMP-specific phosphodiesterase 4 [EC:3.1.4.53]
K20642	5	Rho GTPase-activating protein 22/24/25
K03948	5	NADH dehydrogenase (ubiquinone) 1 alpha subcomplex subunit 4
K01581	5	ornithine decarboxylase [EC:4.1.1.17]
K12043	5	troponin I, fast skeletal muscle
K13825	5	hemoglobin subunit epsilon
K06492	5	CD58 antigen
K08869	5	aarF domain-containing kinase
K06467	5	CD22 antigen
K17599	5	transmembrane protein 132
K27704	5	microtubule cross-linking factor
K25709	5	neuronal pentraxin
K06269	5	serine/threonine-protein phosphatase PP1 catalytic subunit [EC:3.1.3.16]
K17608	5	striatin 1/3/4
K09239	5	human immunodeficiency virus type I enhancer-binding protein
K00485	5	dimethylaniline monooxygenase (N-oxide forming) / hypotaurine monooxygenase [EC:1.14.13.8 1.8.1.-]
K15122	5	solute carrier family 41
K25409	5	microfibrillar-associated protein 4
K09223	5	growth factor independent 1
K24246	5	emilin
K14007	5	protein transport protein SEC24
K14445	5	solute carrier family 13 (sodium-dependent dicarboxylate transporter), member 2/3/5
K04256	5	c-opsin
K09220	5	IKAROS family zinc finger protein
K00432	5	glutathione peroxidase [EC:1.11.1.9]
K04250	5	rhodopsin
K09048	5	cyclic AMP-responsive element-binding protein 3
K22990	5	torsin-1
K02649	5	phosphoinositide-3-kinase regulatory subunit alpha/beta/delta
K09069	5	twist
K22808	5	KN motif and ankyrin repeat domain-containing protein
K10703	5	very-long-chain (3R)-3-hydroxyacyl-CoA dehydratase [EC:4.2.1.134]
K05857	5	phosphatidylinositol phospholipase C, delta [EC:3.1.4.11]
K05853	5	P-type Ca2+ transporter type 2A [EC:7.2.2.10]
K17598	5	synaptotagmin-like protein
K04441	5	p38 MAP kinase [EC:2.7.11.24]
K10478	5	BTB/POZ domain-containing protein 3/6
K06566	5	interferon induced transmembrane protein
K06685	5	MOB kinase activator 1
K15183	5	RNA polymerase II elongation factor ELL
K25857	5	AT-rich interactive domain-containing protein 5
K08832	5	serine/threonine-protein kinase SRPK3 [EC:2.7.11.1]
K04328	5	free fatty acid receptor 2
K17923	5	sorting nexin-9/18/33
K05414	5	interferon alpha
K12185	5	ESCRT-I complex subunit VPS37
K12160	5	small ubiquitin-related modifier
K09304	5	homeobox protein HoxA/B/C/D4
K16197	4	14-3-3 protein beta/theta/zeta
K11964	4	pellino [EC:2.3.2.27]
K09341	4	homeobox protein MSX
K08202	4	MFS transporter, OCT family, solute carrier family 22 (organic cation transporter), member 4/5
K17310	4	serum amyloid A protein
K08204	4	MFS transporter, OCT family, solute carrier family 22 (organic anion transporter), member 7
K08209	4	MFS transporter, OCT family, solute carrier family 22 (organic cation transporter), member 13
K04140	4	adrenergic receptor alpha-2C
K04658	4	noggin
K01623	4	fructose-bisphosphate aldolase, class I [EC:4.1.2.13]
K17307	4	fibulin 1/2
K04393	4	cell division control protein 42
K17306	4	armadillo repeat-containing protein 1
K19041	4	E3 ubiquitin-protein ligase RNF38/44 [EC:2.3.2.27]
K16302	4	metal transporter CNNM
K16310	4	serine/threonine-protein kinase NIM1 [EC:2.7.11.1]
K08291	4	G protein-coupled receptor kinase [EC:2.7.11.16]
K23926	4	parvalbumin alpha
K04634	4	guanine nucleotide-binding protein G(q) subunit alpha
K25746	4	V-set and transmembrane domain-containing protein 2
K09219	4	scratch
K04679	4	MAD, mothers against decapentaplegic interacting protein
K20030	4	palmitoyltransferase ZDHHC5/8 [EC:2.3.1.225]
K09565	4	peptidyl-prolyl isomerase F (cyclophilin D) [EC:5.2.1.8]
K18753	4	butyrate response factor
K24220	4	myosin heavy chain 1/2/3/4/8/13/7B/15
K09093	4	aryl hydrocarbon receptor
K01425	4	glutaminase [EC:3.5.1.2]
K24222	4	inositol polyphosphate 5-phosphatase INPP5J/K [EC:3.1.3.56]
K09087	4	hairy and enhancer of split 2/6/7
K27702	4	spindlin
K09083	4	atonal protein 1/7
K18739	4	protein bicaudal D
K15731	4	carboxy-terminal domain RNA polymerase II polypeptide A small phosphatase [EC:3.1.3.16]
K01068	4	acyl-coenzyme A thioesterase 1/2/4 [EC:3.1.2.2]
K09319	4	homeobox protein engrailed
K09070	4	transcription factor 15
K01074	4	palmitoyl-protein thioesterase [EC:3.1.2.22]
K24235	4	cerebellin
K01076	4	abhydrolase domain-containing protein 17 [EC:3.1.2.22]
K04228	4	arginine vasopressin receptor 2
K20463	4	oxysterol-binding protein-related protein 3/6/7
K09059	4	nuclear factor, interleukin 3 regulated
K04703	4	sprouty-related, EVH1 domain-containing protein
K18756	4	protein bicaudal C
K09207	4	krueppel-like factor 6/7
K18763	4	la-related protein 4
K01084	4	glucose-6-phosphatase [EC:3.1.3.9]
K01092	4	myo-inositol-1(or 4)-monophosphatase [EC:3.1.3.25]
K04241	4	urotensin 2 receptor
K09568	4	FK506-binding protein 1 [EC:5.2.1.8]
K00121	4	S-(hydroxymethyl)glutathione dehydrogenase / alcohol dehydrogenase [EC:1.1.1.284 1.1.1.1]
K09303	4	homeobox protein HoxA/B/D3
K16580	4	SLAIN motif-containing protein 1/2
K08864	4	tousled-like kinase [EC:2.7.11.1]
K04511	4	prickle
K12484	4	Rab11 family-interacting protein 1/2/5
K12474	4	low density lipoprotein receptor adapter protein 1
K09407	4	forkhead box protein N
K01897	4	long-chain acyl-CoA synthetase [EC:6.2.1.3]
K08868	4	alpha-kinase
K01365	4	cathepsin L [EC:3.4.22.15]
K17277	4	epidermal growth factor receptor kinase substrate 8
K03783	4	purine-nucleoside phosphorylase [EC:2.4.2.1]
K04496	4	C-terminal binding protein [EC:1.1.1.428]
K09269	4	transcription factor SOX5/6/13 (SOX group D)
K20028	4	palmitoyltransferase ZDHHC2/15/20 [EC:2.3.1.225]
K04515	4	calcium/calmodulin-dependent protein kinase (CaM kinase) II [EC:2.7.11.17]
K20102	4	YTH domain-containing family protein
K08601	4	ubiquitin carboxyl-terminal hydrolase CYLD [EC:3.4.19.12]
K09275	4	transcription factor CP2 and related proteins
K01915	4	glutamine synthetase [EC:6.3.1.2]
K19895	4	GDNF family receptor alpha
K09298	4	homeobox protein HoxA/B/C/D13
K12404	4	ADP-ribosylation factor-binding protein GGA
K09301	4	homeobox protein HoxA/B/D1
K08838	4	serine/threonine-protein kinase 24/25/MST4 [EC:2.7.11.1]
K04456	4	RAC serine/threonine-protein kinase [EC:2.7.11.1]
K12394	4	AP-1 complex subunit sigma 1/2
K01527	4	nascent polypeptide-associated complex subunit beta
K09428	4	E74-like factor 1/2/4
K04622	4	G protein-coupled receptor family C group 6 member A
K17293	4	tetraspanin-3
K20044	4	phosphatidylinositol-binding clathrin assembly protein
K08765	4	carnitine O-palmitoyltransferase 1, liver isoform [EC:2.3.1.21]
K16362	4	leucine-rich repeat transmembrane protein FLRT
K11997	4	tripartite motif-containing protein 2/3
K04614	4	vomeronasal 1 receptor
K12336	4	natriuretic peptide C
K17199	4	Ras and EF-hand domain-containing protein
K20314	4	arfaptin
K04345	4	protein kinase A [EC:2.7.11.11]
K08747	4	solute carrier organic anion transporter family, member 1C
K23957	4	formic-like protein
K08414	4	G protein-coupled receptor 61
K12489	4	Arf-GAP with coiled-coil, ANK repeat and PH domain-containing protein
K09366	4	POU domain transcription factor, class 4
K16938	4	septin 3/9/12
K16463	4	centrosomal protein CEP170
K24627	4	growth arrest-specific protein 2
K20217	4	ubiquitin-conjugating enzyme E2 E [EC:2.3.2.23]
K19530	4	junctophilin
K04282	4	thyrotropin-releasing hormone receptor
K04537	4	guanine nucleotide-binding protein G(I)/G(S)/G(T) subunit beta-2
K03662	4	V-type H+-transporting ATPase S1 subunit
K24621	4	very-long-chain ceramide synthase [EC:2.3.1.297]
K20163	4	DENN domain-containing protein 4
K04008	4	CD59 antigen
K16498	4	protocadherin delta 1
K05152	4	tumor necrosis factor receptor superfamily member 14
K10429	4	microtubule-associated protein 1
K00728	4	dolichyl-phosphate-mannose-protein mannosyltransferase [EC:2.4.1.109]
K13506	4	glycerol-3-phosphate O-acyltransferase 3/4 [EC:2.3.1.15]
K00280	4	lysyl oxidase-like protein 2/3/4 [EC:1.4.3.-]
K15272	4	solute carrier family 35 (UDP-sugar transporter), member A1/2/3
K26797	4	golgi reassembly-stacking protein
K26808	4	taxilin
K02978	4	small subunit ribosomal protein S27e
K00731	4	glycoprotein-N-acetylgalactosamine 3-beta-galactosyltransferase [EC:2.4.1.122]
K26813	4	XK-related protein 8
K10435	4	microtubule-associated protein 1 light chain
K10448	4	kelch-like protein 10
K27835	4	glutamine amidotransferase-like class 1 domain-containing protein 3, mitochondrial
K26935	4	cell cycle control protein 50
K06689	4	ubiquitin-conjugating enzyme E2 D [EC:2.3.2.23]
K24919	4	transmembrane 4 L6 family member 4
K10371	4	troponin I, slow skeletal muscle
K07560	4	D-aminoacyl-tRNA deacylase [EC:3.1.1.96]
K21437	4	ankyrin repeat domain-containing protein 13
K07521	4	netrin receptor unc-5
K05046	4	solute carrier family 6 (neurotransmitter transporter, GABA) member 13
K05048	4	solute carrier family 6 (neurotransmitter transporter, amino acid/orphan) member 15/16/17/18/20
K13210	4	far upstream element-binding protein
K00277	4	protein-lysine 6-oxidase [EC:1.4.3.13]
K26544	4	phosphatidylinositol/phosphatidylcholine transfer protein
K07424	4	cytochrome P450 family 3 subfamily A [EC:1.14.14.1]
K23480	4	zinc finger protein 362/384
K02273	4	cytochrome c oxidase subunit 8
K26600	4	TLC domain-containing protein 3
K10354	4	actin, alpha skeletal muscle
K21599	4	circadian-associated transcriptional repressor
K07297	4	adiponectin receptor
K17493	4	calmodulin-regulated spectrin-associated protein
K06671	4	cohesin complex subunit SA-1/2
K22146	4	gasdermin-E
K25006	4	RNA-binding protein 24/38
K02602	4	cytoplasmic polyadenylation element-binding protein
K17609	4	nucleoredoxin [EC:1.8.1.8]
K06237	4	collagen type IV alpha
K10582	4	ubiquitin-conjugating enzyme E2 Q [EC:2.3.2.23]
K23033	4	terminal nucleotidyltransferase 5A/B [EC:2.7.7.-]
K15107	4	solute carrier family 25 (mitochondrial glutamate transporter), member 18/22
K22641	4	protein tweety
K22733	4	magnesium transporter
K06571	4	tetraspanin-7
K15031	4	mitochondrial transcription termination factor family protein
K10694	4	E3 ubiquitin-protein ligase ZNRF1/2 [EC:2.3.2.27]
K05948	4	fringe [EC:2.4.1.222]
K15014	4	solute carrier family 29 (equilibrative nucleoside transporter), member 1/2/3
K15010	4	homer
K22904	4	presqualene diphosphate phosphatase [EC:3.1.3.-]
K06238	4	collagen type VI alpha
K06265	4	dystroglycan 1
K17854	4	cytochrome P450 family 2 subfamily K [EC:1.14.-.-]
K22529	4	amphoterin-induced protein
K22525	4	MKL/myocardin-like protein
K10524	4	nicotinamide/nicotinate riboside kinase [EC:2.7.1.22 2.7.1.173]
K00522	4	ferritin heavy chain [EC:1.16.3.1]
K00544	4	betaine-homocysteine S-methyltransferase [EC:2.1.1.5]
K22413	4	fibroblast growth factor 11/12/13
K06499	4	carcinoembryonic antigen-related cell adhesion molecule
K06519	4	solute carrier family 3, member 2
K27240	4	CLOCK-interacting pacemaker
K00019	4	3-hydroxybutyrate dehydrogenase [EC:1.1.1.30]
K10486	4	BTB/POZ domain-containing protein 14
K00573	4	protein-L-isoaspartate(D-aspartate) O-methyltransferase [EC:2.1.1.77]
K06560	4	mannose receptor, C type
K05463	4	ephrin-B
K07526	4	SLIT-ROBO Rho GTPase activating protein
K04179	4	C-C chemokine receptor type 4
K07566	4	L-threonylcarbamoyladenylate synthase [EC:2.7.7.87]
K10203	4	elongation of very long chain fatty acids protein 6 [EC:2.3.1.199]
K23687	4	Ras and Rab interactor 2/3
K24775	4	WW domain-binding protein 1
K26401	4	target of Myb membrane trafficking protein 1 and related proteins
K00920	4	1-phosphatidylinositol-5-phosphate 4-kinase [EC:2.7.1.149]
K18622	4	adducin
K26409	4	interferon alpha-inducible protein 27
K18405	4	tudor domain-containing protein 1/4/6/7
K15686	4	RNA-binding protein MEX3 [EC:2.3.2.27]
K07843	4	RAS, dexamethasone-induced Ras-related protein 1
K00898	4	pyruvate dehydrogenase kinase 2/3/4 [EC:2.7.11.2]
K13073	4	polymeric immunoglobulin receptor
K13126	4	polyadenylate-binding protein
K20636	4	Rho GTPase-activating protein 12/27
K02183	4	calmodulin
K10062	4	collectin sub-family member 12
K00909	4	rhodopsin kinase [EC:2.7.11.14]
K00948	4	ribose-phosphate pyrophosphokinase [EC:2.7.6.1]
K00911	4	1D-myo-inositol-triphosphate 3-kinase [EC:2.7.1.127]
K13094	4	RNA-binding protein 5/10
K00939	4	adenylate kinase [EC:2.7.4.3]
K10135	4	scotin
K03145	4	transcription elongation factor S-II
K25535	4	fibroblast growth factor-binding protein
K23739	4	SH3-domain binding protein 5
K09855	4	Ras association domain-containing protein 7/8
K07994	4	matrix metalloproteinase-13 (collagenase 3) [EC:3.4.24.-]
K23847	4	hippocalcin-like protein 1
K20632	4	deleted in liver cancer protein
K11150	4	retinol dehydrogenase 8 [EC:1.1.1.-]
K13194	4	double stranded RNA-specific editase B [EC:3.5.-.-]
K18246	4	carbonic anhydrase 4 [EC:4.2.1.1]
K11153	4	retinol dehydrogenase 12 [EC:1.1.1.300]
K07612	4	gap junction alpha-3 protein
K12893	4	serine/arginine-rich splicing factor 4/5/6
K11168	4	dehydrogenase/reductase SDR family member 12 [EC:1.1.-.-]
K03098	4	apolipoprotein D and lipocalin family protein
K07623	4	gap junction beta-4 protein
K07905	4	Ras-related protein Rab-11B
K04079	3	molecular chaperone HtpG
K25361	3	transmembrane 6 superfamily
K05840	3	dopamine receptor D5
K10523	3	speckle-type POZ protein
K17822	3	DCN1-like protein 1/2
K10657	3	E3 ubiquitin-protein ligase MARCH2/3 [EC:2.3.2.27]
K09210	3	krueppel-like factor 15
K03985	3	plasminogen activator, urokinase receptor
K17885	3	mitochondrial carrier
K02891	3	large subunit ribosomal protein L22e
K17894	3	GATA-binding protein 2
K09208	3	krueppel-like factor 9/13/14/16
K17908	3	autophagy-related protein 18
K03424	3	TatD DNase family protein [EC:3.1.21.-]
K09173	3	regulatory factor X 1/2/3
K10696	3	E3 ubiquitin-protein ligase BRE1 [EC:2.3.2.27]
K17776	3	metaxin
K04174	3	apelin receptor
K09664	3	beta-1,3-N-acetylglucosaminyltransferase 7 [EC:2.4.1.-]
K17924	3	sorting nexin-10/11
K09270	3	transcription factor SOX7/8/10/18 (SOX group E/F)
K18932	3	palmitoyltransferase [EC:2.3.1.225]
K10055	3	zinc finger and BTB domain-containing protein 16
K18684	3	hydroperoxy icosatetraenoate dehydratase/isomerase [EC:4.2.1.152 5.4.4.7]
K09236	3	teashirt
K24787	3	RUN domain-containing protein 3
K04160	3	5-hydroxytryptamine receptor 4
K17724	3	aconitate decarboxylase [EC:4.1.1.6]
K02896	3	large subunit ribosomal protein L24e
K10575	3	ubiquitin-conjugating enzyme E2 G1 [EC:2.3.2.23]
K10573	3	ubiquitin-conjugating enzyme E2 A [EC:2.3.2.23]
K02739	3	20S proteasome subunit beta 2 [EC:3.4.25.1]
K03231	3	elongation factor 1-alpha
K25350	3	ALK and LTK ligand
K18592	3	gamma-glutamyltranspeptidase / glutathione hydrolase / leukotriene-C4 hydrolase [EC:2.3.2.2 3.4.19.13 3.4.19.14]
K02857	3	rhomboid-related protein 1/2/3 [EC:3.4.21.105]
K25100	3	Msx2-interacting protein
K25218	3	aftiphilin
K19581	3	lipid phosphate phosphatase-related protein type 1/2/5
K09575	3	FK506-binding protein 9/10 [EC:5.2.1.8]
K18749	3	protein LSM14
K09627	3	serine protease 23 [EC:3.4.21.-]
K18422	3	helicase MOV-10 [EC:5.6.2.5]
K09305	3	homeobox protein HoxA/B/C5
K10476	3	kelch repeat and BTB domain-containing protein 11
K09501	3	serpin peptidase inhibitor, clade H, member 1
K03263	3	translation initiation factor 5A
K10370	3	tropomodulin
K09381	3	paired box protein 3/7
K09385	3	forkhead box protein G
K24891	3	homeobox protein PKNOX
K10357	3	myosin V
K24887	3	GTP-binding protein 1
K03593	3	ATP-binding protein involved in chromosome partitioning
K10252	3	beta,beta-carotene 9',10'-dioxygenase [EC:1.13.11.71]
K09395	3	forkhead box protein B
K00182	3	wingless-type MMTV integration site family, member 2
K19347	3	SUN domain-containing protein 1/2
K10258	3	very-long-chain enoyl-CoA reductase [EC:1.3.1.93]
K09401	3	forkhead box protein I
K24885	3	homeobox-containing protein 1
K24835	3	glioma pathogenesis-related protein 2
K09403	3	forkhead box protein J2/3
K09404	3	forkhead box protein K
K03097	3	casein kinase II subunit alpha [EC:2.7.11.1]
K09427	3	Adh transcription factor 1
K18266	3	protein NDRG1
K10350	3	Zyg-11 protein
K10343	3	SPRY domain-containing SOCS box protein 1/4
K10337	3	ankyrin repeat and SOCS box protein 15
K03671	3	thioredoxin
K03663	3	4-galactosyl-N-acetylglucosaminide 3-alpha-L-fucosyltransferase [EC:2.4.1.152]
K10315	3	F-box protein 40
K24875	3	homeobox protein DBX
K09377	3	cysteine and glycine-rich protein
K10249	3	elongation of very long chain fatty acids protein 4 [EC:2.3.1.199]
K09525	3	DnaJ homolog subfamily C member 5
K24682	3	patched domain-containing protein
K09312	3	homeobox protein CDX1/4
K24687	3	AN1-type zinc finger protein 5/6
K18466	3	vacuolar protein sorting-associated protein 26A/B
K10462	3	kelch-like protein 25/37 (ectoderm-neural cortex protein)
K09322	3	homeobox protein MOX
K09445	3	interferon regulatory factor 4
K24982	3	ecto-NOX disulfide-thiol exchanger
K02962	3	small subunit ribosomal protein S17e
K10436	3	microtubule-associated protein, RP/EB family
K03129	3	transcription initiation factor TFIID subunit 4
K24492	3	leucine-rich repeat neuronal protein 1/2/3
K24501	3	PR domain zinc finger protein 1 [EC:2.1.1.-]
K18412	3	trinucleotide repeat-containing gene 6 protein
K10420	3	dynein light chain Tctex-type 1/3
K03120	3	transcription initiation factor TFIID TATA-box-binding protein
K10418	3	dynein light chain LC8-type
K19473	3	homeobox protein SIX3/6
K10407	3	kinesin light chain
K18041	3	protein tyrosine phosphatase type IVA [EC:3.1.3.48]
K09353	3	homeobox protein LBX
K10402	3	kinesin family member 20
K09360	3	BarH-like
K24930	3	tetratricopeptide repeat protein 9
K18078	3	protein tyrosine phosphatase domain-containing protein 1 [EC:3.1.3.-]
K24524	3	copine 1/2/3
K09373	3	LIM homeobox protein 2/9
K09375	3	LIM homeobox protein 6/8
K10393	3	kinesin family member 2/24
K18669	3	dual specificity tyrosine-phosphorylation-regulated kinase 2/3/4 [EC:2.7.12.1]
K18966	3	sulfinoalanine decarboxylase / aspartate 1-decarboxylase [EC:4.1.1.29 4.1.1.11]
K09113	3	MAX-like protein X
K05052	3	neuromedin U receptor 1
K23621	3	WAP, Kazal, immunoglobulin, Kunitz and NTR domain-containing protein
K07620	3	gap junction beta-1 protein
K07616	3	gap junction gamma-1 protein
K05012	3	chloride channel 3/4/5
K07597	3	desmoglein 2
K21283	3	bone morphogenetic protein 2
K21404	3	AT-hook-containing transcription factor
K07528	3	dihydropyrimidinase-like 2
K21413	3	ankyrin repeat and SAM domain-containing protein 1
K05050	3	C-X-C chemokine receptor type 2
K05051	3	trace amine associated receptor
K21444	3	poly(rC)-binding protein 3/4
K07756	3	inositol-hexakisphosphate 5-kinase [EC:2.7.4.21]
K23564	3	ER membrane protein complex subunit 3
K07418	3	cytochrome P450 family 2 subfamily J [EC:1.14.14.1 1.14.14.73 1.14.14.74 1.14.14.75]
K07377	3	neurexin
K07305	3	peptide-methionine (R)-S-oxide reductase [EC:1.8.4.12]
K21754	3	BTB/POZ domain-containing protein KCTD1/15
K07199	3	5'-AMP-activated protein kinase, regulatory beta subunit
K07187	3	insulin receptor substrate 2
K07151	3	dolichyl-diphosphooligosaccharide---protein glycosyltransferase [EC:2.4.99.18]
K14754	3	interferon-induced GTP-binding protein Mx
K23449	3	triadin
K05170	3	interleukin 1 receptor accessory protein-like
K21124	3	adaptor protein CIKS
K07766	3	diphosphoinositol-polyphosphate diphosphatase [EC:3.6.1.52]
K05175	3	gamma-aminobutyric acid receptor subunit alpha
K04880	3	potassium voltage-gated channel Shaker-related subfamily A member 7
K08025	3	homeobox protein HB9
K20683	3	Rho guanine nucleotide exchange factor 3/8
K20685	3	guanine nucleotide exchange factor MCF2
K04848	3	voltage-gated sodium channel type IV beta
K23793	3	pleckstrin homology-like domain family A
K23792	3	myosin phosphatase Rho-interacting protein
K23791	3	sesquipedalian
K07970	3	beta-1,3-N-acetylglucosaminyltransferase 3 [EC:2.4.1.146 2.4.1.149]
K07955	3	ADP-ribosylation factor-like protein 8
K07953	3	GTP-binding protein SAR1 [EC:3.6.5.-]
K07944	3	ADP-ribosylation factor-like protein 3
K07928	3	Ras-related protein Rab-40
K07809	3	[heparan sulfate]-glucosamine 3-sulfotransferase 3 [EC:2.8.2.30]
K07925	3	Ras-related protein Rab-39B
K23727	3	sphingoid base N-palmitoyltransferase [EC:2.3.1.291]
K07889	3	Ras-related protein Rab-5C
K07874	3	Ras-related protein Rab-1A
K20838	3	N-acetyltransferase 8 [EC:2.3.1.80 2.3.1.-]
K07861	3	Ras-related C3 botulinum toxin substrate 3
K20909	3	anthrax toxin receptor
K07837	3	Ras-related protein Rap-2A
K07836	3	Ras-related protein Rap-1B
K07835	3	Ras-related protein Ral-B
K14610	3	solute carrier family 19 (thiamine transporter), member 2/3
K21872	3	periphilin-1
K06845	3	netrin 4
K09106	3	upstream stimulatory factor
K06093	3	partitioning defective protein 6
K05613	3	solute carrier family 1 (glial high affinity glutamate transporter), member 2
K06449	3	T-cell surface glycoprotein CD2
K06275	3	parvin
K05625	3	transglutaminase 2 [EC:2.3.2.13]
K05627	3	BAI1-associated protein 2
K23106	3	hepcidin
K06251	3	vitronectin
K23088	3	vitamin A receptor/transporter (stra6) family protein
K06232	3	growth arrest-specific 1
K22657	3	immunoglobulin superfamily DCC subclass member 4
K05692	3	actin beta/gamma 1
K06088	3	occludin
K22438	3	trans-aconitate 3-methyltransferase [EC:2.1.1.145]
K06085	3	synovial sarcoma, X breakpoint 2 interacting protein
K05724	3	FYVE, RhoGEF and PH domain containing 5/6
K05730	3	guanine nucleotide exchange factor VAV
K06070	3	protein kinase D [EC:2.7.11.13]
K22989	3	integral membrane protein GPR137
K06061	3	mastermind
K06054	3	hairy and enhancer of split 1
K05757	3	actin related protein 2/3 complex, subunit 1A/1B
K05765	3	cofilin
K05768	3	gelsolin
K05863	3	solute carrier family 25 (mitochondrial adenine nucleotide translocator), member 4/5/6/31
K23167	3	synaptic vesicle membrane protein VAT-1
K06503	3	transferrin receptor
K06843	3	netrin 1
K22030	3	leiomodin
K06842	3	semaphorin 6
K06841	3	semaphorin 5
K14640	3	solute carrier family 20 (sodium-dependent phosphate transporter)
K23408	3	cell division cycle-associated protein 7
K06831	3	galectin-3
K06830	3	galectin-1
K23405	3	doublecortin domain-containing protein 2
K05252	3	gonadotropin-releasing hormone
K23353	3	PDZ and LIM domain protein 1/2/3/4
K00031	3	isocitrate dehydrogenase [EC:1.1.1.42]
K00030	3	isocitrate dehydrogenase (NAD+) [EC:1.1.1.41]
K00029	3	malate dehydrogenase (oxaloacetate-decarboxylating)(NADP+) [EC:1.1.1.40]
K22403	3	zinc finger MIZ domain-containing protein
K06709	3	[histone H3]-trimethyl-L-lysine9/36 demethylase [EC:1.14.11.66 1.14.11.69]
K23318	3	gremlin
K22076	3	mitochondrial fission factor
K06639	3	cell division cycle 14 [EC:3.1.3.16 3.1.3.48]
K22154	3	dapper
K23293	3	regulator of microtubule dynamics protein 3
K06556	3	CD200 antigen
K05477	3	tumor necrosis factor ligand superfamily member 14
K14683	3	solute carrier family 34 (sodium-dependent phosphate cotransporter)
K23221	3	nuclear apoptosis-inducing factor 1
K06520	3	CD99 antigen
K08027	3	nuclear receptor subfamily 5 group A member 2
K23841	3	clarin
K04742	3	chondroitin 4-sulfotransferase 12 [EC:2.8.2.5]
K08800	3	NUAK family, SNF1-like kinase [EC:2.7.11.1]
K04354	3	serine/threonine-protein phosphatase 2A regulatory subunit B
K08826	3	homeodomain interacting protein kinase [EC:2.7.11.1]
K08824	3	cyclin-dependent kinase-like [EC:2.7.11.22]
K08816	3	vaccinia related kinase [EC:2.7.11.1]
K04373	3	ribosomal protein S6 kinase alpha-1/2/3/6 [EC:2.7.11.1]
K08809	3	striated muscle-specific serine/threonine protein kinase [EC:2.7.11.1]
K04379	3	proto-oncogene protein c-fos
K08805	3	doublecortin-like kinase 1/2 [EC:2.7.11.1]
K08804	3	serine/threonine kinase 17 [EC:2.7.11.1]
K04382	3	serine/threonine-protein phosphatase 2A catalytic subunit [EC:3.1.3.16]
K08803	3	death-associated protein kinase [EC:2.7.11.1]
K19947	3	F-actin monooxygenase [EC:1.14.13.225]
K04319	3	G protein-coupled receptor 22
K08794	3	calcium/calmodulin-dependent protein kinase I [EC:2.7.11.17]
K08789	3	MAST-subfamily protein kinase [EC:2.7.11.37]
K08784	3	HtrA serine peptidase 1 [EC:3.4.21.-]
K19951	3	TBC1 domain family member 8/9
K08762	3	diazepam-binding inhibitor (GABA receptor modulator, acyl-CoA-binding protein)
K08760	3	apolipoprotein A-IV
K08752	3	fatty acid-binding protein 3, muscle and heart
K24146	3	zinc finger protein basonuclin
K19989	3	tumor necrosis factor alpha-induced protein 2
K08746	3	solute carrier family 27 (fatty acid transporter), member 2 [EC:6.2.1.- 6.2.1.3]
K24135	3	MORC family CW-type zinc finger protein
K24237	3	complement C1q and tumor necrosis factor-related protein 4
K04314	3	prolactin releasing hormone receptor
K20630	3	chimaerin
K09040	3	nuclear factor erythroid 2-related factor 1/3
K09091	3	hairy and enhancer of split related with YRPW motif
K24360	3	neuropilin and tolloid-like protein
K09085	3	class B basic helix-loop-helix protein 1/6/7
K04224	3	tachykinin receptor 3
K00161	3	pyruvate dehydrogenase E1 component subunit alpha [EC:1.2.4.1]
K04235	3	coagulation factor II (thrombin) receptor-like 2
K24348	3	UBX domain-containing protein 1/4
K09057	3	hepatic leukemia factor
K24335	3	protein disulfide-isomerase [EC:5.3.4.1]
K04251	3	long/medium wavelength-sensitive opsin
K09042	3	transcription regulator BACH
K09037	3	transcription factor MAFF/G/K
K04312	3	G protein-coupled receptor 4
K04258	3	prostaglandin E receptor 1
K04261	3	prostaglandin E receptor 4
K08997	3	protein adenylyltransferase [EC:2.7.7.108]
K08958	3	casein kinase 1, gamma [EC:2.7.11.1]
K19756	3	radial spoke head protein 4/6
K19867	3	PDZ and LIM domain protein 5/6/7
K04280	3	gonadotropin-releasing hormone receptor
K08870	3	twinfilin
K08867	3	WNK lysine deficient protein kinase [EC:2.7.11.1]
K19882	3	O-palmitoleoyl-L-serine hydrolase [EC:3.1.1.98]
K04296	3	leukotriene B4 receptor 1
K04438	3	C-crk adapter molecule crk
K08738	3	cytochrome c
K04440	3	mitogen-activated protein kinase 8/9/10 (c-Jun N-terminal kinase) [EC:2.7.11.24]
K08131	3	collagen type IX alpha
K08272	3	calcium binding protein 39
K04646	3	clathrin heavy chain
K08230	3	MFS transporter, LAT3 family, solute carrier family 43, member 3
K04666	3	nodal
K08184	3	MFS transporter, MCT family, solute carrier family 16 (monocarboxylic acid transporters), member 7
K20368	3	protein cornichon
K08175	3	MFS transporter, FHS family, Na+ dependent glucose transporter 1
K04682	3	transcription factor E2F4/5
K20371	3	nucleobindin
K08148	3	MFS transporter, SP family, solute carrier family 2 (facilitated glucose transporter), member 11
K23897	3	proline-rich transmembrane protein 2
K14607	3	extracellular sulfatase Sulf [EC:3.1.6.-]
K24099	3	LIM domain transcription factor LMO4
K23880	3	reticulophagy regulator
K20465	3	oxysterol-binding protein-related protein 9/10/11
K04714	3	sphingomyelin synthase / phosphatidylethanolamine phospholipase C [EC:2.7.8.27 3.1.4.62]
K04715	3	ceramide kinase [EC:2.7.1.138]
K23879	3	progranulin
K04718	3	sphingosine kinase [EC:2.7.1.91]
K04721	3	tumor necrosis factor ligand superfamily member 10
K20478	3	golgin subfamily B member 1
K20493	3	leucine-rich repeat-containing protein 16
K23858	3	pleckstrin homology domain-containing family F
K23854	3	N-terminal EF-hand calcium-binding protein
K00078	3	dihydrodiol dehydrogenase / D-xylose 1-dehydrogenase (NADP) [EC:1.3.1.20 1.1.1.179]
K08341	3	GABA(A) receptor-associated protein
K08342	3	cysteine protease ATG4 [EC:3.4.22.-]
K20346	3	p24 family protein alpha
K08664	3	prostasin [EC:3.4.21.-]
K04455	3	heat shock protein beta-1
K20069	3	adaptin ear-binding coat-associated protein 1/2
K20072	3	switch-associated protein 70
K02730	3	20S proteasome subunit alpha 1 [EC:3.4.25.1]
K08574	3	calpain-5 [EC:3.4.22.-]
K04497	3	groucho
K04501	3	mothers against decapentaplegic homolog 4
K20128	3	metastasis suppressor protein 1
K24048	3	MAGUK p55 subfamily member 2/6
K20131	3	Rab5 GDP/GTP exchange factor
K04508	3	transducin (beta)-like 1
K04510	3	vang-like
K20161	3	DENN domain-containing protein 2
K08533	3	RAR-related orphan receptor beta
K04525	3	serpin A
K04526	3	insulin
K20173	3	RILP-like protein 1
K24024	3	rhotekin
K08428	3	G protein-coupled receptor 139
K04577	3	calcitonin receptor-like
K00088	3	IMP dehydrogenase [EC:1.1.1.205]
K20315	3	Rho GTPase-activating protein 21/23
K10704	3	ubiquitin-conjugating enzyme E2 variant
K14709	3	solute carrier family 39 (zinc transporter), member 1/2/3
K11494	3	RCC1 and BTB domain-containing protein
K00814	3	alanine transaminase [EC:2.6.1.2]
K13212	3	RNA-binding protein Luc7-like 2
K01895	3	acetyl-CoA synthetase [EC:6.2.1.1]
K17260	3	actin-related protein 2
K25684	3	beta-microseminoprotein
K17269	3	myelin basic protein
K01931	3	protein neuralized [EC:2.3.2.27]
K00784	3	ribonuclease Z [EC:3.1.26.11]
K15377	3	solute carrier family 44 (choline transporter-like protein), member 2/4/5
K26608	3	transmembrane protein 120
K17279	3	receptor expression-enhancing protein 5/6
K17291	3	MARVEL domain-containing protein 2
K25628	3	T-complex protein 11
K17300	3	galectin-3-binding protein
K15302	3	syntaxin-binding protein 4
K11428	3	[histone H4]-lysine20 N-methyltransferase SETD8 [EC:2.1.1.361]
K11518	3	mitochondrial import receptor subunit TOM40
K17198	3	Ras-related and estrogen-regulated growth inhibitor-like protein
K15559	3	regulator of Ty1 transposition protein 103
K13207	3	CUG-BP- and ETR3-like factor
K11703	3	collagen beta-1,O-galactosyltransferase [EC:2.4.1.50]
K15538	3	glycoprotein endo-alpha-1,2-mannosidase [EC:3.2.1.130]
K25732	3	secretogranin-2
K11660	3	metastasis-associated protein MTA
K11653	3	AT-rich interactive domain-containing protein 1
K01830	3	prostaglandin-H2 D-isomerase [EC:5.3.99.2]
K26497	3	transmembrane protein 230
K11650	3	SWI/SNF-related matrix-associated actin-dependent regulator of chromatin subfamily D
K00858	3	NAD+ kinase [EC:2.7.1.23]
K00850	3	6-phosphofructokinase 1 [EC:2.7.1.11]
K17065	3	dynamin 1-like protein [EC:3.6.5.5]
K11583	3	serine/threonine-protein phosphatase 2A regulatory subunit B''
K17086	3	transmembrane 9 superfamily member 2/4
K13201	3	nucleolysin TIA-1/TIAR
K00816	3	kynurenine---oxoglutarate transaminase / cysteine-S-conjugate beta-lyase / glutamine---phenylpyruvate transaminase [EC:2.6.1.7 4.4.1.13 2.6.1.64]
K13349	3	Mpv17-like protein
K15295	3	complexin-3/4
K11422	3	[histone H3]-lysine4 N-trimethyltransferase SETD1 [EC:2.1.1.354]
K17305	3	beta-2-glycoprotein 1
K00671	3	glycylpeptide N-tetradecanoyltransferase [EC:2.3.1.97]
K02165	3	dickkopf 1/2/4
K13576	3	solute carrier family 38 (sodium-coupled neutral amino acid transporter), member 3
K25537	3	fibroleukin
K02207	3	ubiquitin-conjugating enzyme E2 R [EC:2.3.2.23]
K13667	3	EGF-domain serine glucosyl/xylosyltransferase [EC:2.4.1.376 2.4.2.63]
K13676	3	UDP-D-xylose:beta-D-glucoside alpha-1,3-D-xylosyltransferase [EC:2.4.2.42]
K00643	3	5-aminolevulinate synthase [EC:2.3.1.37]
K11254	3	histone H4
K25509	3	beta/gamma crystallin domain-containing protein
K25493	3	dickkopf 3
K00624	3	carnitine O-acetyltransferase [EC:2.3.1.7]
K15188	3	cyclin T
K11155	3	diacylglycerol O-acyltransferase 1 [EC:2.3.1.20 2.3.1.75 2.3.1.76]
K11151	3	retinol dehydrogenase 10 [EC:1.1.1.-]
K11321	3	bromodomain-containing protein 8
K26811	3	XK-related protein 4/6/7
K00678	3	phosphatidylcholine-retinol O-acyltransferase [EC:2.3.1.135]
K17338	3	receptor expression-enhancing protein 1/2/3/4
K00741	3	N-acetyllactosaminide beta-1,3-N-acetylglucosaminyltransferase [EC:2.4.1.149]
K15293	3	protein unc-13 A/B/C
K02131	3	F-type H+-transporting ATPase subunit 6
K17333	3	nuclear factor of activated T-cells, cytoplasmic 3
K15287	3	solute carrier family 35, member F1/2
K25557	3	HHIP-like protein
K26683	3	vesicle transport protein GOT1
K15261	3	poly [ADP-ribose] polymerase 10/14/15 [EC:2.4.2.30]
K17342	3	fibulin 7
K17343	3	peripherin-2
K15281	3	solute carrier family 35, member D1/2/3
K02148	3	V-type H+-transporting ATPase subunit C
K26752	3	golgi apparatus membrane protein TVP23
K17356	3	tetraspanin-13/31
K11716	3	cyclin-dependent kinase 5 activator 1
K15595	3	cyclin-dependent kinase 17 [EC:2.7.11.22]
K02265	3	cytochrome c oxidase subunit 5b
K12614	3	ATP-dependent RNA helicase DDX6/DHH1 [EC:5.6.2.7]
K12382	3	saposin
K12375	3	arylsulfatase I/J [EC:3.1.6.-]
K12357	3	sialidase-2/3/4 [EC:3.2.1.18]
K12757	3	myosin regulatory light chain 12
K26090	3	SIN3-HDAC complex-associated factor
K01125	3	N-acetylglucosamine-1-phosphodiester alpha-N-acetylglucosaminidase [EC:3.1.4.45]
K01124	3	glycerophosphoinositol inositolphosphodiesterase [EC:3.1.4.43]
K12302	3	MFS transporter, ACS family, solute carrier family 17 (sodium-dependent inorganic phosphate cotransporter), member 6/7/8
K26050	3	myozenin
K01109	3	inositol polyphosphate-4-phosphatase [EC:3.1.3.66]
K12197	3	charged multivesicular body protein 1
K01446	3	peptidoglycan recognition protein
K12186	3	ESCRT-I complex subunit MVB12
K12183	3	ESCRT-I complex subunit TSG101
K16665	3	leucine-rich repeat transmembrane neuronal protein 1/2
K01363	3	cathepsin B [EC:3.4.22.1]
K12387	3	lysosomal-associated transmembrane protein
K25747	3	zymogen granule membrane protein 16
K12393	3	AP-1 complex subunit mu
K12493	3	ADP-ribosylation factor GTPase-activating protein 2/3
K12494	3	PH and SEC7 domain-containing protein
K26158	3	stathmin 2/3/4
K01265	3	methionyl aminopeptidase [EC:3.4.11.18]
K12485	3	Rab11 family-interacting protein 3/4
K12472	3	epidermal growth factor receptor substrate 15
K01304	3	pyroglutamyl-peptidase [EC:3.4.19.3]
K12471	3	epsin
K16479	3	outer dense fiber protein 2
K12561	3	myristoylated alanine-rich C-kinase substrate
K16497	3	protocadherin gamma subfamily C
K12580	3	CCR4-NOT transcription complex subunit 3
K01320	3	coagulation factor VII [EC:3.4.21.21]
K16452	3	coiled-coil domain-containing protein 92
K01206	3	alpha-L-fucosidase [EC:3.2.1.51]
K01490	3	AMP deaminase [EC:3.5.4.6]
K12150	3	adenosine 5'-monophosphoramidase HINT3 [EC:3.9.1.-]
K15789	3	threonine 3-dehydrogenase [EC:1.1.1.103]
K01495	3	GTP cyclohydrolase IA [EC:3.5.4.16]
K15687	3	E3 ubiquitin-protein ligase makorin [EC:2.3.2.27]
K13051	3	L-asparaginase / beta-aspartyl-peptidase [EC:3.5.1.1 3.4.19.5]
K13072	3	C-C motif chemokine 25
K13084	3	phosphatidylinositol-4,5-bisphosphate 4-phosphatase [EC:3.1.3.78]
K27587	3	microtubule-associated protein Jupiter
K25782	3	immunoglobulin-like domain-containing receptor 2
K01689	3	enolase 1/2/3 [EC:4.2.1.11]
K15623	3	protein SSXT
K11842	3	ubiquitin carboxyl-terminal hydrolase 12/46 [EC:3.4.19.12]
K25777	3	golgin subfamily A member 7
K00923	3	phosphatidylinositol-4-phosphate 3-kinase [EC:2.7.1.154]
K26434	3	leucine-rich repeat flightless-interacting protein
K27588	3	inactive rhomboid protein
K16827	3	signal-regulatory protein delta
K16860	3	phospholipase D3/4 [EC:3.1.4.4]
K15688	3	E3 ubiquitin-protein ligase MUL1 [EC:2.3.2.27]
K00006	3	glycerol-3-phosphate dehydrogenase (NAD+) [EC:1.1.1.8]
K11982	3	E3 ubiquitin-protein ligase RNF115/126 [EC:2.3.2.27]
K26384	3	serine palmitoyltransferase small subunit
K15728	3	phosphatidate phosphatase LPIN [EC:3.1.3.4]
K15719	3	protein O-GlcNAcase / histone acetyltransferase [EC:3.2.1.169 2.3.1.48]
K25856	3	AT-rich interactive domain-containing protein 3
K25839	3	NEDD4 family-interacting protein
K01511	3	ectonucleoside triphosphate diphosphohydrolase 5/6 [EC:3.6.1.6]
K01512	3	acylphosphatase [EC:3.6.1.7]
K16682	3	LIM domain-containing protein
K12958	3	caveolin 2
K12891	3	serine/arginine-rich splicing factor 2/8
K01539	3	sodium/potassium-transporting ATPase subunit alpha [EC:7.2.2.13]
K01015	3	alcohol sulfotransferase [EC:2.8.2.2]
K11995	3	deoxyribonuclease-1-like protein [EC:3.1.21.-]
K01013	3	thiosulfate:glutathione sulfurtransferase [EC:2.8.1.-]
K01011	3	thiosulfate/3-mercaptopyruvate sulfurtransferase [EC:2.8.1.1 2.8.1.2]
K15187	3	YEATS domain-containing protein 1/3
K01273	3	membrane dipeptidase [EC:3.4.13.19]
K13761	3	high affinity cGMP-specific 3',5'-cyclic phosphodiesterase 9 [EC:3.1.4.35]
K25453	3	cocaine- and amphetamine-regulated transcript protein
K00355	3	NAD(P)H dehydrogenase (quinone) [EC:1.6.5.2]
K02295	3	cryptochrome
K13748	3	alpha-1,3-mannosylglycoprotein beta-1,4-N-acetylglucosaminyltransferase C [EC:2.4.1.201 2.4.1.145]
K15103	3	solute carrier family 25 (mitochondrial uncoupling protein), member 8/9
K27310	3	transmembrane protein 41
K17603	3	zinc finger FYVE domain-containing protein 1
K15043	3	importin subunit alpha-1/8
K02366	3	glucuronyl/N-acetylglucosaminyl transferase EXT1 [EC:2.4.1.224 2.4.1.225]
K17494	3	cysteine/serine-rich nuclear protein
K15123	3	solute carrier family 25, member 45/47
K17586	3	PHD and RING finger domain-containing protein 1
K25448	3	olfactomedin-like protein 1/3
K02375	3	frizzled 5/8
K13864	3	solute carrier family 7 (cationic amino acid transporter), member 2
K17616	3	CTD small phosphatase-like protein 2 [EC:3.1.3.-]
K14009	3	B-cell receptor-associated protein 31
K15109	3	solute carrier family 25 (mitochondrial carnitine/acylcarnitine transporter), member 20/29
K13764	3	recoverin
K13957	3	kelch-like protein 33
K00505	3	tyrosinase [EC:1.14.18.1]
K02353	3	segment polarity protein dishevelled
K10949	3	ER lumen protein retaining receptor
K15116	3	solute carrier family 25, member 33/36
K00326	3	cytochrome-b5 reductase [EC:1.6.2.2]
K27491	3	endosulfine family protein
K25440	3	CFAP73 family protein
K25405	3	regulator of G-protein signaling 9-binding protein
K02267	3	cytochrome c oxidase subunit 6b
K00318	3	proline dehydrogenase [EC:1.5.5.2]
K15008	3	discs, large-associated protein 1
K15164	3	mediator of RNA polymerase II transcription subunit 13
K02432	3	frizzled 1/7
K02583	3	tumor necrosis factor receptor superfamily member 16
K00286	3	pyrroline-5-carboxylate reductase [EC:1.5.1.2]
K13887	3	coronin-2
K14027	3	homocysteine-responsive endoplasmic reticulum-resident ubiquitin-like domain member 1 protein
K22653	2	neuroplastin
K06101	2	[histone H3]-lysine4 N-trimethyltransferase ASH1L [EC:2.1.1.354]
K08103	2	heparan sulfate 6-O-sulfotransferase HS6ST3 [EC:2.8.2.-]
K15701	2	E3 ubiquitin-protein ligase RNF130 [EC:2.3.2.27]
K06103	2	calcium/calmodulin-dependent serine protein kinase [EC:2.7.11.1]
K08074	2	ADP-dependent glucokinase [EC:2.7.1.147]
K08029	2	homeobox protein Nkx-2.2
K14020	2	wolfamin
K15105	2	solute carrier family 25 (mitochondrial aspartate/glutamate transporter), member 12/13
K08022	2	arachidonate 15-lipoxygenase (second type) / 8-lipoxygenase (S-type) [EC:1.13.11.33 1.13.11.-]
K14685	2	solute carrier family 40 (iron-regulated transporter), member 1
K20644	2	Rho GTPase-activating protein 29
K22687	2	inhibin beta B chain
K20647	2	Rho GTPase-activating protein 32
K12859	2	U5 snRNP protein, DIM1 family
K13022	2	carboxypeptidase Z [EC:3.4.17.-]
K15690	2	RING finger and CCCH-type zinc finger domain-containing protein
K06124	2	phosphoethanolamine/phosphocholine phosphatase [EC:3.1.3.75]
K12881	2	THO complex subunit 4
K08003	2	matrix metalloproteinase-25 (membrane-inserted) [EC:3.4.24.-]
K20641	2	Rho GTPase-activating protein 20
K08102	2	heparan sulfate 6-O-sulfotransferase HS6ST2 [EC:2.8.2.-]
K22697	2	phosphatidylethanolamine phospholipase C [EC:3.1.4.62]
K20639	2	Rho GTPase-activating protein 18/28/40
K12886	2	heterogeneous nuclear ribonucleoprotein K
K08057	2	calreticulin
K15707	2	E3 ubiquitin-protein ligase RNF170 [EC:2.3.2.27]
K08001	2	matrix metalloproteinase-23 (CA-MMP) [EC:3.4.24.-]
K12875	2	apoptotic chromatin condensation inducer in the nucleus
K20472	2	coatomer subunit zeta
K12890	2	serine/arginine-rich splicing factor 1
K22674	2	growth differentiation factor 10
K22670	2	bone morphogenetic protein 10
K12892	2	serine/arginine-rich splicing factor 3
K12894	2	heterogeneous nuclear ribonucleoprotein A0
K12896	2	serine/arginine-rich splicing factor 7
K20631	2	Rho GTPase-activating protein 6
K15699	2	RING finger protein 122
K08048	2	adenylate cyclase 8 [EC:4.6.1.1]
K08058	2	TAP binding protein (tapasin)
K15698	2	RING finger protein 121/175
K20635	2	Rho GTPase-activating protein 11
K12947	2	signal peptidase complex subunit 2 [EC:3.4.-.-]
K20640	2	Rho GTPase-activating protein 19
K06625	2	cyclin-dependent kinase inhibitor 1A
K07998	2	matrix metalloproteinase-19 (RASI) [EC:3.4.24.-]
K07997	2	matrix metalloproteinase-17 (membrane-inserted) [EC:3.4.24.-]
K07923	2	Ras-related protein Rab-38
K20792	2	N-alpha-acetyltransferase 15/16, NatA auxiliary subunit
K07920	2	Ras-related protein Rab-33B
K20797	2	PR domain zinc finger protein 8 [EC:2.1.1.-]
K07913	2	Ras-related protein Rab-26
K13108	2	smad nuclear-interacting protein 1
K22583	2	metalloproteinase inhibitor 2
K20804	2	E3 ubiquitin-protein ligase RNF34 [EC:2.3.2.31]
K07910	2	Ras-related protein Rab-18
K07908	2	Ras-related protein Rab-15
K20813	2	thymine-DNA glycosylase [EC:3.2.2.29]
K07906	2	Ras-related protein Rab-25
K13110	2	microfibrillar-associated protein 1
K13111	2	WD40 repeat-containing protein SMU1
K07902	2	Ras-related protein Rab-8B
K07901	2	Ras-related protein Rab-8A
K07899	2	Ras-related protein Rab-9A
K07897	2	Ras-related protein Rab-7A
K07894	2	Ras-related protein Rab-6B
K07893	2	Ras-related protein Rab-6A
K07891	2	Ras-related protein Rab-22
K15617	2	LIM domain-binding protein 1
K07887	2	Ras-related protein Rab-5A
K07886	2	Ras-related protein Rab-27B
K07884	2	Ras-related protein Rab-3D
K07882	2	Ras-related protein Rab-3A
K07876	2	Ras-related protein Rab-35
K22591	2	activity-dependent neuroprotector homeobox protein
K15620	2	golgi phosphoprotein 3
K15622	2	myeloid leukemia factor 1
K06176	2	tRNA pseudouridine13 synthase [EC:5.4.99.27]
K07995	2	matrix metalloproteinase-15 (membrane-inserted) [EC:3.4.24.-]
K13024	2	inositol-hexakisphosphate/diphosphoinositol-pentakisphosphate 1-kinase [EC:2.7.4.24]
K13044	2	heterogeneous nuclear ribonucleoprotein A/B/D
K07993	2	matrix metalloproteinase-11 (stromelysin 3) [EC:3.4.24.-]
K20690	2	Rho guanine nucleotide exchange factor 25
K14951	2	cation-transporting P-type ATPase 13A3/4/5 [EC:7.2.2.-]
K07983	2	high affinity immunoglobulin epsilon receptor subunit gamma
K22647	2	ubiquitin carboxyl-terminal hydrolase MINDY-3/4 [EC:3.4.19.12]
K22644	2	voltage-gated hydrogen channel 1
K15106	2	solute carrier family 25 (mitochondrial carrier), member 14/30
K06173	2	tRNA pseudouridine38-40 synthase [EC:5.4.99.12]
K07968	2	beta-1,4-galactosyltransferase 3 [EC:2.4.1.90 2.4.1.38 2.4.1.-]
K20726	2	transmembrane protein 222
K15113	2	solute carrier family 25 (mitochondrial iron transporter), member 28/37
K22609	2	osteocalcin
K15682	2	ligand of Numb protein X 3/4 [EC:2.3.2.27]
K13090	2	interleukin enhancer-binding factor 3
K13093	2	HIV Tat-specific factor 1
K07950	2	ADP-ribosylation factor-like protein 5B
K06210	2	nicotinamide mononucleotide adenylyltransferase [EC:2.7.7.1 2.7.7.18]
K15630	2	GDP-D-glucose phosphorylase [EC:2.7.7.78]
K22608	2	parathyroid hormone-related hormone
K07941	2	ADP-ribosylation factor 6
K07937	2	ADP-ribosylation factor 1/2
K20778	2	RAD51-associated protein 1
K22594	2	pogo transposable element with ZNF domain
K15100	2	solute carrier family 25 (mitochondrial citrate transporter), member 1
K12836	2	splicing factor U2AF 35 kDa subunit
K22735	2	sodium/potassium-transporting ATPase subunit beta-1-interacting protein
K14945	2	protein quaking
K20296	2	vacuolar protein sorting-associated protein 51
K20301	2	trafficking protein particle complex subunit 2
K16454	2	centriole, cilia and spindle-associated protein
K08416	2	psychosine receptor
K16453	2	centrosomal protein CEP110
K08411	2	G protein-coupled receptor 26
K12603	2	CCR4-NOT transcription complex subunit 6 [EC:3.1.13.4]
K15015	2	solute carrier family 32 (vesicular inhibitory amino acid transporter)
K22763	2	deubiquitinase DESI2 [EC:3.4.19.12]
K14281	2	transforming acidic coiled-coil-containing protein 1
K08388	2	P2Y purinoceptor 13
K12605	2	CCR4-NOT transcription complex subunit 2
K12606	2	CCR4-NOT transcription complex subunit 9
K16367	2	endothelin-2
K16355	2	leucine-rich repeat and fibronectin type-III domain-containing protein 2
K20316	2	short coiled-coil protein
K08375	2	neuropeptide FF receptor 2
K08374	2	KISS1 receptor
K22762	2	desumoylating isopeptidase 1 [EC:3.4.-.-]
K08371	2	transmembrane reductase [EC:7.2.1.3]
K22760	2	CXXC-type zinc finger protein 5
K14778	2	ATP-dependent RNA helicase DDX49/DBP8 [EC:5.6.2.7]
K06051	2	delta
K06053	2	recombining binding protein suppressor of hairless
K12615	2	enhancer of mRNA-decapping protein 3
K16364	2	gliomedin
K16360	2	netrin-G3 ligand
K14242	2	NF-kappa-B inhibitor zeta
K12581	2	CCR4-NOT transcription complex subunit 7/8
K08430	2	G protein-coupled receptor 142
K08435	2	G protein-coupled receptor 151
K20284	2	Rab GTPase-activating protein 1
K14963	2	COMPASS component SWD3
K08531	2	nuclear receptor subfamily 1 group D member 2
K14300	2	nuclear pore complex protein Nup133
K20174	2	oxysterol-binding protein-related protein 1/2
K20177	2	vacuolar protein sorting-associated protein 3
K08519	2	syntaxin-binding protein 6
K08517	2	vesicle transport protein SEC22
K14297	2	nuclear pore complex protein Nup98-Nup96
K08512	2	vesicle-associated membrane protein 8
K22830	2	essential MCU regulator, mitochondrial
K08504	2	blocked early in transport 1
K08497	2	protein transport protein SEC20
K12496	2	early growth response protein 2
K22829	2	calcium uniporter regulatory subunit MCUb, mitochondrial
K08493	2	vesicle transport through interaction with t-SNAREs 1
K05870	2	cyclic AMP-responsive element-binding protein 1
K20195	2	vacuolar fusion protein MON1
K05906	2	prenylcysteine oxidase / farnesylcysteine lyase [EC:1.8.3.5 1.8.3.6]
K20197	2	kinesin family member 3C
K20211	2	prospero homeobox 1
K22810	2	protein FAM84B
K20216	2	dual specificity phosphatase 10 [EC:3.1.3.16 3.1.3.48]
K22804	2	structural maintenance of chromosomes protein 6
K08456	2	adhesion G-protein coupled receptor F3
K20280	2	trafficking protein particle complex subunit 5
K08447	2	receptor activity modifying protein 1
K08446	2	CD97 antigen
K16358	2	leucine-rich repeat and fibronectin type-III domain-containing protein 5
K20350	2	p24 family protein gamma-4
K12842	2	U2-associated protein SR140
K15985	2	cAMP-dependent protein kinase inhibitor alpha
K22747	2	apoptosis-inducing factor 3
K08179	2	MFS transporter, MCT family, solute carrier family 16 (monocarboxylic acid transporters), member 1
K15042	2	importin subunit alpha-6/7
K12822	2	RNA-binding protein 25
K12823	2	ATP-dependent RNA helicase DDX5/DBP2 [EC:5.6.2.7]
K08171	2	MFS transporter, OPA family, solute carrier family 37 (glycerol-6-phosphate transporter), member 4
K16142	2	haptoglobin
K16072	2	ELKS/RAB6-interacting/CAST family member 1
K16056	2	calcium release-activated calcium channel protein 1
K20372	2	TBC1 domain family member 20
K06067	2	histone deacetylase 1/2 [EC:3.5.1.98]
K20393	2	PRA1 family protein 3
K08136	2	testican
K20404	2	SEA/GATOR complex protein SEA1/DEPDC5
K16352	2	sialic acid binding Ig-like lectin 15
K14341	2	solute carrier family 10 (sodium/bile acid cotransporter), member 1
K08126	2	osteoglycin
K08121	2	fibromodulin
K15044	2	Arf-GAP domain and FG repeats-containing protein 1
K14206	2	solute carrier family 15 (oligopeptide transporter), member 1
K20411	2	proline-rich protein 5
K08115	2	chondroitin sulfate proteoglycan 4
K20456	2	oxysterol-binding protein 1
K13115	2	coiled-coil domain-containing protein 130
K08111	2	glypican 5
K20462	2	oxysterol-binding protein 2
K06071	2	serine/threonine-protein kinase N1 [EC:2.7.11.13]
K12838	2	poly(U)-binding-splicing factor PUF60
K16186	2	Ras-related GTP-binding protein C/D
K22750	2	glycine N-acyltransferase-like protein 3 [EC:2.3.1.-]
K08182	2	MFS transporter, MCT family, solute carrier family 16 (monocarboxylic acid transporters), member 5
K08183	2	MFS transporter, MCT family, solute carrier family 16 (monocarboxylic acid transporters), member 6
K08333	2	phosphoinositide-3-kinase, regulatory subunit 4 [EC:2.7.11.1]
K12641	2	lamin A/C
K08327	2	phosducin
K16340	2	PH domain and leucine-rich repeat-containing protein phosphatase [EC:3.1.3.16]
K12656	2	suppressor of IKK-epsilon
K12657	2	delta-1-pyrroline-5-carboxylate synthetase [EC:2.7.2.11 1.2.1.41]
K08285	2	midline 1 [EC:2.3.2.27]
K08283	2	collagen type IV alpha-3-binding protein
K16295	2	lysosomal membrane ascorbate-dependent ferrireductase [EC:7.2.1.3]
K16198	2	14-3-3 protein gamma/eta
K08270	2	DNA-damage-inducible transcript 4
K14694	2	solute carrier family 30 (zinc transporter), member 11
K08229	2	MFS transporter, LAT3 family, solute carrier family 43, member 2
K06057	2	numb
K14715	2	solute carrier family 39 (zinc transporter), member 9
K08228	2	MFS transporter, LAT3 family, solute carrier family 43, member 1
K08220	2	MFS transporter, FLVCR family, feline leukemia virus subgroup C receptor-related protein
K08215	2	MFS transporter, OCT family, solute carrier family 22 (organic anion transporter), member 23
K20362	2	protein transport protein YIF1
K08213	2	MFS transporter, OCT family, solute carrier family 22 (organic cation transporter), member 17
K20363	2	protein YIPF5/7
K15040	2	voltage-dependent anion channel protein 2
K12778	2	meiosis-specific protein
K16195	2	eukaryotic translation initiation factor 2-alpha kinase 2 [EC:2.7.11.1]
K12799	2	apoptosis-associated speck-like protein containing a CARD
K20366	2	endoplasmic reticulum-Golgi intermediate compartment protein 2
K12804	2	proline-serine-threonine phosphatase interacting protein 1
K15117	2	solute carrier family 25, member 34/35
K15593	2	ets translocation variant 5
K15603	2	transcription factor 4/12
K13376	2	transforming growth factor beta-2
K21878	2	Usher syndrome type-1G protein
K21893	2	neuroglobin
K13403	2	methylenetetrahydrofolate dehydrogenase(NAD+) / 5,10-methenyltetrahydrofolate cyclohydrolase [EC:1.5.1.15 3.5.4.9]
K13781	2	solute carrier family 7 (L-type amino acid transporter), member 8
K13444	2	formylglycine-generating enzyme [EC:1.8.3.7]
K06855	2	mitogen-activated protein kinase 4/6 [EC:2.7.11.24]
K21894	2	cytoglobin
K21913	2	kelch repeat and BTB domain-containing protein 13
K06852	2	hyaluronan and proteoglycan link protein 3
K06529	2	semaphorin 7
K06848	2	hyaluronan and proteoglycan link protein 1
K21916	2	BTB/POZ domain-containing protein KCTD6
K13499	2	chondroitin sulfate synthase [EC:2.4.1.175 2.4.1.226]
K06537	2	CD151 antigen
K13510	2	lysophosphatidylcholine acyltransferase / lyso-PAF acetyltransferase [EC:2.3.1.23 2.3.1.67]
K14947	2	epithelial splicing regulatory protein 1/2
K13517	2	lysophospholipid acyltransferase 1/2 [EC:2.3.1.51 2.3.1.-]
K21917	2	BTB/POZ domain-containing protein KCTD7/14
K06540	2	disintegrin and metalloproteinase domain-containing protein 8 [EC:3.4.24.-]
K13523	2	lysophosphatidic acid acyltransferase / lysophosphatidylinositol acyltransferase [EC:2.3.1.51 2.3.1.-]
K21919	2	BTB/POZ domain-containing protein KCTD9
K13780	2	solute carrier family 7 (L-type amino acid transporter), member 5
K06832	2	galectin-8
K14676	2	lysophospholipid hydrolase [EC:3.1.1.5]
K14648	2	poly(U)-specific endoribonuclease [EC:3.1.-.-]
K15258	2	poly [ADP-ribose] polymerase 6/8 [EC:2.4.2.30]
K06828	2	midkine
K06528	2	lysosomal-associated membrane protein 1/2
K13782	2	solute carrier family 7 (D/L-type amino acid transporter), member 10
K13754	2	solute carrier family 24 (sodium/potassium/calcium exchanger), member 6
K21873	2	protein TASOR
K21772	2	transcriptional activator protein Pur-alpha
K15294	2	complexin-1/2
K07190	2	phosphorylase kinase alpha/beta subunit
K14634	2	fructose-2,6-bisphosphatase [EC:3.1.3.46]
K07188	2	hormone-sensitive lipase [EC:3.1.1.79]
K13354	2	solute carrier family 25 (peroxisomal adenine nucleotide transporter), member 17
K21776	2	protein lin-54
K14636	2	MFS transporter, DHA1 family, solute carrier family 18 (vesicular acetylcholine transporter), member 3
K06514	2	Thy-1 cell surface antigen
K15292	2	syntaxin-binding protein 1
K13358	2	sodium/hydrogen exchange regulatory cofactor NHE-RF2
K13806	2	sn1-specific diacylglycerol lipase [EC:3.1.1.116]
K07127	2	5-hydroxyisourate hydrolase [EC:3.5.2.17]
K21799	2	transcriptional activator protein Pur-beta
K21805	2	protein N-lysine methyltransferase METTL21C [EC:2.1.1.-]
K21843	2	tetratricopeptide repeat protein 7
K13784	2	prothymosin alpha
K13363	2	FXYD domain-containing ion transport regulator 6
K21852	2	dedicator of cytokinesis protein 6/7/8
K06975	2	uncharacterized protein
K15288	2	solute carrier family 35, member F3/4
K21853	2	dedicator of cytokinesis protein 9/10/11
K21863	2	sodium leak channel non-selective protein
K13783	2	MFS transporter, OPA family, solute carrier family 37 (glycerol-3-phosphate transporter), member 1/2
K22388	2	NGFI-A-binding protein
K21870	2	barrier-to-autointegration factor
K22387	2	lysophospholipase D [EC:3.1.4.39]
K06823	2	collagen type XVIII alpha
K21950	2	homeobox protein Hox-A9
K13813	2	syntaxin 12/13
K06715	2	prostaglandin D2 receptor 2
K13699	2	abhydrolase domain-containing protein 5 [EC:2.3.1.51]
K06707	2	B- and T-lymphocyte attenuator
K06706	2	CD248 antigen, endosialin
K22288	2	angiopoietin-like 3
K15186	2	ELL-associated factor
K22068	2	iron-sulfur cluster assembly enzyme ISCU, mitochondrial
K22069	2	LYR motif-containing protein 4
K13700	2	abhydrolase domain-containing protein 6 [EC:3.1.1.23]
K06691	2	26S proteasome regulatory subunit N13
K13701	2	abhydrolase domain-containing protein 8
K06593	2	poliovirus receptor-related 4
K15208	2	snRNA-activating protein complex subunit 1
K22137	2	mitochondrial calcium uniporter regulator 1
K13705	2	abhydrolase domain-containing protein 12B [EC:3.-.-.-]
K13706	2	abhydrolase domain-containing protein 14
K06670	2	cohesin complex subunit SCC1
K22139	2	mitochondrial pyruvate carrier 2
K15199	2	general transcription factor 3C polypeptide 1
K13711	2	phosphatidylinositol 4-kinase type 2 [EC:2.7.1.67]
K06613	2	alpha-N-acetyl-neuraminate alpha-2,8-sialyltransferase (sialyltransferase 8C) [EC:2.4.3.-]
K22255	2	ATPase inhibitor, mitochondrial
K22182	2	thioredoxin reductase (NADPH) [EC:1.8.1.9]
K06632	2	wee1-like protein kinase [EC:2.7.11.1]
K06630	2	14-3-3 protein epsilon
K22237	2	Rab effector MyRIP
K06629	2	protein DBF4
K06624	2	cyclin-dependent kinase inhibitor 1B
K06711	2	hypoxia-inducible factor prolyl 4-hydroxylase [EC:1.14.11.-]
K06724	2	neuropilin 1
K21951	2	homeobox protein Hox-A11
K13697	2	abhydrolase domain-containing protein 2
K21952	2	CASK-interacting protein
K06816	2	golgi apparatus protein 1
K21954	2	FYVE and coiled-coil domain-containing protein 1
K13536	2	MARCKS-related protein
K06805	2	cadherin 18, type 2
K21958	2	extracellular serine/threonine protein kinase FAM20C [EC:2.7.11.1]
K06798	2	cadherin 6, type 2, K-cadherin
K06791	2	immunoglobulin superfamily, member 11
K06790	2	cell surface A33 antigen
K06789	2	adipocyte-specific adhesion molecule
K06788	2	coxsackievirus and adenovirus receptor
K06786	2	junctional adhesion molecule 4
K06785	2	junctional adhesion molecule 3
K13749	2	solute carrier family 24 (sodium/potassium/calcium exchanger), member 1
K21989	2	calcium permeable stress-gated cation channel
K21991	2	protein unc-45
K13578	2	bone morphogenetic protein receptor type-1B [EC:2.7.11.30]
K22000	2	relaxin 3
K13619	2	phospholipase DDHD1 [EC:3.1.1.118]
K22001	2	insulin-like 5
K14752	2	docking protein 1
K06756	2	neuronal cell adhesion molecule
K06753	2	roundabout, axon guidance receptor 1
K13675	2	UDP-glucose:O-linked fucose beta-1,3-glucosyltransferase [EC:2.4.1.-]
K22291	2	StAR-related lipid transfer protein 3
K06735	2	junctional adhesion molecule 2
K06732	2	CUB domain-containing protein 1
K13807	2	serine/threonine-protein phosphatase with EF-hands [EC:3.1.3.16]
K21770	2	G2/mitotic-specific cyclin-B2
K15118	2	solute carrier family 25, member 38
K06268	2	serine/threonine-protein phosphatase 2B regulatory subunit
K15445	2	tRNA (guanine9-N1)-methyltransferase [EC:2.1.1.221]
K07755	2	arsenite methyltransferase [EC:2.1.1.137]
K21099	2	MARVEL domain-containing protein 3
K07631	2	gap junction alpha-10 protein
K07630	2	gap junction delta-4 protein
K06270	2	protein phosphatase 1 regulatory subunit 12A
K07622	2	gap junction beta-3 protein
K13167	2	SR-related and CTD-associated factor 4
K15437	2	aminoacyl tRNA synthase complex-interacting multifunctional protein 1
K15434	2	protein FAM98B
K07618	2	gap junction alpha-9 protein
K13178	2	ATP-dependent RNA helicase DDX17 [EC:5.6.2.7]
K06272	2	integrin-linked kinase [EC:2.7.11.1]
K07608	2	internexin neuronal intermediate filament protein, alpha
K06274	2	vasodilator-stimulated phosphoprotein
K21248	2	vacuole membrane protein 1
K13959	2	kelch-like protein 38
K13182	2	ATP-dependent RNA helicase DDX39 [EC:5.6.2.7]
K13190	2	RNA-binding protein 15
K14620	2	riboflavin transporter 2
K15425	2	serine/threonine-protein phosphatase 4 regulatory subunit 2
K21269	2	endophilin-B2
K13196	2	zinc finger protein ubi-d4
K21290	2	phosphoinositide-3-kinase regulatory subunit 5/6
K13198	2	KH domain-containing, RNA-binding, signal transduction-associated protein 1
K13199	2	plasminogen activator inhibitor 1 RNA-binding protein
K21407	2	adipocyte plasma membrane-associated protein
K21068	2	MICAL-like protein 2
K07767	2	katanin p60 ATPase-containing subunit A1 [EC:5.6.1.1]
K13203	2	zinc finger RNA-binding protein
K13989	2	Derlin-2/3
K20839	2	ribosomal protein S6 kinase-like
K07866	2	Ras homolog gene family, member V
K07865	2	Ras homolog gene family, member U
K07863	2	Ras homolog gene family, member G
K06240	2	laminin, alpha 3/5
K07860	2	Ras-related C3 botulinum toxin substrate 2
K07859	2	Rho family GTPase 3
K07858	2	Rho family GTPase 2
K07855	2	Ras-related and estrogen-regulated growth inhibitor
K06626	2	G1/S-specific cyclin-E1
K06243	2	laminin, beta 2
K22565	2	COMM domain containing 9
K15119	2	solute carrier family 25, member 39/40
K07840	2	DIRAS family, GTP-binding Ras-like 1
K15516	2	fragile X mental retardation protein
K15121	2	solute carrier family 25, member 44
K15504	2	serine/threonine-protein phosphatase 6 regulatory ankyrin repeat subunit C
K06260	2	platelet glycoprotein V
K15498	2	serine/threonine-protein phosphatase 6 catalytic subunit [EC:3.1.3.16]
K07827	2	GTPase KRas
K15494	2	protein phosphatase 1 regulatory subunit 1B
K15465	2	BCL2/adenovirus E1B 19 kDa protein-interacting protein 3-like
K07819	2	beta-1,3-galactosyltransferase 1 [EC:2.4.1.86]
K13162	2	poly(rC)-binding protein 2
K07817	2	receptor-type tyrosine-protein phosphatase N [EC:3.1.3.48]
K13164	2	male-specific lethal 2
K21032	2	beta-1,4-glucuronyltransferase 1 [EC:2.4.1.-]
K07531	2	Rho family GTPase 1
K07523	2	netrin-G1 ligand
K07198	2	5'-AMP-activated protein kinase, catalytic alpha subunit [EC:2.7.11.31]
K07390	2	monothiol glutaredoxin
K13302	2	serum/glucocorticoid-regulated kinase 1 [EC:2.7.11.1]
K14621	2	phospholipase B1, membrane-associated [EC:3.1.1.4 3.1.1.5]
K14622	2	retinol binding protein 2
K15309	2	CREB-regulated transcription coactivator 1
K07371	2	B-cell linker protein
K07369	2	mucosa-associated lymphoid tissue lymphoma translocation protein 1 [EC:3.4.22.-]
K13858	2	solute carrier family 4 (sodium bicarbonate cotransporter), member 7
K06485	2	integrin alpha 6
K21596	2	calmodulin-binding transcription activator
K15306	2	Ran-binding protein 1
K07366	2	GRB2-related adaptor protein 2
K07361	2	lymphocyte cytosolic protein 2
K13342	2	peroxin-5
K07304	2	peptide-methionine (S)-S-oxide reductase [EC:1.8.4.11]
K14625	2	C-C motif chemokine 20
K07300	2	Ca2+:H+ antiporter
K21644	2	HMG box transcription factor 1
K06493	2	integrin beta 3
K13348	2	protein Mpv17
K21668	2	cell surface glycoprotein CD200 receptor
K07277	2	outer membrane protein insertion porin family
K14948	2	polypyrimidine tract-binding protein 2
K07249	2	retinal dehydrogenase [EC:1.2.1.36]
K07232	2	glutathione-specific gamma-glutamylcyclotransferase [EC:4.3.2.7]
K07208	2	Ras homolog enriched in brain
K07206	2	tuberous sclerosis 1
K15296	2	alpha-soluble NSF attachment protein
K13289	2	cathepsin A (carboxypeptidase C) [EC:3.4.16.5]
K21456	2	glutathione synthase [EC:6.3.2.3]
K06277	2	Rap guanine nucleotide exchange factor 1
K22449	2	tubulin-specific chaperone cofactor E-like protein
K15143	2	mediator of RNA polymerase II transcription subunit 30
K15410	2	elongation factor 1-delta
K07520	2	actin-binding LIM protein
K22527	2	Cbp/p300-interacting transactivator 1
K15409	2	serine/threonine-protein kinase SRPK1 [EC:2.7.11.1]
K13886	2	coronin-1B/1C/6
K13215	2	nuclear receptor-interacting protein 2
K13217	2	pre-mRNA-processing factor 39
K21418	2	heme oxygenase 2 [EC:1.14.14.18]
K22526	2	myocardin
K13872	2	solute carrier family 7 (L-type amino acid transporter), member 6
K07513	2	acetyl-CoA acyltransferase 1 [EC:2.3.1.16]
K21433	2	ankyrin repeat domain-containing protein 1
K21435	2	ankyrin repeat domain-containing protein 6
K08532	2	RAR-related orphan receptor alpha
K07466	2	replication factor A1
K13863	2	solute carrier family 7 (cationic amino acid transporter), member 1
K07442	2	tRNA (adenine57-N1/adenine58-N1)-methyltransferase catalytic subunit [EC:2.1.1.219 2.1.1.220]
K21436	2	ankyrin repeat domain-containing protein 11/12
K13218	2	polypyrimidine tract-binding protein 1
K06471	2	platelet/endothelial cell adhesion molecule
K21440	2	ankyrin repeat domain-containing protein 50
K07434	2	aromatase [EC:1.14.14.14]
K07431	2	sterol 12-alpha-hydroxylase [EC:1.14.14.139]
K15380	2	solute carrier family 48 (heme transporter), member 1
K15379	2	solute carrier family 45, member 3
K06474	2	CD34 antigen
K10707	2	vesicle-associated membrane protein-associated protein B
K12391	2	AP-1 complex subunit gamma-1
K16482	2	centriolar protein POC1
K18617	2	allograft inflammatory factor 1
K09877	2	aquaporin-9
K17387	2	kinesin family member 23
K18618	2	growth arrest-specific protein 7
K09993	2	cyclin-dependent kinase inhibitor 1C
K09995	2	homeobox protein Nkx-3.2
K17388	2	Rho-associated protein kinase 2 [EC:2.7.11.39]
K10031	2	C-X-C motif chemokine 12
K11318	2	ataxin-7
K18595	2	echinoderm microtubule-associated protein-like 1/2
K11307	2	histone acetyltransferase MYST2 [EC:2.3.1.48]
K18588	2	coenzyme Q-binding protein COQ10
K11290	2	template-activating factor I
K18584	2	actin-related protein 3
K18575	2	alkenylglycerophosphocholine hydrolase [EC:3.3.2.2]
K09870	2	aquaporin-11
K09866	2	aquaporin-4
K18269	2	programmed cell death protein 10
K17354	2	tetraspanin-2
K09663	2	beta-1,6-N-acetylglucosaminyltransferase 4 [EC:2.4.1.-]
K11366	2	ubiquitin carboxyl-terminal hydrolase 22/27/51 [EC:3.4.19.12]
K09668	2	glycosyltransferase-like protein LARGE [EC:2.4.2.- 2.4.1.-]
K11363	2	SAGA-associated factor 11
K17350	2	tetraspanin-9
K11349	2	bromodomain-containing protein 1
K09680	2	type II pantothenate kinase [EC:2.7.1.33]
K09864	2	aquaporin-1
K18655	2	ATP-dependent RNA helicase DDX19/DBP5 [EC:5.6.2.7]
K09850	2	Ras association domain-containing protein 1
K09851	2	Ras association domain-containing protein 2/4
K11339	2	mortality factor 4-like protein 1
K11322	2	enhancer of polycomb-like protein
K09863	2	aquaporin-0
K11279	2	nucleosome assembly protein 1-like 1
K14380	2	four and a half LIM domains protein 2
K10077	2	layilin
K10268	2	F-box and leucine-rich repeat protein 2/20
K14862	2	nucleolar pre-ribosomal-associated protein 2
K14386	2	solute carrier family 5 (sodium-dependent multivitamin transporter), member 6
K10251	2	17beta-estradiol 17-dehydrogenase / very-long-chain 3-oxoacyl-CoA reductase [EC:1.1.1.62 1.1.1.330]
K11206	2	deaminated glutathione amidase [EC:3.5.1.128]
K11188	2	peroxiredoxin 6 [EC:1.11.1.7 1.11.1.27 3.1.1.-]
K18400	2	KAT8 regulatory NSL complex subunit 1
K11170	2	dehydrogenase/reductase SDR family member X [EC:1.1.-.-]
K18496	2	fibroblast growth factor 1
K10269	2	F-box and leucine-rich repeat protein 3
K10276	2	F-box and leucine-rich repeat protein 10/11 [EC:1.14.11.27]
K10280	2	F-box and leucine-rich repeat protein 14
K11169	2	dehydrogenase/reductase SDR family member 13 [EC:1.1.-.-]
K17443	2	homrobox protein Hox-A10
K18309	2	aspartate N-acetyltransferase [EC:2.3.1.17]
K14383	2	solute carrier family 5 (sodium/myo-inositol cotransporter), member 3
K11256	2	nuclear receptor coactivator 3 [EC:2.3.1.48]
K10179	2	T-box protein 5
K11268	2	N-acetyltransferase [EC:2.3.1.-]
K18435	2	transcription factor SOX9 (SOX group E)
K10172	2	brachyury protein
K18436	2	high affinity cAMP-specific 3',5'-cyclic phosphodiesterase 7 [EC:3.1.4.53]
K18437	2	high affinity cAMP-specific and IBMX-insensitive 3',5'-cyclic phosphodiesterase 8 [EC:3.1.4.53]
K14411	2	RNA-binding protein Musashi
K10159	2	toll-like receptor 2
K10146	2	cyclin G2
K18458	2	N-acyl-aromatic-L-amino acid amidohydrolase [EC:3.5.1.114]
K10138	2	insulin-like growth factor-binding protein 3
K11274	2	chromosome transmission fidelity protein 4
K10129	2	G-2 and S-phase expressed protein 1
K10128	2	reprimo, TP53-dependent G2 arrest mediator candidate
K18492	2	insulin gene enhancer protein ISL-2
K11368	2	enhancer of yellow 2 transcription factor
K09660	2	mannose-P-dolichol utilization defect 1
K17346	2	tetraspanin-33
K09507	2	DnaJ homolog subfamily B member 1
K19327	2	anoctamin-10
K09489	2	heat shock 70kDa protein 4
K11429	2	[histone H4]-N-methyl-L-lysine20 N-methyltransferase [EC:2.1.1.362]
K19289	2	peripheral myelin protein 22
K09503	2	DnaJ homolog subfamily A member 2
K09504	2	DnaJ homolog subfamily A member 3
K19196	2	breast cancer metastasis-suppressor 1 and related proteins
K09527	2	DnaJ homolog subfamily C member 7
K09511	2	DnaJ homolog subfamily B member 5
K09515	2	DnaJ homolog subfamily B member 9
K09516	2	all-trans-retinol 13,14-reductase [EC:1.3.99.23]
K19179	2	glycerophosphoinositol glycerophosphodiesterase [EC:3.1.4.44]
K09518	2	DnaJ homolog subfamily B member 12
K09523	2	DnaJ homolog subfamily C member 3
K09455	2	microphthalmia-associated transcription factor
K11446	2	[histone H3]-trimethyl-L-lysine4 demethylase [EC:1.14.11.67]
K19365	2	seipin
K09448	2	transcriptional enhancer factor
K11447	2	lysine-specific demethylase 6A [EC:1.14.11.68]
K19366	2	spartin
K17289	2	cellular retinoic acid-binding protein 2
K09442	2	SAM pointed domain-containing ETS transcription factor
K11454	2	chromobox protein 7
K09438	2	transcription factor PU.1
K09430	2	ETS domain-containing protein Elk-3 (SRF accessory protein 2)
K11456	2	polyhomeotic-like protein 1
K19374	2	DnaJ homolog subfamily C member 30
K11458	2	polyhomeotic-like protein 3
K19382	2	tectonic-1/3
K09410	2	forkhead box protein Q
K09408	2	forkhead box protein O3
K11426	2	[histone H3]-lysine4/36 N-trimethyltransferase SMYD [EC:2.1.1.354 2.1.1.357]
K19030	2	6-phosphofructo-2-kinase / fructose-2,6-biphosphatase 4 [EC:2.7.1.105 3.1.3.46]
K18710	2	histone RNA hairpin-binding protein
K09624	2	neurotrypsin [EC:3.4.21.-]
K17337	2	cellular retinoic acid-binding protein 1
K18762	2	zygote arrest protein 1
K09592	2	hypoxia-inducible factor prolyl hydroxylase [EC:1.14.11.29]
K09593	2	GRB2-associated-binding protein 1
K17339	2	atlastin [EC:3.6.5.-]
K18743	2	caprin-1
K18741	2	protein nanos 1
K19029	2	6-phosphofructo-2-kinase / fructose-2,6-biphosphatase 2 [EC:2.7.1.105 3.1.3.46]
K09633	2	transmembrane protease serine 2 [EC:3.4.21.122]
K18733	2	la-related protein 6
K18730	2	PERQ amino acid-rich with GYF domain-containing protein
K09640	2	transmembrane protease serine 9 [EC:3.4.21.-]
K18727	2	transportin-2
K09651	2	rhomboid-related protein 4 [EC:3.4.21.105]
K18772	2	C->U-editing enzyme APOBEC2 [EC:3.5.4.-]
K11406	2	histone deacetylase 4/5 [EC:3.5.1.98]
K09577	2	FK506-binding protein 14 [EC:5.2.1.8]
K09574	2	FK506-binding protein 8 [EC:5.2.1.8]
K09571	2	FK506-binding protein 4/5 [EC:5.2.1.8]
K11413	2	NAD-dependent protein deacetylase sirtuin 3 [EC:2.3.1.286]
K17332	2	nuclear factor of activated T-cells, cytoplasmic 2
K14379	2	tartrate-resistant acid phosphatase type 5 [EC:3.1.3.2]
K14962	2	COMPASS component SWD2
K18977	2	hemopexin
K18993	2	ubiquitin-associated and SH3 domain-containing protein [EC:3.1.3.48]
K19006	2	phosphatidylinositol phospholipase C, eta [EC:3.1.4.11]
K09554	2	cell division cycle protein 37
K09549	2	prefoldin subunit 2
K19021	2	cGMP-inhibited 3',5'-cyclic phosphodiesterase A [EC:3.1.4.17]
K09531	2	DnaJ homolog subfamily C member 11
K11420	2	[histone H3]-lysine9 N-trimethyltransferase EHMT [EC:2.1.1.355]
K18271	2	retinol-binding protein 4
K18265	2	integral membrane protein 2C
K09405	2	forkhead box protein L
K10788	2	eosinophil peroxidase [EC:1.11.1.7]
K10839	2	UV excision repair protein RAD23
K10808	2	ribonucleoside-diphosphate reductase subunit M2 [EC:1.17.4.1]
K10532	2	heparan-alpha-glucosaminide N-acetyltransferase [EC:2.3.1.78]
K10807	2	ribonucleoside-diphosphate reductase subunit M1 [EC:1.17.4.1]
K10798	2	poly [ADP-ribose] polymerase 2/3/4 [EC:2.4.2.30]
K17848	2	Arf-GAP with GTPase, ANK repeat and PH domain-containing protein 2
K10576	2	ubiquitin-conjugating enzyme E2 H [EC:2.3.2.23]
K14396	2	polyadenylate-binding protein 2
K10577	2	ubiquitin-conjugating enzyme E2 I
K10779	2	transcriptional regulator ATRX
K10580	2	ubiquitin-conjugating enzyme E2 N [EC:2.3.2.23]
K17824	2	DCN1-like protein 4/5
K10770	2	alkylated DNA repair protein alkB homolog 8 [EC:1.14.11.- 2.1.1.229]
K17821	2	E3 ubiquitin-protein ligase RNF165 [EC:2.3.2.27]
K10522	2	diablo
K10518	2	zinc finger and BTB domain-containing protein 47
K10297	2	F-box protein 11
K10494	2	zinc finger and BTB domain-containing protein 7
K17577	2	SH2 domain-containing protein 4A
K10482	2	BTB/POZ domain-containing protein 10
K17921	2	sorting nexin-7/30
K17920	2	sorting nexin-5/6/32
K17919	2	sorting nexin-4
K17918	2	sorting nexin-3/12
K10495	2	zinc finger and BTB domain-containing protein 8
K10843	2	DNA excision repair protein ERCC-3 [EC:5.6.2.4]
K17917	2	sorting nexin-1/2
K17916	2	kinesin family member 16B
K17592	2	sacsin
K17907	2	autophagy-related protein 9
K10502	2	zinc finger and BTB domain-containing protein 22
K17906	2	autophagy-related protein 2
K17812	2	cytochrome P450 family 1 subfamily C
K17804	2	mitochondrial import inner membrane translocase subunit TIM44
K17800	2	LETM1 and EF-hand domain-containing protein 1, mitochondrial
K17701	2	signal-induced proliferation-associated 1 like protein 1
K10659	2	E3 ubiquitin-protein ligase MARCH4/9/11 [EC:2.3.2.27]
K10756	2	replication factor C subunit 3/5
K10660	2	E3 ubiquitin-protein ligase MARCH5 [EC:2.3.2.27]
K10753	2	histone chaperone ASF1
K10661	2	E3 ubiquitin-protein ligase MARCH6 [EC:2.3.2.27]
K10752	2	histone-binding protein RBBP4
K10686	2	NEDD8-activating enzyme E1 [EC:6.2.1.64]
K17795	2	mitochondrial import inner membrane translocase subunit TIM17
K17635	2	ral guanine nucleotide dissociation stimulator-like 1
K10692	2	ligand of Numb protein X 1/2 [EC:2.3.2.27]
K10739	2	replication factor A2
K17681	2	ATPase family AAA domain-containing protein 3A/B
K10695	2	E3 ubiquitin-protein ligase RNF1/2 [EC:2.3.2.27]
K17686	2	P-type Cu+ transporter [EC:7.2.2.8]
K10758	2	thiol oxidase [EC:1.8.3.2]
K10656	2	E3 ubiquitin-protein ligase MARCH1/8 [EC:2.3.2.27]
K10649	2	tripartite motif-containing protein 9/67
K10645	2	E3 ubiquitin-protein ligase mind-bomb [EC:2.3.2.27]
K10643	2	CCR4-NOT transcription complex subunit 4 [EC:2.3.2.27]
K10641	2	E3 ubiquitin-protein ligase LRSAM1 [EC:2.3.2.27]
K17770	2	mitochondrial import receptor subunit TOM20
K10631	2	E3 ubiquitin-protein ligase Topors [EC:2.3.2.27]
K10630	2	RanBP-type and C3HC4-type zinc finger-containing protein 1 [EC:2.3.2.31]
K17612	2	calcineurin B homologous protein 3
K10628	2	V(D)J recombination-activating protein 1 [EC:2.3.2.27]
K10624	2	E3 ubiquitin-protein ligase RBBP6 [EC:2.3.2.27]
K17780	2	mitochondrial import inner membrane translocase subunit TIM8
K10612	2	cullin 5
K17782	2	mitochondrial intermembrane space import and assembly protein 40
K10609	2	cullin 4
K17784	2	MICOS complex subunit MIC10
K17569	2	G patch domain-containing protein 2
K10876	2	RAD54-like protein 2 [EC:5.6.2.-]
K10477	2	BTB/POZ domain-containing protein 1/2
K10383	2	envoplakin
K17503	2	protein phosphatase 1H [EC:3.1.3.16]
K17505	2	protein phosphatase 1K [EC:3.1.3.16]
K18154	2	regulator of G-protein signaling 2
K10373	2	tropomyosin 1
K10375	2	tropomyosin 4
K18083	2	myotubularin-related protein 6/7/8 [EC:3.1.3.64 3.1.3.95]
K10387	2	plakophilin 1
K17520	2	C-type lectin domain family 3 member B
K18082	2	myotubularin-related protein 3/4 [EC:3.1.3.48 3.1.3.64 3.1.3.95]
K17508	2	protein phosphatase PTC7 [EC:3.1.3.16]
K14403	2	cleavage and polyadenylation specificity factor subunit 3 [EC:3.1.27.-]
K10392	2	kinesin family member 1
K17510	2	tyrosine-protein kinase STYK1 [EC:2.7.10.2]
K10396	2	kinesin family member 5
K17498	2	transcription factor SPN1
K10364	2	F-actin-capping protein subunit alpha
K14404	2	cleavage and polyadenylation specificity factor subunit 4
K17492	2	ubinuclein
K17491	2	protein phosphatase 4 regulatory subunit 3
K17478	2	FK506-binding protein 15
K10351	2	myosin regulatory light chain 2
K17477	2	FERM, RhoGEF and pleckstrin domain-containing protein 1
K10345	2	SPRY domain-containing SOCS box protein 3
K17460	2	Bcl-2-modifying factor
K10335	2	ankyrin repeat and SOCS box protein 13
K10334	2	ankyrin repeat and SOCS box protein 12
K18175	2	cytochrome c oxidase assembly factor 3, animal type
K11140	2	aminopeptidase N [EC:3.4.11.2]
K10312	2	F-box protein 36
K10305	2	F-box protein 25/32
K18245	2	carbonic anhydrase 2 [EC:4.2.1.1]
K17517	2	C-type lectin domain family 12 member B
K18047	2	serine/threonine/tyrosine-interacting-like protein 1
K17567	2	protein phosphatase 1 regulatory subunit 28
K17936	2	sorting nexin-27
K17563	2	MICOS complex subunit MIC19
K10449	2	kelch-like protein 11
K17963	2	peroxisome proliferator-activated receptor gamma coactivator-related protein 1
K17943	2	pumilio RNA-binding family
K17941	2	sorting nexin-22/24
K10456	2	kelch-like protein 19
K17564	2	MICOS complex subunit MIC25
K11064	2	monocyte to macrophage differentiation protein
K17566	2	protein phosphatase 1 regulatory subunit 27
K17934	2	NADPH oxidase organizer 1
K10467	2	kelch-like protein 31
K17928	2	sorting nexin-16
K10473	2	kelch repeat and BTB domain-containing protein 5/10
K17926	2	sorting nexin-14
K17558	2	protein phosphatase 1 regulatory subunit 15B
K10447	2	kelch-like protein 9/13
K10443	2	kelch-like protein 2/3
K10442	2	kelch-like protein 1/4/5
K17554	2	apoptosis-stimulating of p53 protein 1
K10893	2	fanconi anemia group F protein
K10433	2	microtubule-associated protein 7
K10432	2	microtubule-associated protein 6
K17986	2	FUN14 domain-containing protein 1
K17987	2	next to BRCA1 gene 1 protein
K10956	2	protein transport protein SEC61 subunit alpha
K10428	2	dynactin 6
K17988	2	tectonin beta-propeller repeat-containing protein 1
K10419	2	dynein light chain roadblock-type
K17529	2	uncharacterized serine/threonine-protein kinase SgK494 [EC:2.7.11.1]
K18033	2	receptor-type tyrosine-protein phosphatase epsilon [EC:3.1.3.48]
K10416	2	dynein cytoplasmic 1 light intermediate chain
K17278	2	membrane-associated progesterone receptor component
K17274	2	protein S100-A10
K20164	2	DENN domain-containing protein 5
K08823	2	dual specificity protein kinase CLK2/3 [EC:2.7.12.1]
K08815	2	tau tubulin kinase [EC:2.7.11.26]
K12196	2	vacuolar protein-sorting-associated protein 4
K12195	2	charged multivesicular body protein 6
K19936	2	visinin-like protein 1
K08820	2	cyclin-dependent kinase 16 [EC:2.7.11.22]
K19931	2	protein lin-7
K12194	2	charged multivesicular body protein 4A/B
K08812	2	CaM kinase-like vesicle-associated [EC:2.7.11.-]
K16641	2	hepatoma-derived growth factor
K16656	2	neurexophilin-1
K16660	2	reticulon-4 receptor-like 1
K14525	2	ribonucleases P/MRP protein subunit RPP25 [EC:3.1.26.5]
K08829	2	male germ cell-associated kinase [EC:2.7.11.22]
K12171	2	E3 ubiquitin-protein ligase SH3RF [EC:2.3.2.27]
K08814	2	tribbles homolog 1/2
K12198	2	charged multivesicular body protein 5
K16738	2	nuclear distribution protein NudE
K08798	2	MAP/microtubule affinity-regulating kinase [EC:2.7.11.1]
K16584	2	HAUS augmin-like complex subunit 1
K08793	2	serine/threonine kinase 32 [EC:2.7.11.1]
K12316	2	lysosomal alpha-glucosidase [EC:3.2.1.20]
K08796	2	BR serine/threonine kinase [EC:2.7.11.1]
K12309	2	beta-galactosidase [EC:3.2.1.23]
K12307	2	MFS transporter, ceroid-lipofuscinosis neuronal protein 7
K12304	2	soluble calcium-activated nucleotidase 1 [EC:3.6.1.6]
K19942	2	dynein regulatory complex subunit 4
K08802	2	SNF related kinase [EC:2.7.11.1]
K14527	2	ribonuclease P/MRP protein subunit RPP20 [EC:3.1.26.5]
K12301	2	MFS transporter, ACS family, solute carrier family 17 (sodium-dependent inorganic phosphate cotransporter), member 5
K12298	2	bile salt-stimulated lipase [EC:3.1.1.3 3.1.1.13]
K16608	2	tubulin monoglycylase TTLL3/8 [EC:6.3.2.-]
K19944	2	TBC1 domain family member 10
K19917	2	double C2-like domain-containing protein beta
K12158	2	ubiquitin-like protein Nedd8
K08835	2	serine/threonine-protein kinase OSR1/STK39 [EC:2.7.11.1]
K19765	2	heat shock factor-binding protein 1
K16684	2	merlin
K08878	2	breakpoint cluster region protein [EC:2.7.11.1]
K16687	2	transcriptional coactivator YAP1
K16717	2	centrosomal protein CEP97
K08886	2	activated CDC42 kinase 1 [EC:2.7.10.2 2.7.11.1]
K19770	2	ribonuclease kappa [EC:3.1.-.-]
K14358	2	secernin
K08841	2	testis-specific kinase 1 [EC:2.7.12.1]
K08955	2	ATP-dependent metalloprotease [EC:3.4.24.-]
K08956	2	AFG3 family protein [EC:3.4.24.-]
K14361	2	organic solute transporter subunit beta
K08959	2	casein kinase 1, delta [EC:2.7.11.1]
K08960	2	casein kinase 1, epsilon [EC:2.7.11.1]
K16732	2	Ase1/PRC1/MAP65 family protein
K08875	2	nuclear receptor-binding protein
K14356	2	solute carrier organic anion transporter family, member 5A
K16681	2	protein crumbs
K16675	2	palmitoyltransferase ZDHHC14/18 [EC:2.3.1.225]
K19876	2	metalloreductase STEAP4 [EC:1.16.1.-]
K12041	2	solute carrier family 9 (sodium/hydrogen exchanger), member 6/7
K12042	2	troponin C, skeletal muscle
K14454	2	aspartate aminotransferase, cytoplasmic [EC:2.6.1.1]
K14523	2	ribonucleases P/MRP protein subunit RPP38 [EC:3.1.26.5]
K08859	2	serine/threonine kinase 35 [EC:2.7.11.1]
K08857	2	serine/threonine-protein kinase Nek1/4/5 [EC:2.7.11.1]
K08853	2	AP2-associated kinase [EC:2.7.11.1]
K16673	2	LIX1-like protein
K08852	2	serine/threonine-protein kinase/endoribonuclease IRE1 [EC:2.7.11.1 3.1.26.-]
K08851	2	TP53 regulating kinase and related kinases [EC:2.7.11.1]
K08849	2	mixed lineage kinase domain-like [EC:2.7.11.1]
K08847	2	receptor-interacting serine/threonine-protein kinase 3 [EC:2.7.11.1]
K08791	2	serine/threonine-protein kinase LATS1/2 [EC:2.7.11.1]
K12320	2	heat-stable enterotoxin receptor [EC:4.6.1.2]
K08790	2	serine/threonine kinase 38 [EC:2.7.11.1]
K12417	2	acyl-CoA thioesteraes 11 [EC:3.1.2.-]
K14570	2	RNA exonuclease [EC:3.1.-.-]
K20119	2	bridging integrator 2
K14353	2	solute carrier organic anion transporter family, member 3A
K08594	2	sentrin-specific protease 5 [EC:3.4.22.68]
K16501	2	cadherin-related family member 1
K16506	2	protocadherin Fat 1/2/3
K20068	2	RalBP1-associated Eps domain-containing protein
K12398	2	AP-3 complex subunit mu
K20064	2	growth factor receptor-bound protein 10
K08629	2	a disintegrin and metalloproteinase with thrombospondin motifs 15 [EC:3.4.24.-]
K20055	2	amyloid beta A4 precursor protein-binding family A member 2
K16507	2	protocadherin-16/23
K08648	2	hyaluronan binding protein 2 [EC:3.4.21.-]
K08656	2	dipeptidyl-peptidase 9 [EC:3.4.14.5]
K08568	2	cathepsin X [EC:3.4.18.1]
K08563	2	nuclear receptor subfamily 0 group B member 2
K14349	2	neutral cholesterol ester hydrolase 1 [EC:3.1.1.-]
K20125	2	F-BAR and double SH3 domains protein
K08558	2	nuclear receptor subfamily 4 group A member 2
K20127	2	BAI1-associated protein 2-like protein 1
K14347	2	solute carrier family 10 (sodium/bile acid cotransporter), member 7
K08553	2	estrogen-related receptor beta
K08551	2	estrogen receptor beta
K12473	2	low-density lipoprotein receptor
K12483	2	EH domain-containing protein 1
K08549	2	nuclear receptor subfamily 2 group F member 6
K12486	2	stromal membrane-associated protein
K08546	2	nuclear receptor subfamily 2 group E member 3
K12488	2	Arf-GAP with SH3 domain, ANK repeat and PH domain-containing protein
K20160	2	DENN domain-containing protein 1
K12491	2	Arf-GAP with GTPase, ANK repeat and PH domain-containing protein 1/3/4/5/6/9/11
K12399	2	AP-3 complex subunit sigma
K12395	2	AP-1 complex subunit sigma-3
K12322	2	guanylate cyclase 2F [EC:4.6.1.2]
K12333	2	adrenomedullin
K12349	2	neutral ceramidase [EC:3.5.1.23]
K08751	2	fatty acid-binding protein 2, intestinal
K16571	2	gamma-tubulin complex component 4
K08755	2	fatty acid-binding protein 6, ileal (gastrotropin)
K08756	2	fatty acid-binding protein 7, brain
K08758	2	apolipoprotein A-II
K19985	2	exocyst complex component 6
K08670	2	suppressor of tumorigenicity protein 14 [EC:3.4.21.109]
K12328	2	protein phosphatase 1 regulatory subunit 14A
K12327	2	caldesmon
K08767	2	angiopoietin-like 4
K19969	2	2-epi-5-epi-valiolone synthase [EC:4.2.3.152]
K12324	2	atrial natriuretic peptide receptor B [EC:4.6.1.2]
K19948	2	MICAL-like protein 1
K14801	2	pre-rRNA-processing protein TSR4
K16545	2	phospholipase DDHD2 [EC:3.1.1.-]
K08749	2	solute carrier family 27 (fatty acid transporter), member 6
K12354	2	ectonucleotide pyrophosphatase/phosphodiesterase family member 7 [EC:3.1.4.12]
K08745	2	solute carrier family 27 (fatty acid transporter), member 1/4 [EC:6.2.1.-]
K14559	2	U3 small nucleolar RNA-associated protein MPP10
K12373	2	hexosaminidase [EC:3.2.1.52]
K12384	2	lysosome membrane protein 2
K20012	2	growth differentiation factor 6
K08731	2	baculoviral IAP repeat-containing protein 5
K08729	2	phosphatidylserine synthase 1 [EC:2.7.8.-]
K12388	2	sortilin
K10712	2	cysteamine dioxygenase [EC:1.13.11.19]
K08716	2	solute carrier family 14 (urea transporter)
K12392	2	AP-1 complex subunit beta-1
K20040	2	huntingtin-interacting protein 1-related protein
K20042	2	F-BAR domain only protein
K09022	2	2-iminobutanoate/2-iminopropanoate deaminase [EC:3.5.99.10]
K19721	2	collagen type V/XI/XXIV/XXVII, alpha
K11471	2	additional sex combs-like protein
K19489	2	doublesex- and mab-3-related transcription factor 2
K11649	2	SWI/SNF-related matrix-associated actin-dependent regulator of chromatin subfamily C
K09306	2	homeobox protein HoxA/B/C6
K09308	2	homeobox protein HoxB/C/D8
K09309	2	homeobox protein Nkx-1
K09310	2	homeobox protein GSH
K11648	2	SWI/SNF-related matrix-associated actin-dependent regulator of chromatin subfamily B member 1
K09314	2	homeobox protein DLX1/4/6
K09302	2	homeobox protein HoxA/B2
K09317	2	homeobox protein EMX
K09318	2	homeobox protein ventral anterior
K11644	2	paired amphipathic helix protein Sin3a
K09320	2	homeobox even-skipped homolog protein
K11594	2	ATP-dependent RNA helicase DDX3X [EC:5.6.2.7]
K19480	2	anoctamin-5
K11651	2	SWI/SNF-related matrix-associated actin-dependent regulator of chromatin subfamily E member 1
K09299	2	zinc finger homeobox protein 1
K09030	2	fos-like antigen 2
K16942	2	septin 2
K11718	2	UDP-glucose:glycoprotein glucosyltransferase [EC:2.4.1.-]
K09233	2	zinc finger protein GLIS2
K09234	2	Wilms tumor protein 1
K16939	2	septin 6/8/11
K16940	2	septin 10
K09262	2	MADS-box transcription enhancer factor 2D
K16944	2	septin 7
K09297	2	homeobox protein HoxC/D12
K19502	2	anoctamin-8
K19501	2	anoctamin-7
K19495	2	juxtaposed with another zinc finger protein 1
K19491	2	doublesex- and mab-3-related transcription factor 4/5
K09296	2	homeobox protein HoxC/D11
K16949	2	amine sulfotransferase [EC:2.8.2.3]
K17081	2	prohibitin 2
K19479	2	collagen type X alpha
K19478	2	dolichyl-diphosphooligosaccharide---protein glycosyltransferase subunit MAGT1/TUSC3
K09382	2	paired box protein 1/9
K11514	2	Borealin
K17252	2	clusterin
K09371	2	LIM homeobox transcription factor 1
K19404	2	phosphatidic acid-selective phospholipase A1 [EC:3.1.1.-]
K17255	2	Rab GDP dissociation inhibitor
K17261	2	adenylyl cyclase-associated protein
K09391	2	transcription factor E2F7/8
K19477	2	cGMP-dependent protein kinase 2 [EC:2.7.11.12]
K09396	2	forkhead box protein C
K19387	2	caveolae-associated protein 1
K09399	2	forkhead box protein F
K19384	2	transmembrane protein 17
K14365	2	four and a half LIM domains protein 1
K09402	2	forkhead box protein J1
K09361	2	BarH-like homeobox
K17200	2	ADP-ribosylation factor-like protein 14
K09355	2	pre-B-cell leukemia transcription factor 1
K14427	2	solute carrier family 12 (potassium/chloride transporter), member 4/6
K17197	2	NF-kappa-B inhibitor-interacting Ras-like protein
K17099	2	annexin A13
K19467	2	matrilin
K17092	2	annexin A2
K19470	2	complement C1q tumor necrosis factor-related protein 1/6/8
K09344	2	homeobox protein Nkx-2.4
K09343	2	homeobox protein Nkx-2.3
K17091	2	annexin A1
K11564	2	kinetochore protein Mis18
K09336	2	visual system homeobox protein 2
K09332	2	retina and anterior neural fold homeobox protein
K17089	2	annexin A3
K09331	2	short stature homeobox protein
K09232	2	zinc finger protein GLIS1/3
K14841	2	ribosome biogenesis protein NSA1
K19534	2	synaptonemal complex central element protein 1
K09068	2	T-cell acute lymphocytic leukemia protein
K09058	2	thyrotrophic embryonic factor
K16772	2	protein FAM161A
K09063	2	transcription factor E2-alpha
K09064	2	myogenic factor 3
K19677	2	intraflagellar transport protein 81
K09067	2	achaete-scute complex protein
K11848	2	ubiquitin carboxyl-terminal hydrolase 20/33 [EC:3.4.19.12]
K16795	2	platelet-activating factor acetylhydrolase IB subunit beta/gamma [EC:3.1.1.47]
K09075	2	nescient helix-loop-helix protein
K09076	2	mesoderm posterior
K09079	2	neurogenic differentiation factor 4
K09080	2	neurogenic differentiation factor 6
K16779	2	Rab-3A-interacting protein
K09086	2	class B basic helix-loop-helix protein 4/5
K16771	2	centrosome and spindle pole-associated protein 1
K11860	2	OTU domain-containing protein 7 [EC:3.4.19.12]
K11862	2	ubiquitin thioesterase ZRANB1 [EC:3.4.19.12]
K16756	2	BICD family-like cargo adapter
K11967	2	ankyrin repeat and IBR domain-containing protein 1 [EC:2.3.2.31]
K09047	2	cyclic AMP-responsive element-binding protein 5
K16749	2	Bardet-Biedl syndrome 7 protein
K09045	2	activating transcription factor 7
K11971	2	E3 ubiquitin-protein ligase RNF14 [EC:2.3.2.31]
K11972	2	E3 ubiquitin-protein ligase RNF19A [EC:2.3.2.31]
K11974	2	E3 ubiquitin-protein ligase RNF31 [EC:2.3.2.31]
K11975	2	E3 ubiquitin-protein ligase RNF144 [EC:2.3.2.31]
K11980	2	E3 ubiquitin-protein ligase RNF11
K09034	2	ATF-like basic leucine zipper transcriptional factor
K11983	2	E3 ubiquitin-protein ligase RNF182 [EC:2.3.2.27]
K16739	2	nuclear distribution protein NudE-like 1
K11988	2	sonic hedgehog
K16794	2	platelet-activating factor acetylhydrolase IB subunit alpha
K11834	2	ubiquitin carboxyl-terminal hydrolase 44/49 [EC:3.4.19.12]
K11722	2	bromodomain-containing protein 4
K09206	2	krueppel-like factor 5
K09195	2	transcription factor Sp5
K19572	2	adenosine deaminase CECR1 [EC:3.5.4.4]
K09198	2	transcription factor Sp8
K09201	2	transcription factor YY
K19538	2	retinitis pigmentosa 1
K09205	2	krueppel-like factor 8/12
K16859	2	placenta growth factor
K09099	2	aryl hydrocarbon receptor nuclear translocator-like protein 2
K09209	2	krueppel-like factor 10/11
K16861	2	inactive phospholipase D5
K09215	2	odd-skipped
K09216	2	ovo
K11725	2	phospholysine phosphohistidine inorganic pyrophosphate phosphatase [EC:3.6.1.1 3.1.3.-]
K16865	2	programmed cell death protein 4
K14429	2	solute carrier family 12 (potassium/chloride transporters), member 9
K19574	2	obscurin-like protein 1
K16847	2	T-lymphoma invasion and metastasis-inducing protein 2
K11792	2	DET1- and DDB1-associated protein 1
K11798	2	bromodomain and WD repeat domain containing protein 1/3
K09188	2	[histone H3]-lysine4 N-trimethyltransferase MLL3 [EC:2.1.1.354]
K19600	2	tubby and related proteins
K09175	2	DNA-binding protein RFX7
K16815	2	calcium-independent phospholipase A2-gamma
K09171	2	nuclear factor I/X
K11810	2	MFS transporter, MCT family, solute carrier family 16 (monocarboxylic acid transporters), member 12
K16806	2	MAP7 domain-containing protein 1
K09108	2	transcription factor AP-4
K19625	2	retinaldehyde-binding protein 1
K11833	2	ubiquitin carboxyl-terminal hydrolase 2 [EC:3.4.19.12]
K09103	2	early B-cell factor
K09100	2	single-minded
[truncated: 6,510 more rows]
