# Supplementary material for: Genome Refinement in Pacific Bluefin Tuna (Thunnus orientalis): Chromosome-level Assembly Using Hybrid Linkage Data
Source: Research Square preprint supplement (doi:10.21203/rs.3.rs-7883235/v1), 2025-11-04
Supplement: Supplementary file 3 [file e04fbda161acb4df89f1b00d.xlsx]

## Sheet: Sheet1
new_chromosome	sub_scaffolds	n_subscaffolds
C00000000010_linkage_scaffold_10	['BOUD02000055.1', 'BOUD02000082.1', 'BOUD02000422.1', 'BOUD02000338.1', 'BOUD02000460.1', 'BOUD02000224.1', 'BOUD02000221.1', 'BOUD02000007.1', 'BOUD02000052.1', 'BOUD02000114.1', 'BOUD02000255.1', 'BOUD02000325.1', 'BOUD02000099.1', 'BOUD02000172.1']	14
C00000000011_linkage_scaffold_11	['BOUD02000350.1', 'BOUD02000273.1', 'BOUD02000217.1', 'BOUD02000019.1', 'BOUD02000503.1', 'BOUD02000018.1', 'BOUD02000143.1', 'BOUD02000251.1', 'BOUD02000053.1_1', 'BOUD02000053.1_2']	10
C00000000012_linkage_scaffold_12	['BOUD02000225.1_1', 'BOUD02000263.1', 'BOUD02000078.1', 'BOUD02000156.1', 'BOUD02000216.1', 'BOUD02000091.1_3', 'BOUD02000449.1', 'BOUD02000059.1_1', 'BOUD02000295.1', 'BOUD02000200.1', 'BOUD02000005.1', 'BOUD02000520.1']	12
C00000000013_linkage_scaffold_13	['BOUD02000399.1', 'BOUD02000218.1', 'BOUD02000040.1', 'BOUD02000025.1', 'BOUD02000442.1', 'BOUD02000015.1', 'BOUD02000074.1', 'BOUD02000490.1', 'BOUD02000110.1', 'BOUD02000101.1', 'BOUD02000555.1', 'BOUD02000141.1', 'BOUD02000458.1', 'BOUD02000122.1', 'BOUD02000109.1', 'BOUD02000153.1', 'BOUD02000193.1']	17
C00000000014_linkage_scaffold_14	['BOUD02000208.1', 'BOUD02000272.1', 'BOUD02000373.1', 'BOUD02000107.1_1', 'BOUD02000157.1', 'BOUD02000432.1', 'BOUD02000125.1', 'BOUD02000256.1', 'BOUD02000168.1', 'BOUD02000192.1', 'BOUD02000142.1', 'BOUD02000457.1', 'BOUD02000540.1', 'BOUD02000012.1', 'BOUD02000211.1', 'BOUD02000017.1', 'BOUD02000375.1']	17
C00000000015_linkage_scaffold_15	['BOUD02000551.1', 'BOUD02000004.1', 'BOUD02000238.1', 'BOUD02000266.1', 'BOUD02000279.1']	5
C00000000016_linkage_scaffold_16	['BOUD02000230.1', 'BOUD02000400.1', 'BOUD02000027.1', 'BOUD02000039.1', 'BOUD02000022.1', 'BOUD02000065.1', 'BOUD02000329.1', 'BOUD02000351.1', 'BOUD02000088.1', 'BOUD02000408.1', 'BOUD02000085.1', 'BOUD02000478.1', 'BOUD02000293.1', 'BOUD02000146.1', 'BOUD02000161.1', 'BOUD02000189.1', 'BOUD02000199.1', 'BOUD02000384.1', 'BOUD02000198.1', 'BOUD02000312.1', 'BOUD02000320.1', 'BOUD02000491.1', 'B…	27
C00000000017_linkage_scaffold_17	['BOUD02000150.1', 'BOUD02000134.1', 'BOUD02000243.1', 'BOUD02000547.1', 'BOUD02000118.1', 'BOUD02000120.1', 'BOUD02000147.1', 'BOUD02000144.1', 'BOUD02000138.1', 'BOUD02000456.1', 'BOUD02000081.1', 'BOUD02000042.1', 'BOUD02000014.1', 'BOUD02000050.1', 'BOUD02000059.1_2', 'BOUD02000045.1_2', 'BOUD02000254.1', 'BOUD02000228.1']	18
C00000000018_linkage_scaffold_18	['BOUD02000284.1', 'BOUD02000188.1', 'BOUD02000274.1', 'BOUD02000056.1_1', 'BOUD02000287.1', 'BOUD02000409.1', 'BOUD02000444.1', 'BOUD02000494.1', 'BOUD02000100.1', 'BOUD02000471.1', 'BOUD02000411.1', 'BOUD02000225.1_2', 'BOUD02000565.1', 'BOUD02000242.1', 'BOUD02000310.1', 'BOUD02000089.1', 'BOUD02000121.1', 'BOUD02000112.1', 'BOUD02000170.1', 'BOUD02000245.1', 'BOUD02000037.1', 'BOUD02000097.1'…	30
C00000000019_linkage_scaffold_19	['BOUD02000386.1', 'BOUD02000556.1', 'BOUD02000021.1', 'BOUD02000305.1', 'BOUD02000162.1', 'BOUD02000030.1', 'BOUD02000416.1', 'BOUD02000029.1', 'BOUD02000401.1', 'BOUD02000387.1', 'BOUD02000183.1', 'BOUD02000196.1', 'BOUD02000116.1', 'BOUD02000253.1', 'BOUD02000207.1', 'BOUD02000250.1', 'BOUD02000246.1', 'BOUD02000202.1']	18
C0000000001_linkage_scaffold_1	['BOUD02000076.1', 'BOUD02000347.1', 'BOUD02000160.1', 'BOUD02000301.1', 'BOUD02000169.1', 'BOUD02000311.1', 'BOUD02000117.1', 'BOUD02000077.1', 'BOUD02000205.1', 'BOUD02000111.1', 'BOUD02000095.1', 'BOUD02000026.1', 'BOUD02000546.1', 'BOUD02000261.1', 'BOUD02000054.1', 'BOUD02000229.1', 'BOUD02000048.1_2', 'BOUD02000363.1', 'BOUD02000536.1', 'BOUD02000033.1', 'BOUD02000104.1', 'BOUD02000031.1']	22
C00000000020_linkage_scaffold_20	['BOUD02000177.1', 'BOUD02000135.1', 'BOUD02000438.1', 'BOUD02000084.1', 'BOUD02000119.1', 'BOUD02000469.1', 'BOUD02000508.1', 'BOUD02000173.1', 'BOUD02000178.1', 'BOUD02000140.1', 'BOUD02000083.1', 'BOUD02000451.1', 'BOUD02000008.1', 'BOUD02000226.1', 'BOUD02000306.1', 'BOUD02000511.1']	16
C00000000021_linkage_scaffold_21	['BOUD02000131.1', 'BOUD02000096.1', 'BOUD02000107.1_2', 'BOUD02000222.1', 'BOUD02000006.1', 'BOUD02000195.1', 'BOUD02000036.1', 'BOUD02000446.1']	8
C00000000022_linkage_scaffold_22	['BOUD02000047.1', 'BOUD02000011.1', 'BOUD02000049.1', 'BOUD02000194.1']	4
C00000000023_linkage_scaffold_23	['BOUD02000034.1', 'BOUD02000073.1', 'BOUD02000043.1', 'BOUD02000041.1', 'BOUD02000070.1', 'BOUD02000087.1', 'BOUD02000268.1', 'BOUD02000057.1', 'BOUD02000353.1', 'BOUD02000475.1', 'BOUD02000525.1', 'BOUD02000264.1', 'BOUD02000233.1', 'BOUD02000204.1', 'BOUD02000213.1', 'BOUD02000103.1', 'BOUD02000149.1']	17
C00000000024_linkage_scaffold_24	['BOUD02000181.1', 'BOUD02000260.1', 'BOUD02000201.1', 'BOUD02000010.1', 'BOUD02000063.1', 'BOUD02000123.1', 'BOUD02000126.1', 'BOUD02000292.1', 'BOUD02000062.1', 'BOUD02000314.1', 'BOUD02000410.1', 'BOUD02000323.1', 'BOUD02000182.1', 'BOUD02000453.1', 'BOUD02000166.1', 'BOUD02000048.1_1', 'BOUD02000236.1']	17
C0000000002_linkage_scaffold_2	['BOUD02000067.1', 'BOUD02000275.1', 'BOUD02000252.1', 'BOUD02000032.1', 'BOUD02000094.1', 'BOUD02000113.1', 'BOUD02000397.1', 'BOUD02000035.1', 'BOUD02000093.1', 'BOUD02000132.1', 'BOUD02000069.1']	11
C0000000003_linkage_scaffold_3	['BOUD02000304.1', 'BOUD02000532.1', 'BOUD02000130.1', 'BOUD02000115.1', 'BOUD02000239.1', 'BOUD02000370.1', 'BOUD02000167.1', 'BOUD02000468.1', 'BOUD02000486.1', 'BOUD02000102.1', 'BOUD02000176.1', 'BOUD02000543.1', 'BOUD02000066.1', 'BOUD02000086.1', 'BOUD02000003.1', 'BOUD02000045.1_1', 'BOUD02000280.1', 'BOUD02000365.1', 'BOUD02000439.1', 'BOUD02000139.1', 'BOUD02000158.1', 'BOUD02000291.1', …	25
C0000000004_linkage_scaffold_4	['BOUD02000404.1', 'BOUD02000289.1', 'BOUD02000024.1', 'BOUD02000247.1', 'BOUD02000395.1', 'BOUD02000389.1', 'BOUD02000298.1', 'BOUD02000441.1', 'BOUD02000317.1', 'BOUD02000013.1', 'BOUD02000064.1', 'BOUD02000223.1', 'BOUD02000510.1', 'BOUD02000075.1', 'BOUD02000127.1', 'BOUD02000574.1', 'BOUD02000151.1', 'BOUD02000484.1', 'BOUD02000090.1', 'BOUD02000175.1', 'BOUD02000575.1', 'BOUD02000571.1']	22
C0000000005_linkage_scaffold_5	['BOUD02000319.1', 'BOUD02000002.1', 'BOUD02000068.1', 'BOUD02000285.1', 'BOUD02000091.1_2', 'BOUD02000303.1', 'BOUD02000424.1', 'BOUD02000454.1', 'BOUD02000568.1', 'BOUD02000479.1', 'BOUD02000197.1', 'BOUD02000248.1', 'BOUD02000309.1', 'BOUD02000174.1']	14
C0000000006_linkage_scaffold_6	['BOUD02000286.1', 'BOUD02000190.1', 'BOUD02000500.1', 'BOUD02000459.1', 'BOUD02000234.1', 'BOUD02000271.1', 'BOUD02000001.1', 'BOUD02000091.1_1', 'BOUD02000136.1', 'BOUD02000155.1', 'BOUD02000552.1', 'BOUD02000462.1', 'BOUD02000179.1', 'BOUD02000163.1', 'BOUD02000519.1']	15
C0000000007_linkage_scaffold_7	['BOUD02000488.1', 'BOUD02000214.1', 'BOUD02000044.1', 'BOUD02000220.1', 'BOUD02000398.1', 'BOUD02000435.1', 'BOUD02000429.1', 'BOUD02000259.1', 'BOUD02000437.1', 'BOUD02000427.1', 'BOUD02000372.1', 'BOUD02000016.1', 'BOUD02000028.1', 'BOUD02000060.1', 'BOUD02000165.1', 'BOUD02000159.1', 'BOUD02000080.1', 'BOUD02000501.1', 'BOUD02000423.1', 'BOUD02000072.1', 'BOUD02000290.1', 'BOUD02000105.1', 'B…	28
C0000000008_linkage_scaffold_8	['BOUD02000098.1', 'BOUD02000572.1', 'BOUD02000023.1', 'BOUD02000542.1', 'BOUD02000020.1', 'BOUD02000092.1', 'BOUD02000282.1', 'BOUD02000343.1', 'BOUD02000056.1_2']	9
C0000000009_linkage_scaffold_9	['BOUD02000133.1', 'BOUD02000209.1', 'BOUD02000277.1', 'BOUD02000231.1', 'BOUD02000219.1', 'BOUD02000206.1', 'BOUD02000505.1', 'BOUD02000203.1', 'BOUD02000106.1', 'BOUD02000249.1', 'BOUD02000345.1', 'BOUD02000580.1', 'BOUD02000079.1', 'BOUD02000412.1', 'BOUD02000108.1', 'BOUD02000521.1', 'BOUD02000430.1', 'BOUD02000009.1', 'BOUD02000137.1', 'BOUD02000145.1', 'BOUD02000148.1', 'BOUD02000180.1', 'B…	45
