# Supplementary material for: Genome Refinement in Pacific Bluefin Tuna (Thunnus orientalis): Chromosome-level Assembly Using Hybrid Linkage Data
Source: Research Square preprint supplement (doi:10.21203/rs.3.rs-7883235/v1), 2025-11-04
Supplement: Supplementary file 4 [file ff811c1d6c5f8562f5f8f6e1.xlsx]

## Sheet: Sheet1
Biological Process (BP); Molecular Function (MF); Cellular Component (CC)
GO_list	n_genes	namespace
GO:0016020	3042	CC
GO:0005515	2713	MF
GO:0005634	2404	CC
GO:0005737	2130	CC
GO:0005886	2068	CC
GO:0006357	1140	BP
GO:0005524	1033	MF
GO:0000981	908	MF
GO:0003677	813	MF
GO:0000978	792	MF
GO:0007186	712	BP
GO:0005615	696	CC
GO:0006355	677	BP
GO:0005829	672	CC
GO:0004930	618	MF
GO:0006468	590	BP
GO:0005739	562	CC
GO:0004672	562	MF
GO:0003723	560	MF
GO:0008270	529	MF
GO:0055085	525	BP
GO:0003676	495	MF
GO:0005509	481	MF
GO:0007165	470	BP
GO:0003700	468	MF
GO:0005525	434	MF
GO:0006508	412	BP
GO:0005576	383	CC
GO:0003924	320	MF
GO:0004674	309	MF
GO:0005783	298	CC
GO:0009897	283	CC
GO:0006955	255	BP
GO:0022857	242	MF
GO:0005789	242	CC
GO:0035556	237	BP
GO:0045944	234	BP
GO:0043565	215	MF
GO:0005794	212	CC
GO:0016887	205	MF
GO:0046983	199	MF
GO:0006811	196	BP
GO:0005085	193	MF
GO:0016491	191	MF
GO:0030154	186	BP
GO:0051015	184	MF
GO:0004252	182	MF
GO:0003824	181	MF
GO:0061630	180	MF
GO:0005096	179	MF
GO:0008017	174	MF
GO:0005216	171	MF
GO:0007155	167	BP
GO:0000977	163	MF
GO:0016567	155	BP
GO:0046872	151	MF
GO:0098609	149	BP
GO:0000785	147	CC
GO:0007275	147	BP
GO:0003735	143	MF
GO:0000122	143	BP
GO:0003779	140	MF
GO:0005102	139	MF
GO:0003729	138	MF
GO:0005654	136	CC
GO:0031012	136	CC
GO:0005975	135	BP
GO:0062023	135	unknown
GO:0016477	134	BP
GO:0006886	132	BP
GO:0043231	132	CC
GO:0006412	129	BP
GO:0016192	128	BP
GO:0046982	127	MF
GO:0016787	126	MF
GO:0005667	126	CC
GO:0007200	125	BP
GO:0005730	125	CC
GO:0020037	124	MF
GO:0006470	121	BP
GO:0000139	121	CC
GO:0043005	120	CC
GO:0031267	117	MF
GO:0007411	117	BP
GO:0004222	115	MF
GO:0008237	114	MF
GO:0006813	114	BP
GO:0010468	114	BP
GO:0003682	113	MF
GO:0005506	113	MF
GO:0004888	112	MF
GO:0004842	111	MF
GO:0004713	111	MF
GO:0043235	110	CC
GO:0008083	110	MF
GO:0005198	109	MF
GO:0007166	109	BP
GO:0005840	108	CC
GO:0030527	108	MF
GO:0030425	106	CC
GO:0003714	105	MF
GO:0000786	105	CC
GO:0007156	105	BP
GO:0045202	104	CC
GO:0071805	103	BP
GO:0038023	102	MF
GO:0008289	101	MF
GO:0000166	100	MF
GO:0003713	99	MF
GO:0006511	98	BP
GO:0005856	98	CC
GO:0019901	95	MF
GO:0009986	93	CC
GO:0006457	93	BP
GO:0005813	93	CC
GO:0060271	92	BP
GO:0015629	92	CC
GO:0045892	91	BP
GO:0007204	90	BP
GO:0006281	90	BP
GO:0007601	88	BP
GO:0030182	87	BP
GO:0007264	87	BP
GO:0030198	87	BP
GO:0005912	86	CC
GO:0006629	86	BP
GO:0051082	85	MF
GO:0005125	85	MF
GO:0005743	85	CC
GO:0030036	85	BP
GO:0035091	84	MF
GO:0007018	84	BP
GO:0016757	84	MF
GO:0035025	83	BP
GO:0042981	83	BP
GO:0003712	83	MF
GO:0008076	82	CC
GO:0007015	82	BP
GO:0030424	81	CC
GO:0007189	80	BP
GO:0043161	80	BP
GO:0004843	80	MF
GO:0005923	80	CC
GO:0000287	79	MF
GO:0000398	79	BP
GO:0005249	78	MF
GO:0005768	77	CC
GO:0042393	76	MF
GO:0005179	76	MF
GO:0045893	76	BP
GO:0006486	76	BP
GO:0016324	74	CC
GO:0005874	73	CC
GO:0007169	72	BP
GO:0016579	70	BP
GO:0035725	70	BP
GO:0016323	70	CC
GO:0012505	70	CC
GO:0005178	70	MF
GO:0016705	70	MF
GO:0000149	69	MF
GO:0015031	69	BP
GO:0005765	69	CC
GO:0005802	69	CC
GO:0005764	68	CC
GO:0008081	68	MF
GO:0006888	67	BP
GO:0045211	67	CC
GO:0018105	66	BP
GO:0051260	66	BP
GO:0006338	66	BP
GO:0000226	65	BP
GO:0004497	65	MF
GO:0005925	64	CC
GO:0006954	64	BP
GO:0016311	63	BP
GO:0007154	63	BP
GO:0006897	62	BP
GO:0019722	62	BP
GO:0007267	61	BP
GO:0007420	61	BP
GO:0007268	60	BP
GO:0060070	59	BP
GO:0006887	59	BP
GO:0008146	59	MF
GO:0008168	59	MF
GO:0046854	59	BP
GO:0050852	58	BP
GO:0043087	58	BP
GO:0005543	58	MF
GO:0036064	58	CC
GO:0001228	58	MF
GO:0043066	58	BP
GO:0070588	57	BP
GO:0001817	57	BP
GO:0014069	57	CC
GO:0031410	57	CC
GO:0004725	56	MF
GO:0005200	56	MF
GO:0007596	56	BP
GO:0016459	56	CC
GO:1902600	55	BP
GO:0005769	55	CC
GO:0006351	55	BP
GO:0045296	54	MF
GO:0034220	54	BP
GO:0019221	54	BP
GO:0060326	54	BP
GO:0007218	54	BP
GO:0006631	53	BP
GO:0043410	53	BP
GO:0008009	53	MF
GO:0006865	53	BP
GO:0005516	53	MF
GO:0016301	52	MF
GO:0016746	52	MF
GO:0030335	52	BP
GO:0005212	52	MF
GO:0016493	52	MF
GO:0006869	52	BP
GO:0042277	51	MF
GO:0007160	51	BP
GO:0016791	51	MF
GO:0009653	51	BP
GO:0003697	51	MF
GO:0007399	51	BP
GO:0030170	51	MF
GO:0043547	51	BP
GO:0030672	51	CC
GO:0006396	51	BP
GO:0000209	51	BP
GO:0043025	51	CC
GO:0005230	51	MF
GO:0019957	51	MF
GO:0006493	50	BP
GO:0030018	50	CC
GO:0008013	50	MF
GO:0051726	50	BP
GO:0004867	49	MF
GO:0005741	49	CC
GO:0009966	49	BP
GO:0001664	49	MF
GO:0002088	48	BP
GO:0008134	48	MF
GO:0000976	48	MF
GO:0016616	48	MF
GO:0006606	47	BP
GO:0018107	47	BP
GO:0005544	47	MF
GO:0007507	47	BP
GO:0044325	47	MF
GO:0031175	47	BP
GO:0007188	47	BP
GO:0003777	46	MF
GO:0031201	46	CC
GO:0005215	46	MF
GO:0050660	46	MF
GO:0005929	46	CC
GO:0009058	46	BP
GO:0071222	46	BP
GO:0005922	45	CC
GO:0007417	45	BP
GO:0008234	45	MF
GO:0004896	45	MF
GO:0006816	45	BP
GO:0140359	45	MF
GO:0001508	44	BP
GO:1990573	44	BP
GO:0006812	44	BP
GO:0000146	44	MF
GO:0006915	44	BP
GO:0005243	44	MF
GO:0030246	44	MF
GO:0003774	44	MF
GO:0016460	43	CC
GO:0000724	43	BP
GO:0000902	43	BP
GO:0030276	43	MF
GO:0042102	42	BP
GO:0007010	42	BP
GO:0015267	42	MF
GO:0003755	42	MF
GO:0007229	42	BP
GO:0048856	42	BP
GO:0006874	42	BP
GO:0043130	41	MF
GO:0005911	41	CC
GO:0006364	41	BP
GO:0042130	41	BP
GO:0031295	41	BP
GO:0071526	41	BP
GO:0005770	41	CC
GO:0072659	41	BP
GO:0003743	41	MF
GO:0005777	40	CC
GO:0005262	40	MF
GO:0001755	40	BP
GO:0042383	40	CC
GO:0005815	40	CC
GO:0004879	40	MF
GO:0005834	39	CC
GO:0036503	39	BP
GO:0008021	39	CC
GO:0098978	39	CC
GO:0006260	39	BP
GO:0006334	38	BP
GO:0007030	38	BP
GO:0043123	38	BP
GO:0090630	38	BP
GO:0070062	38	CC
GO:0004722	38	MF
GO:0031122	38	BP
GO:0043065	38	BP
GO:0001786	37	MF
GO:0042147	37	BP
GO:0000049	37	MF
GO:0016758	37	MF
GO:0016055	37	BP
GO:0051087	37	MF
GO:0005930	37	CC
GO:0004984	37	MF
GO:0071705	37	BP
GO:0005814	37	CC
GO:0030001	36	BP
GO:0005747	36	unknown
GO:0016342	36	CC
GO:0007219	36	BP
GO:0033674	36	BP
GO:0005635	36	CC
GO:0008528	36	MF
GO:0004601	36	MF
GO:0006974	36	BP
GO:0005884	36	CC
GO:0098742	36	BP
GO:0004386	35	MF
GO:0032040	35	CC
GO:0016197	35	BP
GO:0017147	35	MF
GO:0007017	35	BP
GO:0000278	35	BP
GO:0004812	35	MF
GO:0005759	35	CC
GO:0071013	35	CC
GO:0006814	35	BP
GO:0046856	35	BP
GO:0045499	34	MF
GO:0009887	34	BP
GO:0090090	34	BP
GO:0001525	34	BP
GO:0008284	34	BP
GO:0019005	34	CC
GO:0004714	34	MF
GO:0006096	34	BP
GO:0003690	34	MF
GO:0042626	34	MF
GO:0045165	34	BP
GO:0005251	34	MF
GO:0016747	34	MF
GO:0060090	34	MF
GO:0003725	34	MF
GO:0005484	34	MF
GO:0008194	34	MF
GO:0015179	34	MF
GO:0016592	33	CC
GO:0022625	33	CC
GO:0032870	33	BP
GO:0033627	33	BP
GO:0007266	33	BP
GO:0009790	33	BP
GO:0005622	33	CC
GO:0007224	33	BP
GO:0001725	32	CC
GO:0005267	32	MF
GO:0006935	32	BP
GO:0005261	32	MF
GO:0048013	32	BP
GO:0006979	32	BP
GO:0008201	32	MF
GO:0005762	32	CC
GO:0070374	32	BP
GO:0030215	32	MF
GO:0001227	32	MF
GO:0004114	32	MF
GO:0005681	32	CC
GO:0006644	32	BP
GO:0005184	31	MF
GO:0016485	31	BP
GO:0000045	31	BP
GO:0071880	31	BP
GO:0006487	31	BP
GO:0000932	31	CC
GO:0008305	31	CC
GO:0003950	31	MF
GO:0050911	31	BP
GO:0005549	31	MF
GO:0031625	31	MF
GO:0004553	31	MF
GO:0030027	30	CC
GO:0005201	30	MF
GO:0043409	30	BP
GO:0044331	30	BP
GO:0007043	30	BP
GO:0050839	30	MF
GO:0006906	30	BP
GO:0015485	30	MF
GO:0034332	30	BP
GO:0007265	30	BP
GO:0003730	30	MF
GO:0015630	30	CC
GO:0003333	30	BP
GO:0006418	30	BP
GO:0016339	30	BP
GO:0015631	30	MF
GO:0000776	29	CC
GO:0016409	29	MF
GO:0005778	29	CC
GO:0009755	29	BP
GO:0045121	29	CC
GO:0007409	29	BP
GO:0006810	29	BP
GO:0042744	29	BP
GO:0007179	29	BP
GO:0005882	29	CC
GO:0006397	29	BP
GO:0140662	29	MF
GO:0051536	29	MF
GO:0006368	29	BP
GO:0051287	29	MF
GO:0008236	29	MF
GO:0016042	29	BP
GO:0005811	28	CC
GO:0031683	28	MF
GO:0051603	28	BP
GO:0005938	28	CC
GO:0071011	28	CC
GO:0019001	28	MF
GO:0042157	28	BP
GO:0042127	28	BP
GO:0072562	28	CC
GO:0005242	28	MF
GO:0046488	28	BP
GO:0005942	28	CC
GO:0030574	28	BP
GO:0008360	28	BP
GO:0030334	27	BP
GO:0051607	27	BP
GO:0046332	27	MF
GO:1902476	27	BP
GO:0030514	27	BP
GO:0048015	27	BP
GO:0005507	27	MF
GO:0019825	27	MF
GO:0005245	27	MF
GO:0006302	27	BP
GO:0043022	27	MF
GO:0016627	27	MF
GO:0098839	27	CC
GO:0015175	27	MF
GO:0009888	27	BP
GO:0009190	27	BP
GO:0008233	27	MF
GO:0006936	27	BP
GO:0006890	27	BP
GO:0051959	27	MF
GO:0031982	27	CC
GO:0007059	27	BP
GO:0019888	26	MF
GO:0008333	26	BP
GO:0004197	26	MF
GO:0046513	26	BP
GO:0000922	26	CC
GO:0030864	26	CC
GO:0045505	26	MF
GO:0005891	26	CC
GO:0050919	26	BP
GO:0006367	26	BP
GO:0034765	26	BP
GO:0061564	26	BP
GO:0030971	26	MF
GO:0000151	25	CC
GO:0042923	25	MF
GO:0005546	25	MF
GO:0048471	25	CC
GO:0070507	25	BP
GO:0000413	25	BP
GO:0036211	25	BP
GO:0015293	25	MF
GO:0030833	25	BP
GO:0007005	25	BP
GO:0001708	25	BP
GO:0005109	25	MF
GO:0051480	25	BP
GO:0004721	25	MF
GO:0004623	25	MF
GO:0004521	25	MF
GO:0051017	25	BP
GO:0055037	25	CC
GO:0030674	25	MF
GO:0006139	25	BP
GO:0003684	25	MF
GO:0004016	24	MF
GO:0045028	24	MF
GO:0008277	24	BP
GO:0030866	24	BP
GO:0016605	24	CC
GO:0004993	24	MF
GO:0032502	24	BP
GO:0070493	24	BP
GO:0031519	24	CC
GO:0016620	24	MF
GO:0051453	24	BP
GO:0048812	24	BP
GO:0043197	24	CC
GO:0032456	24	BP
GO:0003746	24	MF
GO:0032934	24	MF
GO:0016702	24	MF
GO:0015057	24	MF
GO:0005643	24	CC
GO:0045214	24	BP
GO:0042054	24	MF
GO:0046961	24	MF
GO:0098655	24	BP
GO:0045332	24	BP
GO:0000281	24	BP
GO:0090575	24	CC
GO:0010951	23	BP
GO:0015671	23	BP
GO:0035591	23	MF
GO:1905515	23	BP
GO:0071949	23	MF
GO:0030145	23	MF
GO:0009952	23	BP
GO:0022848	23	MF
GO:0070888	23	MF
GO:0008033	23	BP
GO:0015271	23	MF
GO:0055088	23	BP
GO:0022008	23	BP
GO:0015459	23	MF
GO:0006635	23	BP
GO:0006413	23	BP
GO:0005694	23	CC
GO:0031032	23	BP
GO:0030968	23	BP
GO:0019905	23	MF
GO:0052742	23	MF
GO:0006182	22	BP
GO:0008374	22	MF
GO:0006352	22	BP
GO:0070006	22	MF
GO:0009898	22	CC
GO:0006506	22	BP
GO:0031838	22	CC
GO:0002430	22	BP
GO:0046935	22	MF
GO:0008188	22	MF
GO:0050661	22	MF
GO:0008203	22	BP
GO:0004875	22	MF
GO:0032543	22	BP
GO:0030054	22	CC
GO:0006099	22	BP
GO:0042734	22	CC
GO:0042026	22	BP
GO:0045109	22	BP
GO:0006612	22	BP
GO:0030488	22	BP
GO:0052689	22	MF
GO:0032982	22	CC
GO:0031720	22	MF
GO:0032922	22	BP
GO:0070382	22	CC
GO:1990904	22	CC
GO:0031490	22	MF
GO:0098703	22	BP
GO:0005833	22	CC
GO:0005313	22	MF
GO:0035567	22	BP
GO:0032190	22	MF
GO:0004435	22	MF
GO:0051016	22	BP
GO:0005839	22	CC
GO:0005164	22	MF
GO:0015914	22	BP
GO:0005344	22	MF
GO:0043195	22	CC
GO:0007339	22	BP
GO:0007423	22	BP
GO:0043177	22	MF
GO:0031966	21	CC
GO:0030148	21	BP
GO:0030509	21	BP
GO:0051209	21	BP
GO:0015250	21	MF
GO:0035023	21	BP
GO:0042761	21	BP
GO:0019432	21	BP
GO:0010494	21	CC
GO:0032588	21	CC
GO:0009408	21	BP
GO:0048306	21	MF
GO:0003724	21	MF
GO:0008373	21	MF
GO:0003341	21	BP
GO:0006919	21	unknown
GO:0007157	21	BP
GO:0015986	21	BP
GO:0032281	21	CC
GO:0006289	21	BP
GO:0019894	21	MF
GO:1990837	21	MF
GO:0006414	21	BP
GO:0035064	21	unknown
GO:0008195	21	MF
GO:0008286	21	BP
GO:0031146	21	BP
GO:0006833	21	BP
GO:0006406	21	BP
GO:0006805	21	BP
GO:0000723	21	BP
GO:0030041	20	BP
GO:0016712	20	MF
GO:0005254	20	MF
GO:0006952	20	BP
GO:0004181	20	MF
GO:0006310	20	BP
GO:0016251	20	MF
GO:0042802	20	MF
GO:0010506	20	BP
GO:0007034	20	BP
GO:0045087	20	BP
GO:0022841	20	MF
GO:0030139	20	CC
GO:0031594	20	CC
GO:0005758	20	CC
GO:0006898	20	BP
GO:0007605	20	BP
GO:0043484	20	BP
GO:0042771	20	BP
GO:0031902	20	CC
GO:0006879	20	BP
GO:0015297	20	MF
GO:0004950	20	MF
GO:0008092	20	MF
GO:0042800	20	MF
GO:0030322	20	BP
GO:0060048	20	BP
GO:0001764	20	BP
GO:0003899	20	MF
GO:0004866	19	MF
GO:0051537	19	MF
GO:0048513	19	BP
GO:0007178	19	BP
GO:0043495	19	MF
GO:0005881	19	CC
GO:0048268	19	BP
GO:0000381	19	BP
GO:0030178	19	BP
GO:0015078	19	MF
GO:0015813	19	BP
GO:0017124	19	MF
GO:0042391	19	BP
GO:0030544	19	MF
GO:0006749	19	BP
GO:0036297	19	BP
GO:0051897	19	BP
GO:0007020	19	BP
GO:0016790	19	MF
GO:0048278	19	BP
GO:0045277	19	CC
GO:0006123	19	BP
GO:0098632	19	MF
GO:0071363	19	BP
GO:0032012	19	BP
GO:0032981	19	BP
GO:0042995	19	CC
GO:0005793	19	CC
GO:0000118	19	CC
GO:0022627	19	CC
GO:0006956	19	BP
GO:0006637	18	BP
GO:0140326	18	MF
GO:0004653	18	MF
GO:0017046	18	MF
GO:0042803	18	MF
GO:0000175	18	MF
GO:0004675	18	MF
GO:0030136	18	CC
GO:0004467	18	MF
GO:0017056	18	MF
GO:0005540	18	MF
GO:0072686	18	CC
GO:0008285	18	BP
GO:0032956	18	BP
GO:0008173	18	MF
GO:0030020	18	MF
GO:0046914	18	MF
GO:0016788	18	MF
GO:0005868	18	CC
GO:0005669	18	CC
GO:0044255	18	unknown
GO:0005861	18	CC
GO:1901981	18	MF
GO:0045335	18	CC
GO:0007052	18	BP
GO:0035861	18	CC
GO:0032266	18	MF
GO:0008757	18	MF
GO:0006325	18	BP
GO:0005246	18	MF
GO:0000407	18	CC
GO:1901379	18	BP
GO:0005332	18	MF
GO:0030374	18	unknown
GO:0006820	18	BP
GO:0046777	18	BP
GO:0007168	18	BP
GO:0030150	18	BP
GO:0006891	18	BP
GO:0008483	18	MF
GO:0000422	18	BP
GO:0035869	18	CC
GO:0046873	18	MF
GO:0045197	18	BP
GO:0019838	17	MF
GO:0000030	17	MF
GO:0030141	17	CC
GO:0004620	17	MF
GO:0061709	17	BP
GO:0005680	17	CC
GO:0055056	17	MF
GO:0030286	17	CC
GO:0030838	17	BP
GO:0003678	17	MF
GO:0006270	17	BP
GO:0044877	17	MF
GO:0000462	17	BP
GO:0015935	17	CC
GO:0005319	17	MF
GO:0017156	17	BP
GO:0019829	17	MF
GO:0016538	17	MF
GO:0032508	17	unknown
GO:0035102	17	CC
GO:0051085	17	unknown
GO:0051225	17	BP
GO:0006006	17	BP
GO:0015248	17	unknown
GO:0006366	17	BP
GO:0080008	17	CC
GO:0016740	17	MF
GO:0002181	17	BP
GO:0070527	17	BP
GO:0032587	17	CC
GO:1990404	17	MF
GO:0001671	17	MF
GO:0042813	16	MF
GO:0048488	16	BP
GO:0031491	16	MF
GO:0033344	16	BP
GO:0042632	16	BP
GO:0006082	16	BP
GO:0000145	16	CC
GO:0048791	16	BP
GO:0090307	16	BP
GO:0003009	16	BP
GO:0048870	16	BP
GO:0034446	16	BP
GO:0048704	16	BP
GO:0034727	16	BP
GO:0120020	16	MF
GO:0008253	16	MF
GO:0042289	16	MF
GO:0000987	16	MF
GO:0004693	16	MF
GO:0010008	16	CC
GO:0019843	16	MF
GO:0042254	16	BP
GO:0008654	16	BP
GO:0005666	16	CC
GO:0005126	16	MF
GO:0046875	16	MF
GO:0004364	16	MF
GO:0005604	16	CC
GO:0051056	16	BP
GO:0050801	16	BP
GO:0007346	16	BP
GO:0046323	16	BP
GO:0007283	16	BP
GO:0042162	16	MF
GO:0047617	16	MF
GO:0048188	16	CC
GO:0005452	16	MF
GO:0030134	16	CC
GO:0007009	16	BP
GO:0006826	16	BP
GO:0015718	16	BP
GO:0015749	16	BP
GO:0003887	16	MF
GO:0032436	16	BP
GO:0008028	16	MF
GO:0008023	16	CC
GO:0016773	16	MF
GO:0043113	16	BP
GO:0070837	16	BP
GO:0005763	16	CC
GO:0012506	16	CC
GO:0031593	16	MF
GO:0031623	16	BP
GO:0046907	16	BP
GO:0001518	16	CC
GO:0006520	16	BP
GO:0004383	16	MF
GO:0015149	16	MF
GO:0051539	16	MF
GO:0008630	15	BP
GO:0006120	15	BP
GO:0016208	15	MF
GO:0016281	15	CC
GO:0005005	15	MF
GO:0090263	15	BP
GO:0097320	15	BP
GO:0034451	15	CC
GO:0016410	15	MF
GO:0043406	15	BP
GO:0006164	15	BP
GO:0006094	15	BP
GO:0031507	15	BP
GO:0004622	15	MF
GO:0033617	15	BP
GO:0005788	15	CC
GO:0017017	15	MF
GO:0005774	15	CC
GO:0003707	15	MF
GO:0016810	15	MF
GO:0008610	15	BP
GO:0005876	15	CC
GO:0016581	15	CC
GO:0031681	15	MF
GO:0031297	15	BP
GO:0005518	15	MF
GO:0048193	15	BP
GO:0005385	15	MF
GO:0015701	15	BP
GO:0005523	15	MF
GO:0006623	15	BP
GO:0000164	15	CC
GO:0000159	15	CC
GO:0035723	15	BP
GO:0001501	15	BP
GO:0008198	15	MF
GO:0006605	15	BP
GO:0030553	15	MF
GO:0007623	15	BP
GO:0008080	15	MF
GO:0070411	15	MF
GO:0008104	15	BP
GO:0006298	15	BP
GO:0004518	15	MF
GO:0042110	15	BP
GO:0140110	15	MF
GO:0035335	15	BP
GO:0019752	15	BP
GO:0000124	15	CC
GO:0008157	15	MF
GO:0022829	15	MF
GO:0006303	15	BP
GO:0000123	15	CC
GO:0045504	15	MF
GO:0004198	15	MF
GO:0001836	15	BP
GO:0072583	15	BP
GO:0035255	15	MF
GO:0030496	15	CC
GO:0001676	15	BP
GO:0046839	15	BP
GO:0030199	15	BP
GO:1904263	15	BP
GO:0030166	15	BP
GO:0007098	15	BP
GO:0042273	15	BP
GO:2000311	15	BP
GO:0035267	15	CC
GO:0019882	15	BP
GO:0005771	14	CC
GO:0016925	14	BP
GO:0140289	14	unknown
GO:0019911	14	MF
GO:0006469	14	BP
GO:0000813	14	CC
GO:0005819	14	CC
GO:0005776	14	CC
GO:0001503	14	BP
GO:0017022	14	MF
GO:0030687	14	CC
GO:0035269	14	BP
GO:0070971	14	CC
GO:0030594	14	MF
GO:0003756	14	MF
GO:0032482	14	BP
GO:0006900	14	BP
GO:0006914	14	BP
GO:0006893	14	BP
GO:0007032	14	BP
GO:0006821	14	BP
GO:0051965	14	BP
GO:0043524	14	BP
GO:0046540	14	CC
GO:0000062	14	MF
GO:0005496	14	MF
GO:0015026	14	MF
GO:0004869	14	MF
GO:0001666	14	BP
GO:1990782	14	MF
GO:0005520	14	MF
GO:0050321	14	MF
GO:0097602	14	MF
GO:0042073	14	BP
GO:0004407	14	MF
GO:0000775	14	CC
GO:0006400	14	BP
GO:0008154	14	BP
GO:0016310	14	BP
GO:0004707	14	MF
GO:0008324	14	MF
GO:0006284	14	BP
GO:0031418	14	MF
GO:0008970	14	MF
GO:0006261	14	BP
GO:0042730	14	BP
GO:0045597	14	BP
GO:0070292	14	BP
GO:0005901	14	CC
GO:0051011	14	MF
GO:0008375	14	MF
GO:0045727	14	BP
GO:0008380	14	BP
GO:0045454	14	BP
GO:0045104	14	BP
GO:0070936	14	BP
GO:0000993	14	MF
GO:0009311	14	BP
GO:0042826	14	MF
GO:0030121	13	CC
GO:2000344	13	BP
GO:0007187	13	BP
GO:0000077	13	BP
GO:0000712	13	BP
GO:0009055	13	MF
GO:0097038	13	CC
GO:0016651	13	MF
GO:0031145	13	BP
GO:0005577	13	CC
GO:0043679	13	CC
GO:0030593	13	BP
GO:0001540	13	MF
GO:0031209	13	CC
GO:0090385	13	BP
GO:0006909	13	BP
GO:0043171	13	BP
GO:0035803	13	BP
GO:0047496	13	BP
GO:0051092	13	BP
GO:0030311	13	BP
GO:0042554	13	BP
GO:0032007	13	BP
GO:0016226	13	BP
GO:0004143	13	MF
GO:0016185	13	BP
GO:0051156	13	BP
GO:0000387	13	BP
GO:0001726	13	CC
GO:0097192	13	BP
GO:0043539	13	MF
GO:0070915	13	MF
GO:0031901	13	CC
GO:0042742	13	BP
GO:0007097	13	BP
GO:0034440	13	BP
GO:0005324	13	MF
GO:0000184	13	BP
GO:0001522	13	BP
GO:0007131	13	BP
GO:0015501	13	MF
GO:0030031	13	BP
GO:0051301	13	BP
GO:0008093	13	MF
GO:0005979	13	BP
GO:0003727	13	MF
GO:0032968	13	BP
GO:0042613	13	CC
GO:0034116	13	BP
GO:0012501	13	BP
GO:0016780	13	MF
GO:0031398	13	BP
GO:0050840	13	MF
GO:0048468	13	BP
GO:2001069	13	MF
GO:0031514	13	CC
GO:0044782	13	BP
GO:0009617	13	BP
GO:0010001	13	BP
GO:0005902	13	CC
GO:0030837	13	BP
GO:0045766	13	BP
GO:0031463	13	CC
GO:0004709	13	MF
GO:0006491	13	BP
GO:0032580	13	CC
GO:0072377	13	BP
GO:0070403	13	MF
GO:0005736	13	CC
GO:0004402	13	MF
GO:0018230	13	BP
GO:0034237	13	MF
GO:0031210	13	MF
GO:0035371	13	CC
GO:0034314	13	BP
GO:0007019	12	BP
GO:0070577	12	unknown
GO:0055038	12	CC
GO:0009267	12	BP
GO:0048010	12	BP
GO:0002161	12	MF
GO:0034625	12	BP
GO:0008278	12	CC
GO:0001913	12	BP
GO:0010629	12	BP
GO:0006884	12	BP
GO:0035082	12	BP
GO:0034626	12	BP
GO:0001771	12	BP
GO:0070840	12	MF
GO:0016279	12	MF
GO:0006417	12	BP
GO:0042552	12	BP
GO:0051879	12	MF
GO:0006913	12	BP
GO:0008509	12	MF
GO:0016298	12	MF
GO:0005875	12	CC
GO:0043240	12	CC
GO:0008307	12	MF
GO:0015871	12	BP
GO:0009922	12	MF
GO:0032511	12	BP
GO:0032958	12	BP
GO:0001653	12	MF
GO:0002039	12	MF
GO:0071144	12	CC
GO:0035615	12	MF
GO:0034976	12	BP
GO:0002376	12	BP
GO:2000649	12	BP
GO:0001682	12	BP
GO:0008138	12	MF
GO:0002052	12	BP
GO:0006744	12	BP
GO:0048167	12	BP
GO:0042795	12	BP
GO:0034198	12	BP
GO:0036158	12	BP
GO:0043122	12	BP
GO:0015804	12	BP
GO:0007062	12	BP
GO:0005871	12	CC
GO:0008320	12	MF
GO:0005740	12	CC
GO:0005952	12	CC
GO:0000727	12	BP
GO:0030705	12	BP
GO:0004806	12	MF
GO:0004715	12	MF
GO:0046930	12	CC
GO:0046928	12	BP
GO:0043491	12	BP
GO:0017080	12	MF
GO:0004089	12	MF
GO:0030992	12	CC
GO:0071933	12	MF
GO:0031526	12	CC
GO:0051400	12	MF
GO:0031624	12	MF
GO:0000132	12	BP
GO:0097120	12	BP
GO:0004000	12	MF
GO:0060395	12	BP
GO:0031638	12	BP
GO:0030686	12	CC
GO:0000082	12	BP
GO:0051715	12	BP
GO:0003995	12	MF
GO:0030048	12	BP
GO:0030125	12	CC
GO:0046330	12	BP
GO:0016607	12	CC
GO:0017116	12	MF
GO:0000165	12	BP
GO:0072534	12	CC
GO:0019367	12	BP
GO:0051371	12	MF
GO:0045095	12	CC
GO:0019229	12	BP
GO:0017134	12	MF
GO:0000027	12	BP
GO:0046931	12	BP
GO:0004703	12	MF
GO:0017154	12	MF
GO:0031072	12	MF
GO:0033549	11	MF
GO:0004602	11	MF
GO:0055064	11	BP
GO:0016779	11	MF
GO:0006518	11	BP
GO:0023051	11	BP
GO:0002020	11	MF
GO:0050291	11	MF
GO:0002040	11	BP
GO:0051014	11	BP
GO:0044237	11	unknown
GO:0009435	11	BP
GO:0016811	11	MF
GO:0031629	11	BP
GO:0098970	11	BP
GO:0009451	11	BP
GO:0048255	11	BP
GO:0042910	11	MF
GO:0043015	11	MF
GO:0015245	11	MF
GO:0043652	11	BP
GO:0071108	11	BP
GO:0055075	11	BP
GO:0004857	11	MF
GO:0040029	11	BP
GO:0031124	11	BP
GO:0006044	11	BP
GO:0007602	11	BP
GO:0004864	11	MF
GO:0015377	11	MF
GO:0048788	11	CC
GO:0015379	11	MF
GO:0001973	11	BP
GO:0035329	11	BP
GO:0008171	11	MF
GO:0005685	11	CC
GO:0008381	11	MF
GO:0008292	11	BP
GO:0047372	11	MF
GO:0033179	11	CC
GO:0004519	11	MF
GO:0005801	11	CC
GO:0061617	11	CC
GO:0006183	11	BP
GO:0001510	11	BP
GO:0005905	11	CC
GO:0006308	11	BP
GO:0008519	11	MF
GO:0033554	11	BP
GO:0071277	11	BP
GO:0000245	11	BP
GO:0004890	11	MF
GO:1904262	11	BP
GO:0005852	11	CC
GO:0008467	11	MF
GO:0044666	11	CC
GO:0061665	11	MF
GO:0002098	11	BP
GO:0005751	11	unknown
GO:0009982	11	MF
GO:0019900	11	MF
GO:0051764	11	BP
GO:0042246	11	BP
GO:0019904	11	MF
GO:0008202	11	BP
GO:0004559	11	MF
GO:0005689	11	CC
GO:0051787	11	MF
GO:0001609	11	MF
GO:0009072	11	BP
GO:0005248	11	MF
GO:0005307	11	MF
GO:0030427	11	CC
GO:0048018	11	MF
GO:0016308	11	MF
GO:0006665	11	BP
GO:0030127	11	CC
GO:0031965	11	CC
GO:0007095	11	BP
GO:0001816	11	BP
GO:0032039	11	CC
GO:0016018	11	MF
GO:0016051	11	BP
GO:0051560	11	BP
GO:0050776	11	BP
GO:0070530	11	MF
GO:0043236	11	MF
GO:0036444	11	BP
GO:0048024	11	BP
GO:0046835	11	BP
GO:0030165	11	MF
GO:0030155	11	BP
GO:0016043	11	BP
GO:0030426	11	CC
GO:0043488	11	BP
GO:0001934	11	BP
GO:1990817	11	MF
GO:0005388	11	MF
GO:0051231	11	BP
GO:0043296	11	CC
GO:0005044	11	MF
GO:0016358	11	BP
GO:0045503	10	MF
GO:0043252	10	BP
GO:0098574	10	CC
GO:0006402	10	BP
GO:0034599	10	BP
GO:0003688	10	MF
GO:0042310	10	BP
GO:0035249	10	BP
GO:0008474	10	MF
GO:0030206	10	unknown
GO:0016907	10	MF
GO:0061061	10	BP
GO:0005753	10	unknown
GO:0005858	10	CC
GO:0048029	10	MF
GO:0019887	10	MF
GO:0004303	10	MF
GO:0150105	10	BP
GO:0031110	10	BP
GO:0008217	10	BP
GO:0044539	10	BP
GO:0000463	10	BP
GO:0097352	10	BP
GO:0006883	10	BP
GO:0033691	10	MF
GO:0002224	10	BP
GO:0019706	10	MF
GO:0006309	10	BP
GO:0042562	10	MF
GO:0010507	10	BP
GO:0004190	10	MF
GO:0016079	10	BP
GO:0008376	10	MF
GO:0030983	10	MF
GO:0050728	10	BP
GO:0000828	10	MF
GO:0001054	10	unknown
GO:0070212	10	BP
GO:0007040	10	BP
GO:0098794	10	CC
GO:1990246	10	CC
GO:0000176	10	CC
GO:0019903	10	MF
GO:0006383	10	BP
GO:0017148	10	BP
GO:0045666	10	BP
GO:0090110	10	BP
GO:0043039	10	BP
GO:0046933	10	MF
GO:0070679	10	MF
GO:1990907	10	CC
GO:0006885	10	BP
GO:0034364	10	CC
GO:0008641	10	MF
GO:0070628	10	MF
GO:0016575	10	unknown
GO:0008053	10	BP
GO:0038084	10	BP
GO:0018279	10	BP
GO:0051059	10	MF
GO:0005547	10	MF
GO:0032465	10	BP
GO:0070782	10	BP
GO:0034361	10	CC
GO:0050830	10	BP
GO:0030032	10	BP
GO:1902936	10	MF
GO:0043548	10	MF
GO:0030016	10	CC
GO:0061512	10	BP
GO:0034315	10	BP
GO:0004935	10	MF
GO:0050808	10	BP
GO:0004861	10	MF
GO:0015347	10	MF
GO:0031167	10	BP
GO:0006002	10	BP
GO:0001784	10	MF
GO:0007517	10	BP
GO:0030552	10	MF
GO:0030515	10	MF
GO:0051321	10	BP
GO:1902742	10	BP
GO:0006614	10	BP
GO:0006633	10	BP
GO:0030117	10	CC
GO:0005637	10	CC
GO:0000083	10	unknown
GO:0032446	10	BP
GO:0016525	10	BP
GO:0036376	10	BP
GO:0046512	10	BP
GO:0032869	10	BP
GO:0086010	10	BP
GO:0051131	10	BP
GO:0045182	10	MF
GO:0070085	10	BP
GO:0046974	10	MF
GO:0048787	10	CC
GO:0005003	10	MF
GO:0048786	10	CC
GO:0019915	10	BP
GO:0009086	10	BP
GO:0007193	10	BP
GO:0006513	10	BP
GO:0032051	10	MF
GO:0030007	10	BP
GO:0042060	10	BP
GO:0005247	10	MF
GO:0031941	10	CC
GO:0072488	9	BP
GO:0036122	9	MF
GO:0006937	9	BP
GO:0006259	9	BP
GO:0006241	9	BP
GO:0009062	9	BP
GO:0050482	9	BP
GO:0030368	9	MF
GO:0042555	9	CC
GO:0004571	9	MF
GO:0034472	9	BP
GO:0006171	9	BP
GO:0019205	9	MF
GO:0030239	9	BP
GO:0051601	9	BP
GO:0019208	9	MF
GO:0045216	9	BP
GO:0071004	9	CC
GO:0045292	9	BP
GO:0000028	9	BP
GO:0034362	9	CC
GO:0035999	9	BP
GO:0007031	9	BP
GO:0140664	9	MF
GO:0030234	9	MF
GO:0080025	9	MF
GO:0061024	9	BP
GO:0007099	9	BP
GO:0002062	9	BP
GO:0070831	9	BP
GO:0006695	9	BP
GO:0004438	9	MF
GO:0007173	9	BP
GO:0045907	9	BP
GO:0007194	9	BP
GO:0007197	9	BP
GO:0030131	9	CC
GO:0007214	9	BP
GO:0035435	9	BP
GO:0046034	9	BP
GO:0060468	9	BP
GO:0050821	9	BP
GO:0001992	9	BP
GO:0006559	9	BP
GO:0006567	9	BP
GO:0040037	9	BP
GO:0030126	9	CC
GO:0001578	9	BP
GO:0050806	9	BP
GO:0007274	9	BP
GO:0000070	9	BP
GO:0001968	9	MF
GO:0030100	9	BP
GO:0006465	9	BP
GO:0002084	9	BP
GO:0045814	9	BP
GO:0000177	9	CC
GO:0030490	9	BP
GO:0001917	9	CC
GO:0031045	9	CC
GO:0004550	9	MF
GO:0034975	9	BP
GO:0034993	9	CC
GO:0031011	9	CC
GO:0008408	9	MF
GO:0070536	9	BP
GO:0006783	9	BP
GO:0045595	9	BP
GO:0030168	9	BP
GO:0008331	9	MF
GO:0045786	9	BP
GO:0019773	9	CC
GO:0000172	9	CC
GO:0035805	9	CC
GO:0007094	9	BP
GO:0035804	9	MF
GO:0002116	9	CC
GO:0008273	9	MF
GO:0061077	9	unknown
GO:0008251	9	MF
GO:0042274	9	BP
GO:1904382	9	BP
GO:0051496	9	BP
GO:0070531	9	CC
GO:0050684	9	BP
GO:0015095	9	MF
GO:0005847	9	CC
GO:0015276	9	MF
GO:0015279	9	MF
GO:0061608	9	MF
GO:0004862	9	MF
GO:0033314	9	BP
GO:0098802	9	CC
GO:0004865	9	MF
GO:0015386	9	MF
GO:0015421	9	MF
GO:0048172	9	BP
GO:0043001	9	BP
GO:0015269	9	MF
GO:0043567	9	BP
GO:0051123	9	BP
GO:0016604	9	CC
GO:0071577	9	BP
GO:0015721	9	BP
GO:0004720	9	MF
GO:0010181	9	MF
GO:0005885	9	CC
GO:0000380	9	BP
GO:0048598	9	BP
GO:0016641	9	MF
GO:0055074	9	BP
GO:0016514	9	CC
GO:0044224	9	CC
GO:0003785	9	MF
GO:0000266	9	BP
GO:0097730	9	CC
GO:0015035	9	MF
GO:0032880	9	BP
GO:0016818	9	MF
GO:0071456	9	BP
GO:0015074	9	BP
GO:0016812	9	MF
GO:0098560	9	CC
GO:0005665	9	CC
GO:0005545	9	MF
GO:0051276	9	BP
GO:0071385	9	BP
GO:0033173	9	BP
GO:0044183	9	MF
GO:0071944	9	CC
GO:0033209	9	BP
GO:0015204	9	MF
GO:0005795	9	CC
GO:0016772	9	MF
GO:0043153	9	BP
GO:0098887	9	BP
GO:0016830	9	MF
GO:0004983	9	MF
GO:0006000	9	BP
GO:0048019	9	MF
GO:0043256	9	CC
GO:0005000	9	MF
GO:0016486	9	BP
GO:0004994	9	MF
GO:0034080	9	BP
GO:0016236	9	BP
GO:0018216	9	BP
GO:0000930	9	CC
GO:0016274	9	MF
GO:0031995	9	MF
GO:0099072	9	BP
GO:0005078	9	MF
GO:0031994	9	MF
GO:0050930	9	BP
GO:0018057	9	BP
GO:0016126	9	BP
GO:0009395	9	BP
GO:0008094	8	MF
GO:0030214	8	BP
GO:0004382	8	MF
GO:0016176	8	MF
GO:0042043	8	MF
GO:0043138	8	MF
GO:0001932	8	BP
GO:1905475	8	BP
GO:0047442	8	unknown
GO:0015186	8	MF
GO:0030014	8	CC
GO:0002009	8	BP
GO:0070822	8	CC
GO:0016082	8	BP
GO:0007129	8	BP
GO:0007026	8	BP
GO:0015171	8	MF
GO:0030388	8	BP
GO:0000423	8	BP
GO:0015020	8	MF
GO:0030332	8	MF
GO:0042171	8	MF
GO:0003810	8	MF
GO:0006895	8	BP
GO:0019919	8	BP
GO:0030295	8	MF
GO:0005686	8	CC
GO:0004439	8	MF
GO:0006020	8	BP
GO:0061817	8	BP
GO:0016247	8	MF
GO:0043124	8	BP
GO:0016798	8	MF
GO:0086091	8	BP
GO:0004415	8	MF
GO:0032154	8	CC
GO:0043325	8	MF
GO:0006509	8	BP
GO:0030042	8	BP
GO:0006836	8	BP
GO:0015280	8	MF
GO:0007631	8	BP
GO:0004175	8	MF
GO:0048038	8	MF
GO:0060307	8	BP
GO:0016010	8	CC
GO:2000045	8	BP
GO:0043209	8	CC
GO:0043551	8	unknown
GO:0005337	8	MF
GO:0051968	8	BP
GO:0043248	8	BP
GO:0030159	8	MF
GO:0001938	8	BP
GO:0016529	8	CC
GO:0004957	8	MF
GO:0004366	8	MF
GO:0030132	8	CC
GO:0030133	8	CC
GO:0030512	8	BP
GO:0031929	8	BP
GO:0006694	8	BP
GO:0015934	8	CC
GO:0005272	8	MF
GO:0032432	8	CC
GO:0007163	8	BP
GO:0001707	8	BP
GO:0006729	8	BP
GO:0006654	8	BP
GO:0015693	8	BP
GO:0005223	8	MF
GO:0005222	8	MF
GO:0004860	8	MF
GO:0031932	8	CC
GO:0043162	8	BP
GO:0004176	8	MF
GO:0006790	8	BP
GO:0140658	8	MF
GO:0051256	8	BP
GO:0043596	8	CC
GO:0006611	8	BP
GO:0015385	8	MF
GO:0030097	8	BP
GO:0016075	8	BP
GO:0016064	8	BP
GO:0035627	8	BP
GO:0007338	8	BP
GO:0032483	8	BP
GO:0070652	8	CC
GO:0007288	8	BP
GO:0000340	8	MF
GO:0032264	8	BP
GO:0005432	8	MF
GO:0005221	8	MF
GO:0016831	8	MF
GO:0001649	8	BP
GO:0045116	8	BP
GO:0008327	8	MF
GO:0008889	8	MF
GO:0072542	8	MF
GO:0002250	8	BP
GO:0003254	8	BP
GO:0098793	8	CC
GO:0035036	8	BP
GO:0006268	8	unknown
GO:0001056	8	unknown
GO:0006360	8	BP
GO:0018149	8	BP
GO:0004726	8	MF
GO:0006090	8	BP
GO:0017110	8	MF
GO:0017025	8	MF
GO:0099590	8	BP
GO:0008484	8	MF
GO:0019433	8	BP
GO:0099560	8	BP
GO:0042446	8	BP
GO:0042627	8	CC
GO:0004527	8	MF
GO:0099558	8	BP
GO:0034097	8	BP
GO:0017101	8	CC
GO:0072546	8	CC
GO:0045263	8	unknown
GO:0004536	8	MF
GO:0033539	8	BP
GO:0051379	8	MF
GO:0003007	8	BP
GO:0042448	8	BP
GO:0098943	8	BP
GO:0019226	8	BP
GO:0017071	8	CC
GO:0009410	8	BP
GO:0070979	8	BP
GO:0019228	8	BP
GO:0004530	8	MF
GO:2000300	8	BP
GO:1990542	8	BP
GO:0034427	8	unknown
GO:0033180	8	CC
GO:0034969	8	unknown
GO:0016926	8	BP
GO:0016868	8	MF
GO:0071038	8	BP
GO:0006401	8	BP
GO:0006405	8	BP
GO:0045742	8	BP
GO:0000796	8	CC
GO:0006072	8	BP
GO:0042594	8	BP
GO:1901642	8	BP
GO:0031573	8	BP
GO:0031588	8	CC
GO:0033017	8	CC
GO:0071035	8	BP
GO:0008510	8	MF
GO:0009060	8	BP
GO:0032991	8	CC
GO:0008250	8	CC
GO:0017136	8	MF
GO:0045732	8	BP
GO:0045134	8	MF
GO:0004712	8	MF
GO:0042593	8	BP
GO:0004033	8	unknown
GO:0048666	8	BP
GO:0090309	8	unknown
GO:0016973	8	BP
GO:0005879	8	CC
GO:0044545	8	CC
GO:0019902	8	MF
GO:0008299	8	BP
GO:0017119	8	CC
GO:0004508	8	MF
GO:0009116	8	BP
GO:0016012	7	CC
GO:0034464	7	CC
GO:0031116	7	BP
GO:0051694	7	BP
GO:1990961	7	BP
GO:0008543	7	BP
GO:0008569	7	MF
GO:0106274	7	MF
GO:0090557	7	BP
GO:0032426	7	CC
GO:0016504	7	MF
GO:0034475	7	BP
GO:0051010	7	MF
GO:0031083	7	CC
GO:0051493	7	BP
GO:0015015	7	unknown
GO:0018120	7	unknown
GO:0000956	7	BP
GO:0008643	7	BP
GO:0016233	7	BP
GO:0006996	7	BP
GO:0097225	7	CC
GO:0006959	7	BP
GO:0051721	7	MF
GO:0006940	7	BP
GO:0071786	7	BP
GO:0016272	7	CC
GO:0006939	7	BP
GO:0032008	7	BP
GO:0030258	7	BP
GO:0009247	7	BP
GO:0000974	7	CC
GO:0016286	7	MF
GO:0030336	7	BP
GO:0071787	7	BP
GO:0016303	7	MF
GO:0031274	7	BP
GO:0016209	7	MF
GO:0018401	7	BP
GO:0001727	7	MF
GO:0032259	7	BP
GO:0031419	7	MF
GO:0090502	7	unknown
GO:0030177	7	BP
GO:0007064	7	BP
GO:0019239	7	MF
GO:0032233	7	BP
GO:0016125	7	BP
GO:0000460	7	BP
GO:0031369	7	MF
GO:0032438	7	BP
GO:0097272	7	BP
GO:0097250	7	BP
GO:0007035	7	BP
GO:0009306	7	BP
GO:0072393	7	BP
GO:0008541	7	CC
GO:0034650	7	BP
GO:0035735	7	BP
GO:0035332	7	BP
GO:0008312	7	MF
GO:0070830	7	BP
GO:0051639	7	BP
GO:0015183	7	MF
GO:0030003	7	BP
GO:0033198	7	BP
GO:0030008	7	CC
GO:0090141	7	BP
GO:0008330	7	MF
GO:0097546	7	CC
GO:0032591	7	CC
GO:0098719	7	BP
GO:0008343	7	BP
GO:0071376	7	BP
GO:0000290	7	BP
GO:0030976	7	MF
GO:0000307	7	CC
GO:0010811	7	BP
GO:0033138	7	BP
GO:0008048	7	MF
GO:0071398	7	BP
GO:0008239	7	MF
GO:0016829	7	MF
GO:0140297	7	MF
GO:0032933	7	BP
GO:0008199	7	MF
GO:2000134	7	BP
GO:0019934	7	BP
GO:0032924	7	BP
GO:0000781	7	CC
GO:0019955	7	MF
GO:0010975	7	BP
GO:0000774	7	MF
GO:0001516	7	BP
GO:0051382	7	BP
GO:0051642	7	BP
GO:0001517	7	MF
GO:0008143	7	MF
GO:0001055	7	unknown
GO:0008047	7	MF
GO:0010033	7	unknown
GO:0000815	7	CC
GO:0015491	7	unknown
GO:0120013	7	MF
GO:0017108	7	MF
GO:0050790	7	BP
GO:0035259	7	MF
GO:0007249	7	BP
GO:0017111	7	MF
GO:0098855	7	CC
GO:2001234	7	BP
GO:0035721	7	BP
GO:0032452	7	MF
GO:0016559	7	BP
GO:0007212	7	BP
GO:0016558	7	BP
GO:0008499	7	MF
GO:0034587	7	BP
GO:0033700	7	BP
GO:0033550	7	MF
GO:0032486	7	BP
GO:0008045	7	BP
GO:0007389	7	BP
GO:0000079	7	BP
GO:0071375	7	BP
GO:0008378	7	MF
GO:0010628	7	BP
GO:0008395	7	MF
GO:0017069	7	MF
GO:0001570	7	BP
GO:0008420	7	MF
GO:0016628	7	MF
GO:0007548	7	BP
GO:0010508	7	BP
GO:0007528	7	BP
GO:0000178	7	CC
GO:0016624	7	MF
GO:0050804	7	BP
GO:0008432	7	MF
GO:0001614	7	MF
GO:0032050	7	MF
GO:0046855	7	unknown
GO:0005655	7	CC
GO:0036159	7	BP
GO:0005548	7	MF
GO:0055072	7	unknown
GO:0005539	7	MF
GO:0070059	7	BP
GO:0038203	7	BP
GO:0005250	7	MF
GO:0043277	7	BP
GO:0006622	7	BP
GO:0005172	7	MF
GO:0001965	7	MF
GO:0005158	7	MF
GO:0005154	7	MF
GO:0043328	7	BP
GO:0005113	7	MF
GO:0055090	7	BP
GO:0006646	7	BP
GO:0004938	7	MF
GO:0004931	7	MF
GO:0003993	7	MF
GO:0038036	7	MF
GO:0045022	7	BP
GO:0006689	7	BP
GO:1990124	7	unknown
GO:0047238	7	MF
GO:0004706	7	MF
GO:0006700	7	BP
GO:0006704	7	BP
GO:1903561	7	CC
GO:0060097	7	BP
GO:0005579	7	CC
GO:0005675	7	CC
GO:0070095	7	MF
GO:0006102	7	BP
GO:0042392	7	MF
GO:0006378	7	unknown
GO:0042403	7	BP
GO:0042407	7	BP
GO:1901386	7	BP
GO:0042470	7	CC
GO:0070286	7	BP
GO:0006398	7	BP
GO:0006228	7	BP
GO:0042572	7	BP
GO:0042622	7	CC
GO:1990589	7	CC
GO:0006108	7	BP
GO:0070187	7	CC
GO:0003726	7	MF
GO:0006085	7	BP
GO:0006013	7	BP
GO:0006450	7	BP
GO:0006488	7	BP
GO:0005865	7	CC
GO:0043020	7	CC
GO:0048484	7	BP
GO:0006515	7	BP
GO:0005786	7	CC
GO:0048312	7	BP
GO:0042056	7	MF
GO:0006541	7	BP
GO:0048311	7	BP
GO:0045261	7	unknown
GO:0006382	7	BP
GO:0006868	7	BP
GO:0045736	7	BP
GO:0036092	7	BP
GO:0046427	7	BP
GO:0045746	7	BP
GO:0004144	7	MF
GO:0036126	7	CC
GO:0060548	7	unknown
GO:0045930	7	BP
GO:0036089	7	BP
GO:0004331	7	MF
GO:0045745	7	BP
GO:0045860	7	BP
GO:0004531	7	MF
GO:0060294	7	BP
GO:0060170	7	CC
GO:0060228	7	MF
GO:0004298	7	MF
GO:0004540	7	MF
GO:0060754	7	BP
GO:0004520	7	MF
GO:1902093	6	BP
GO:0071356	6	BP
GO:0033365	6	BP
GO:0003100	6	BP
GO:0004340	6	MF
GO:0071339	6	CC
GO:0004586	6	MF
GO:0033387	6	BP
GO:0030130	6	CC
GO:0005844	6	unknown
GO:0000064	6	MF
GO:0005869	6	CC
GO:0071230	6	BP
GO:0042989	6	unknown
GO:0005903	6	CC
GO:0002768	6	BP
GO:0009972	6	unknown
GO:0009968	6	BP
GO:0033588	6	CC
GO:0003691	6	MF
GO:0033177	6	CC
GO:0071392	6	BP
GO:0051028	6	BP
GO:0015165	6	MF
GO:0005664	6	CC
GO:0097623	6	BP
GO:0032797	6	CC
GO:0003834	6	MF
GO:0015075	6	MF
GO:0005682	6	CC
GO:0048280	6	BP
GO:0005684	6	CC
GO:0003828	6	MF
GO:0004396	6	MF
GO:0003796	6	MF
GO:0005746	6	unknown
GO:0014826	6	BP
GO:0014704	6	CC
GO:0000794	6	CC
GO:0030116	6	MF
GO:0033014	6	BP
GO:0060585	6	unknown
GO:0010976	6	BP
GO:2000406	6	BP
GO:0003689	6	MF
GO:0048384	6	BP
GO:0010906	6	BP
GO:0000900	6	MF
GO:0009725	6	BP
GO:0071218	6	BP
GO:0034657	6	CC
GO:0034504	6	BP
GO:0008526	6	MF
GO:0034551	6	BP
GO:0042574	6	BP
GO:0030497	6	BP
GO:0008506	6	MF
GO:0004177	6	MF
GO:0046580	6	BP
GO:0042500	6	MF
GO:0006265	6	BP
GO:0046627	6	BP
GO:0034632	6	MF
GO:0006271	6	BP
GO:0005944	6	CC
GO:0034703	6	CC
GO:0120009	6	BP
GO:1905605	6	BP
GO:0035005	6	MF
GO:0006312	6	BP
GO:0006346	6	BP
GO:0048814	6	BP
GO:0046847	6	BP
GO:0051864	6	MF
GO:0035097	6	CC
GO:0030317	6	BP
GO:0030318	6	BP
GO:0008603	6	MF
GO:0086002	6	BP
GO:0034452	6	MF
GO:0006122	6	BP
GO:0005945	6	CC
GO:0033962	6	BP
GO:0034045	6	CC
GO:0005657	6	CC
GO:0005956	6	CC
GO:0098982	6	CC
GO:0099078	6	CC
GO:0009263	6	BP
GO:0009253	6	BP
GO:0000056	6	BP
GO:0006003	6	BP
GO:0034236	6	MF
GO:0009134	6	BP
GO:0000055	6	BP
GO:0042799	6	MF
GO:0042797	6	BP
GO:0042796	6	BP
GO:0071014	6	CC
GO:0099536	6	BP
GO:0008865	6	MF
GO:0030172	6	MF
GO:0034388	6	CC
GO:0034394	6	BP
GO:0030183	6	BP
GO:0034450	6	MF
GO:0015180	6	MF
GO:0015254	6	MF
GO:0015189	6	MF
GO:0016765	6	MF
GO:0004744	6	unknown
GO:0004748	6	MF
GO:0061621	6	BP
GO:0004758	6	MF
GO:0044772	6	BP
GO:0016922	6	MF
[truncated: 4,903 more rows]
